# Supplementary material for: Metal-free carbonitration of alkenes using K2S2O8
Source: Royal Society of Chemistry journal article supplement (doi:10.1039/c3cc47287f), 2013-01-01

## Supporting Information

### Metal-Free Carbonitration of Alkenes Using $K_2S_2O_8$

Ya-Min Li,<sup>a</sup> Xiao-Hong Wei,<sup>a</sup> Xi-An Li,<sup>a</sup> and Shang-Dong Yang<sup>\*a,b</sup>

<sup>a</sup> State Key Laboratory of Applied Organic Chemistry, Lanzhou University, Lanzhou 730000, P. R. China. E-mail: yangshd@lzu.edu.cn; Fax: +86-931-8912859; Tel: +86-931-8912859

<sup>b</sup> State Key Laboratory for Oxo Synthesis and Selective Oxidation Lanzhou Institute of Chemical Physics  
Lanzhou 730000, P. R. China

|                                                                            |         |
|----------------------------------------------------------------------------|---------|
| 1. General information                                                     | S2      |
| 2. Typical Procedures for the Synthesis of Substrates                      | S2      |
| 3. General procedure for arylnitration of alkenes                          | S2-S3   |
| 4. Competing kinetic isotope effect (KIE) and radical trapping experiments | S3-S5   |
| 5. Synthesis of 1,3-dimethylindolin-2-one (3a)                             | S5      |
| 6. Synthesis of 3-hydroxy-1,3-dimethylindolin-2-one (3b)                   | S5      |
| 7. Synthesis of 3-(aminomethyl)-1,3-dimethylindolin-2-one (3c)             | S6      |
| 8. Characterization of new compounds                                       | S6-S13  |
| 9. Charts of new compounds                                                 | S14-S48 |

## 1. General information

$^1\text{H}$  and  $^{13}\text{C}$  NMR spectra were recorded on a Bruker advance III 400 spectrometer in  $\text{CDCl}_3$  with TMS as internal standard.  $^{19}\text{F}$  NMR were recorded on the same instrument. IR spectra were recorded on a Nexus 670 FT-IR spectrometer and only major peaks are reported in  $\text{cm}^{-1}$ . HRMS data were determined on a Bruker Daltonics APEXII 47e FT-ICR spectrometer. MS data were determined on a Bruker ESI-MS. The starting materials were purchased from Aldrich, Acros Organics, J&K Chemicals or TCI and used without further purification. Solvents were dried and purified according to the procedure from "Purification of Laboratory Chemicals book". Column chromatography was carried out on silica gel (particle size 200-400 mesh ASTM).

## 2. Typical Procedures for the Synthesis of Substrates

The preparation of amide **1** were described in previous reports, and the NMR spectroscopy were consisted with the those data.<sup>[S1]</sup>

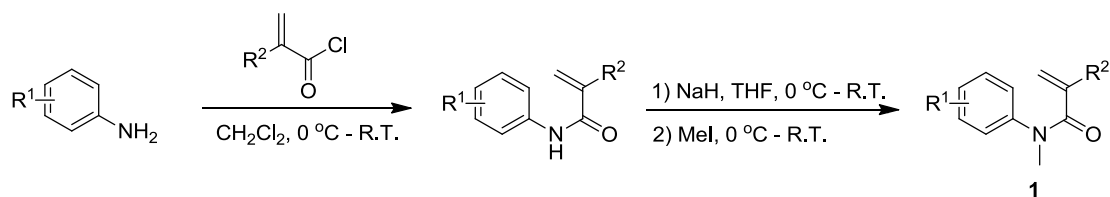

The synthesis of substrate **1r-1x**

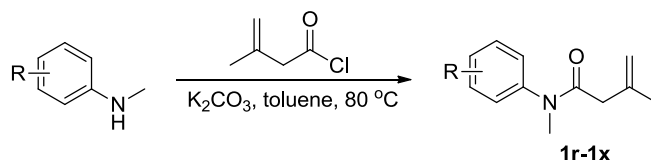

To a stirred solution of *N*-methylaniline (10 mmol) in toluene (20 mL) were added anhydrous  $\text{K}_2\text{CO}_3$  (15 mmol) and acyl chloride (15 mmol). The mixture was heated to 80 °C for 12 h. After completion, the reaction was quenched with  $\text{H}_2\text{O}$  and extracted with EtOAc. The extract was washed with brine and dried over  $\text{MgSO}_4$ . Concentration under reduced pressure and purification by silica gel flash chromatography to afford the amide **1r-1x**.

## 3. General procedure for arylnitration of alkenes

In a sealed tube, amide **1** (0.40 mmol),  $\text{NaNO}_2$  (55 mg, 0.80 mmol),  $\text{K}_2\text{S}_2\text{O}_8$  (216 mg, 0.80 mmol) and anhydrous  $\text{CH}_3\text{CN}$  (2 mL) were added. The mixture was allowed to stir at 120 °C for 16 hours. The reaction was cooled to room temperature and diluted with EtOAc, then filtering through a bed of Celite. The filtered reaction mixture was concentrated by rotary evaporation and purified by column chromatography to give the product **2**.

Table S1. Reaction Conditions Screening.<sup>a</sup>

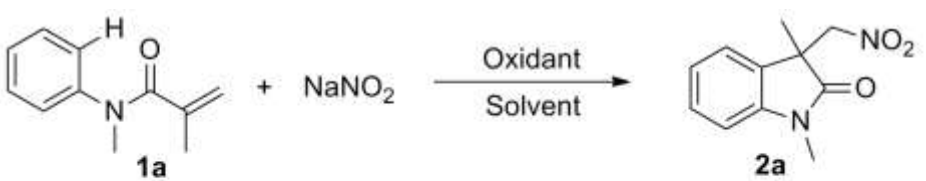

| Entry           | Oxidant (equiv)                                                     | MNO <sub>2</sub> (equiv)                                | Solvent                         | Yield (%) <sup>b</sup> |
|-----------------|---------------------------------------------------------------------|---------------------------------------------------------|---------------------------------|------------------------|
| 1               | Na <sub>2</sub> S <sub>2</sub> O <sub>8</sub> (2.0)                 | NaNO <sub>2</sub> (2.0)                                 | CH <sub>3</sub> CN              | Trace                  |
| 2               | (NH <sub>4</sub> ) <sub>2</sub> S <sub>2</sub> O <sub>8</sub> (2.0) | NaNO <sub>2</sub> (2.0)                                 | CH <sub>3</sub> CN              | 16                     |
| 3               | K <sub>2</sub> S <sub>2</sub> O <sub>8</sub> (2.0)                  | NaNO <sub>2</sub> (2.0)                                 | CH <sub>3</sub> CN              | 71                     |
| 4               | Oxone (2.0)                                                         | NaNO <sub>2</sub> (2.0)                                 | CH <sub>3</sub> CN              | 14                     |
| 5               | K <sub>2</sub> S <sub>2</sub> O <sub>8</sub> (2.0)                  | KNO <sub>2</sub> (2.0)                                  | CH <sub>3</sub> CN              | 70                     |
| 6               | K <sub>2</sub> S <sub>2</sub> O <sub>8</sub> (2.0)                  | AgNO <sub>2</sub> (2.0)                                 | CH <sub>3</sub> CN              | 66                     |
| 7               | K <sub>2</sub> S <sub>2</sub> O <sub>8</sub> (2.0)                  | Na <sub>3</sub> Co(NO <sub>2</sub> ) <sub>6</sub> (2.0) | CH <sub>3</sub> CN              | 0                      |
| 8 <sup>c</sup>  | K <sub>2</sub> S <sub>2</sub> O <sub>8</sub> (2.0)                  | NaNO <sub>2</sub> (2.0)                                 | CH <sub>3</sub> CN              | 86(75) <sup>d</sup>    |
| 9 <sup>c</sup>  | K <sub>2</sub> S <sub>2</sub> O <sub>8</sub> (2.0)                  | NaNO <sub>2</sub> (2.0)                                 | toluene                         | 41                     |
| 10 <sup>c</sup> | K <sub>2</sub> S <sub>2</sub> O <sub>8</sub> (2.0)                  | NaNO <sub>2</sub> (2.0)                                 | DMF                             | 24                     |
| 11 <sup>c</sup> | K <sub>2</sub> S <sub>2</sub> O <sub>8</sub> (2.0)                  | NaNO <sub>2</sub> (2.0)                                 | DMSO                            | 40                     |
| 12 <sup>c</sup> | K <sub>2</sub> S <sub>2</sub> O <sub>8</sub> (2.0)                  | NaNO <sub>2</sub> (2.0)                                 | 1,4-dioxane                     | 50                     |
| 13 <sup>c</sup> | K <sub>2</sub> S <sub>2</sub> O <sub>8</sub> (2.0)                  | NaNO <sub>2</sub> (2.0)                                 | CH <sub>3</sub> NO <sub>2</sub> | 62                     |
| 14 <sup>c</sup> | K <sub>2</sub> S <sub>2</sub> O <sub>8</sub> (2.0)                  | NaNO <sub>2</sub> (2.0)                                 | PhCl                            | 65                     |
| 15 <sup>c</sup> | K <sub>2</sub> S <sub>2</sub> O <sub>8</sub> (2.0)                  | NaNO <sub>2</sub> (2.0)                                 | DCE                             | 42                     |
| 16 <sup>c</sup> | K <sub>2</sub> S <sub>2</sub> O <sub>8</sub> (1.5)                  | NaNO <sub>2</sub> (2.0)                                 | CH <sub>3</sub> CN              | 78                     |
| 17 <sup>c</sup> | K <sub>2</sub> S <sub>2</sub> O <sub>8</sub> (1.0)                  | NaNO <sub>2</sub> (2.0)                                 | CH <sub>3</sub> CN              | 72                     |
| 18 <sup>c</sup> | K <sub>2</sub> S <sub>2</sub> O <sub>8</sub> (2.0)                  | NaNO <sub>2</sub> (3.0)                                 | CH <sub>3</sub> CN              | 65                     |
| 19 <sup>c</sup> | -                                                                   | NaNO <sub>2</sub> (2.0)                                 | CH <sub>3</sub> CN              | N.R.                   |

<sup>a</sup> Reaction conditions: **1a** (0.4 mmol) in dry CH<sub>3</sub>CN (4 mL) with stirring at 120 °C for 16 h.

<sup>b</sup> GC estimation using biphenyl as internal reference, N.R. = no reaction.

<sup>c</sup> 2 mL CH<sub>3</sub>CN was used.

<sup>d</sup> Isolated yield.

#### 4. Competing kinetic isotope effect (KIE) and radical trapping experiments

##### a) Intramolecular KIE experiment

[D<sub>1</sub>]-**1a** were synthesized deuterium substrates according the literature procedure.<sup>[S2]</sup> In a sealed tube, [D<sub>1</sub>]-**1a** (70 mg, 0.40 mmol), NaNO<sub>2</sub> (55 mg, 0.80 mmol), K<sub>2</sub>S<sub>2</sub>O<sub>8</sub> (216 mg, 0.80 mmol), and anhydrous CH<sub>3</sub>CN (2 mL) were added. The mixture was allowed to stir at 120 °C for 16 hours. The reaction was cooled to room temperature and diluted with EtOAc, then filtering through a bed of Celite. The filtered reaction mixture was concentrated by rotary evaporation and purified by column chromatography to give the product **2a** and [D<sub>1</sub>]-**2a**. The products were under <sup>1</sup>H-NMR analysis (Figure S1).

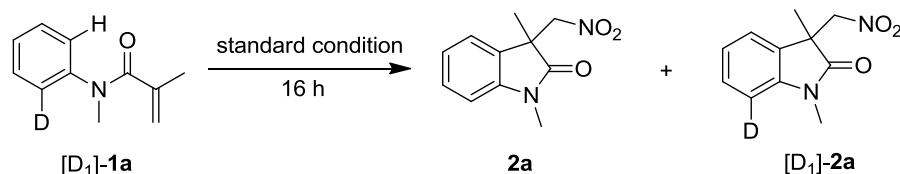

58% yield,  $K_H/K_D = 0.9$

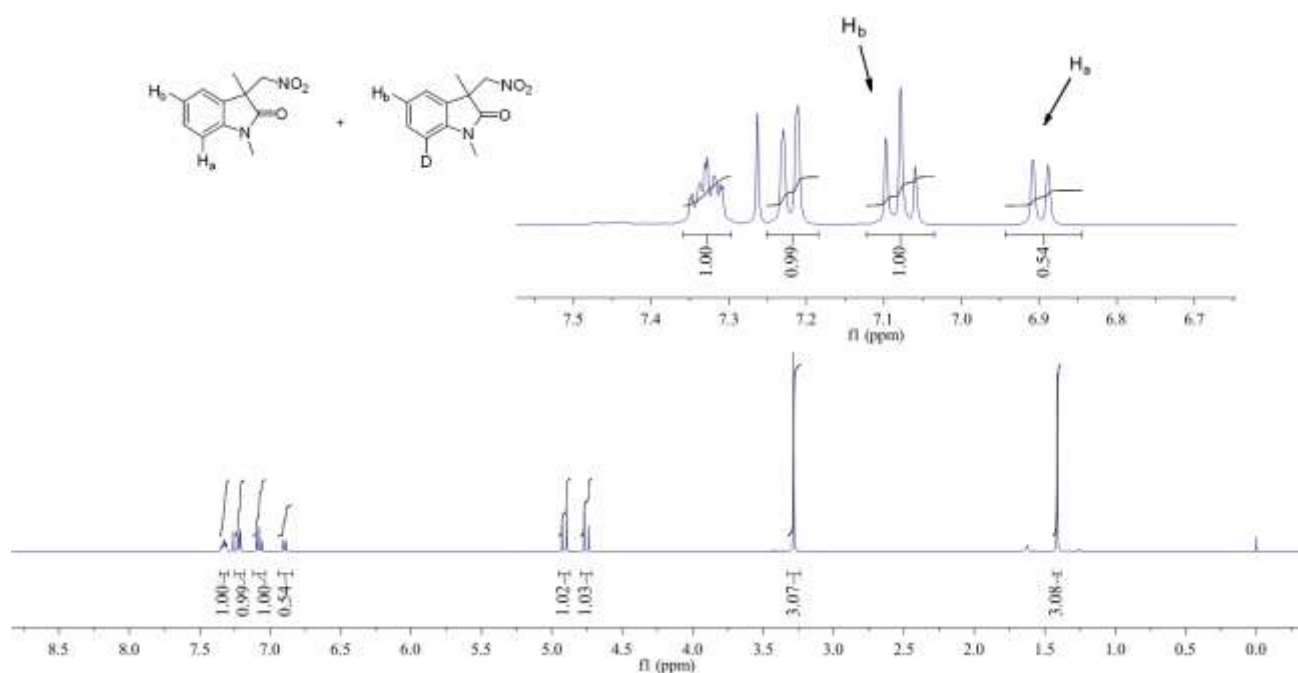

**Figure S1.**  $^1\text{H}$  NMR spectra of the mixture of compound **2a** and  $[\text{D}_1]\text{-2a}$ .

#### b) Intermolecular KIE experiment

$[\text{D}_5]\text{-1a}$  were synthesized deuterium substrates according the literature procedure.<sup>[S2]</sup> In a sealed tube, **1a** (35 mg, 0.20 mmol),  $[\text{D}_5]\text{-1a}$  (36 mg, 0.20 mmol),  $\text{NaNO}_2$  (55 mg, 0.80 mmol),  $\text{K}_2\text{S}_2\text{O}_8$  (216 mg, 0.80 mmol), and anhydrous  $\text{CH}_3\text{CN}$  (2 mL) were added. The mixture was allowed to stir at  $120^\circ\text{C}$  for 3 hours. The reaction was cooled to room temperature and diluted with EtOAc, then filtering through a bed of Celite. The filtered reaction mixture was concentrated by rotary evaporation and purified by column chromatography to give the product **2a** and  $[\text{D}_5]\text{-2a}$ . The products were under  $^1\text{H}$ -NMR analysis (Figure S2).

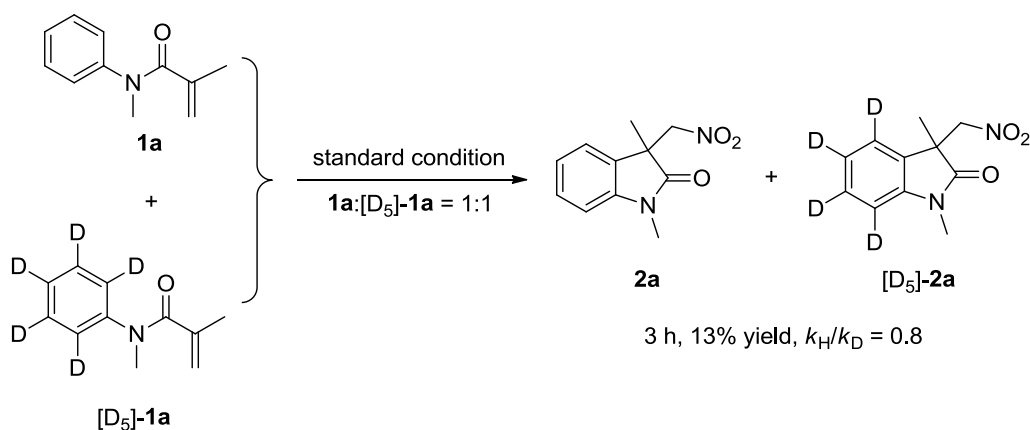

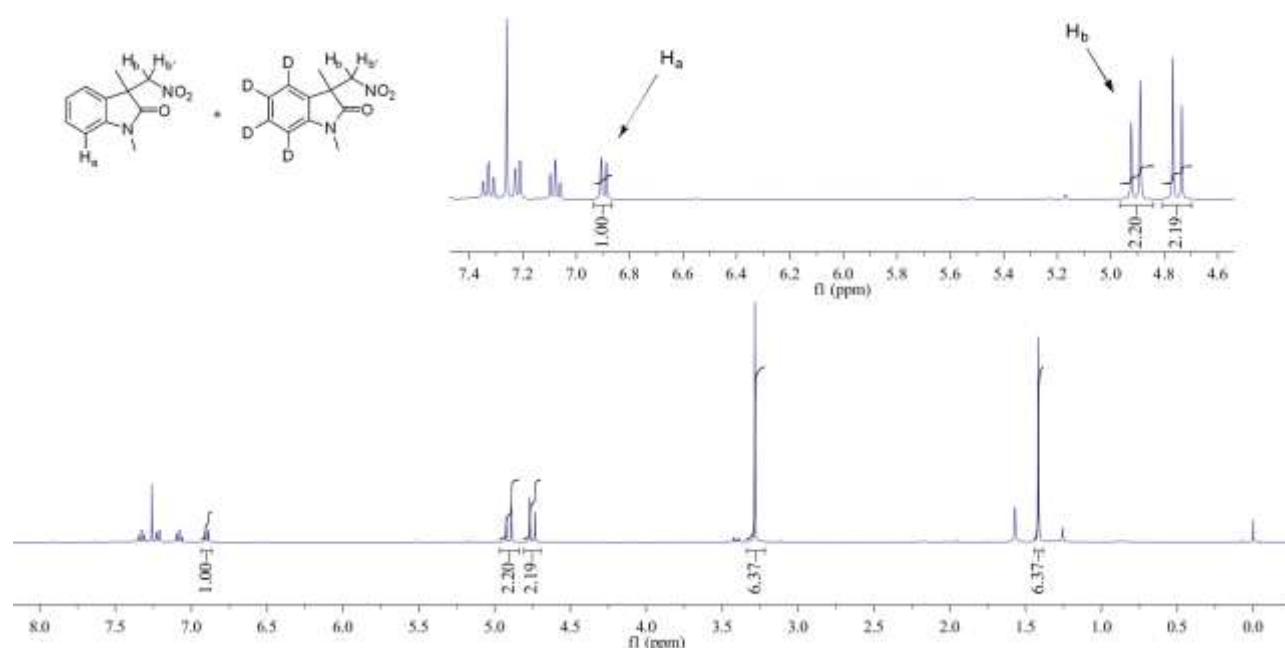

**Figure S2.**  $^1\text{H}$  NMR spectra of the mixture of compound **2a** and  $[\text{D}_5]\text{-2a}$ .

### c) Radical trapping experiment

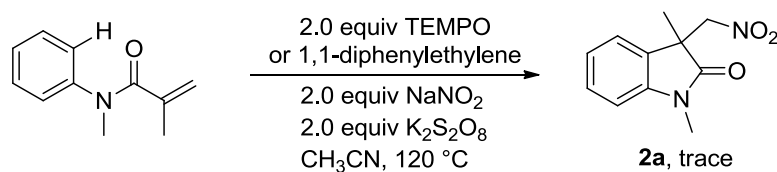

### 5. Synthesis of 1,3-dimethylindolin-2-one (**3a**)

To a solution of compound **2a** (220 mg, 1.0 mmol) in 6 mL of MeOH, 16 mL of a 0.5 M of  $\text{Na}_2\text{HPO}_4$  in a 1 N solution of NaOH were added. After 1 h, 2.0 mmol of Oxone in 3 mL of water were added to the stirred suspension. The resulting mixture was stirred at room temperature for 1 h, and was extracted with ethyl acetate. The organic layers was washed with brine and dried over  $\text{MgSO}_4$ . Concentration under reduced pressure and purification by silica gel flash chromatography to afford 1,3-dimethylindolin-2-one (103 mg, 64% yield). The NMR spectroscopy were consisted with previous report.<sup>[S3a]</sup>  $^1\text{H}$  NMR (400 MHz,  $\text{CDCl}_3$ ):  $\delta$  7.28-7.21 (m, 2H), 7.06-7.02 (m, 1H), 6.81 (d,  $J = 8.0$  Hz, 1H), 3.41 (q,  $J = 7.6$  Hz, 1H), 3.19 (s, 3H), 1.47 (d,  $J = 7.6$  Hz, 3H);  $^{13}\text{C}$  NMR (100 MHz,  $\text{CDCl}_3$ )  $\delta$  178.4, 143.8, 130.5, 127.7, 123.3, 122.2, 107.8, 40.3, 26.0, 15.2. ESI-MS:  $m/z = 162$  (M+H).

### 6. Synthesis of 3-hydroxy-1,3-dimethylindolin-2-one (**3b**)

The compound **2a** (220 mg, 1.0 mmol) in *t*-BuOH (2 mL) at  $25^\circ\text{C}$  was treated with aqueous buffered KOH (0.5 M in KOH and 1.25 M in  $\text{K}_2\text{HPO}_4$ , 2.5 mL). The mixture was stirred under nitrogen for 2 minutes and then aqueous  $\text{KMnO}_4$  (0.5 M, 8 mL, 4 mmol) was added with slight cooling to maintain the temperature at  $25^\circ\text{C}$ . After stirring for a further 60 min., saturated  $\text{Na}_2\text{SO}_3$  was added with cooling, and extracted with EtOAc. The extract was washed with brine and dried over  $\text{MgSO}_4$ . Concentration under reduced pressure and purification by silica gel flash chromatography to afford 3-hydroxy-1,3-dimethylindolin-2-one (135 mg, 76% yield). The NMR spectroscopy were consisted with previous report.<sup>[S3b]</sup>  $^1\text{H}$  NMR (400 MHz,  $\text{CDCl}_3$ ):  $\delta$  7.40 (d,  $J = 7.2$  Hz, 1H), 7.33-7.29 (m, 1H), 7.10 (t,  $J = 7.6$  Hz, 1H), 6.83 (d,  $J = 7.6$  Hz, 1H), 3.87 (s, 1H), 3.18 (s, 3H), 1.60 (s, 3H);  $^{13}\text{C}$  NMR (100 MHz,  $\text{CDCl}_3$ )  $\delta$  178.8, 142.7, 131.6, 129.4, 123.4, 123.2, 108.4, 73.6, 26.2, 24.7. ESI-MS:  $m/z = 178$  (M+H).

## 7. Synthesis of 3-(aminomethyl)-1,3-dimethylindolin-2-one (3c)

To a solution of compound **2a** (220 mg, 1.0 mmol) in methanol (6 mL) at 5 °C were added ammonium formate (252 mg, 4.0 mmol) and 10% palladium on carbon (33 mg). The reaction was allowed to warm to 25 °C, where it was stirred for 12 h. After this time, the reaction mixture was filtered through a bed of Celite. The filtrate was concentrated under reduced pressure to afford a crude residue and purified by column chromatography to give the product 3-(aminomethyl)-1,3-dimethylindolin-2-one (163 mg, 86% yield). The NMR spectroscopy were consisted with previous report.<sup>[S3c]</sup> <sup>1</sup>H NMR (400 MHz, CDCl<sub>3</sub>): δ 7.31-7.27 (m, 1H), 7.20 (d, *J* = 7.2 Hz, 1H), 7.08 (t, *J* = 7.2 Hz, 1H), 6.87 (d, *J* = 7.6 Hz, 1H), 3.23 (s, 3H), 3.10 (d, *J* = 12.8 Hz, 1H), 2.96 (d, *J* = 13.2 Hz, 1H), 1.37 (s, 2H), 1.34 (s, 3H); <sup>13</sup>C NMR (100 MHz, CDCl<sub>3</sub>) δ 179.5, 143.4, 132.1, 127.7, 122.2, 122.1, 107.1, 50.3, 49.0, 25.7, 19.8. ESI-MS: *m/z* = 191 (M+H).

## Reference:

- [S1] a) A. Pinto, Y. Jia, L. Neuville, J. Zhu, *Chem. Eur. J.* **2007**, *13*, 961-967; b) H. Wei, T. Piou, J. Dufour, L. Neuville, J. Zhu, *Org. Lett.*, **2011**, *13*, 2244-2247; c) X. Mu, T. Wu, H. Wang, Y. Guo, G. Liu, *J. Am. Chem. Soc.* **2012**, *134*, 878-881; d) S. Biro, R. Yeh, K. Raymond, *Angew. Chem., Int. Ed.* **2008**, *47*, 6062-6064; e) N. Campbell, A. Finch, S. Rokita, *ChemPhysChem* **2010**, *11*, 1768-1773; f) D. Walba, W. Thurmes, R. Haltiwanger, *J. Org. Chem.* **1988**, *53*, 1046-1056; g) C. Shaffer, S. Harriman, Y. Koen, R. Hanzlik, *J. Am. Chem. Soc.* **2001**, *123*, 8502-8508.
- [S2] a) A. Pinto, L. Neuville, P. Retailleau, J. Zhu, *Org. Lett.* **2006**, *8*, 4927-4930; b) I. J. S. Fairlamb, A. R. Kapdi, A. F. Lee, G. P. Mcglacken, F. Weissburger, A. H. M. de Vries, L. S. van de Vondervoort, *Chem. Eur. J.* **2006**, *12*, 8750-8761.
- [S3] a) K. H. Shaughnessy, B. C. Hamann and J. F. Hartwig, *J. Org. Chem.* **1998**, *63*, 6546-6553; b) I. Gorokhovik, L. Neuville and J. Zhu *Org. Lett.* **2011**, *13*, 5536-5539; c) K. Matcha, R. Narayan, A. P. Antonchick, *Angew. Chem. Int. Ed.* **2013**, *52*, 7985-7989.

## 8. Characterization of new compounds.

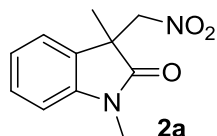

<sup>1</sup>H NMR (400 MHz, CDCl<sub>3</sub>): δ 7.33 (dt, *J* = 0.8 Hz, 7.6 Hz, 1H), 7.23-7.21 (m, 1H), 7.08 (dt, *J* = 0.8 Hz, 8.0 Hz, 1H), 6.90 (d, *J* = 8.0 Hz, 1H), 4.91 (d, *J* = 13.2 Hz, 1H), 4.76 (d, *J* = 13.2 Hz, 1H), 3.28 (s, 3H), 1.41 (s, 3H); <sup>13</sup>C NMR (100 MHz, CDCl<sub>3</sub>) δ 177.1, 143.5, 129.2, 129.1, 122.9, 122.4, 108.8, 79.0, 47.0, 26.6, 21.7. IR (film) *ν*<sub>max</sub>: 3441, 2080, 1639, 1556, 1371, 1249, 1126, 741, 701, 647 cm<sup>-1</sup>. HRMS calc. for C<sub>11</sub>H<sub>12</sub>N<sub>2</sub>O<sub>3</sub> (M+H)<sup>+</sup>, 221.0921; found, 221.0918.

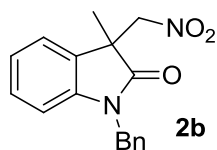

<sup>1</sup>H NMR (400 MHz, CDCl<sub>3</sub>): δ 7.36-7.31 (m, 4H), 7.28-7.25 (m, 1H), 7.22-7.16 (m, 2H), 7.02 (t, *J* = 7.2 Hz, 1H), 6.75 (d, *J* = 7.6 Hz, 1H), 5.06-4.91 (m, 3H), 4.81 (d, *J* = 13.6 Hz, 1H), 1.45 (s, 3H); <sup>13</sup>C NMR (100 MHz, CDCl<sub>3</sub>) δ 177.3, 142.6, 135.4, 129.1, 129.0, 128.8, 127.6, 127.2, 122.9, 122.3, 109.9, 78.6, 47.1, 44.1, 22.3. IR (film) *ν*<sub>max</sub>: 2928, 2564, 1900, 1745, 1613, 1555, 1490, 1454, 1384, 1182, 754, 650 cm<sup>-1</sup>. HRMS calc. for C<sub>17</sub>H<sub>16</sub>N<sub>2</sub>O<sub>3</sub> (M+H)<sup>+</sup>, 297.1234; found, 297.1237.

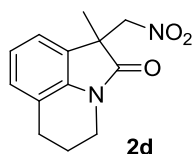

$^1\text{H}$  NMR (400 MHz,  $\text{CDCl}_3$ ):  $\delta$  7.06 (dd,  $J = 3.2$  Hz, 7.6 Hz, 2H), 6.95 (t,  $J = 7.6$  Hz, 1H), 4.88 (d,  $J = 13.2$  Hz, 1H), 4.75 (d,  $J = 13.2$  Hz, 1H), 3.83-3.72 (m, 2H), 2.79 (t,  $J = 6.0$  Hz, 2H), 2.06-2.01 (m, 2H), 1.42 (s, 3H);  $^{13}\text{C}$  NMR (100 MHz,  $\text{CDCl}_3$ )  $\delta$  175.8, 139.2, 128.0, 127.6, 122.3, 120.8, 120.8, 120.3, 79.1, 48.2, 39.1, 24.4, 21.3, 21.0. IR (film)  $\nu_{\text{max}}$ : 3450, 2929, 2873, 1711, 1629, 1554, 1483, 1388, 1357, 1244, 1169, 783, 639  $\text{cm}^{-1}$ . HRMS calc. for  $\text{C}_{13}\text{H}_{14}\text{N}_2\text{O}_3$  ( $\text{M}+\text{H}$ ) $^+$ , 247.1077; found, 247.1079.

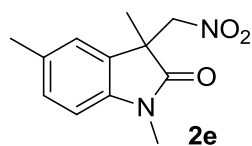

$^1\text{H}$  NMR (400 MHz,  $\text{CDCl}_3$ ):  $\delta$  7.12 (d,  $J = 8.0$  Hz, 1H), 7.03 (s, 1H), 6.78 (d,  $J = 7.6$  Hz, 1H), 4.90 (d,  $J = 13.6$  Hz, 1H), 4.74 (d,  $J = 13.6$  Hz, 1H), 3.26 (s, 3H), 2.33 (s, 3H), 1.39 (s, 3H);  $^{13}\text{C}$  NMR (100 MHz,  $\text{CDCl}_3$ )  $\delta$  177.1, 141.1, 132.5, 129.4, 129.1, 123.2, 108.5, 79.0, 47.0, 26.6, 21.8, 21.0. IR (film)  $\nu_{\text{max}}$ : 3449, 2928, 2079, 1742, 1622, 1555, 1502, 1383, 1250, 1124, 812, 643, 556  $\text{cm}^{-1}$ . HRMS calc. for  $\text{C}_{12}\text{H}_{14}\text{N}_2\text{O}_3$  ( $\text{M}+\text{H}$ ) $^+$ , 235.1077; found, 235.1080.

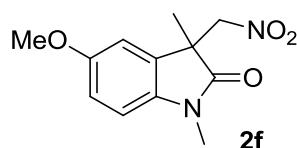

$^1\text{H}$  NMR (400 MHz,  $\text{CDCl}_3$ ):  $\delta$  6.85-6.78 (m, 1H), 4.90 (d,  $J = 13.6$  Hz, 1H), 4.74 (d,  $J = 13.6$  Hz, 1H), 3.77 (s, 3H), 3.25 (s, 3H), 1.39 (s, 3H);  $^{13}\text{C}$  NMR (100 MHz,  $\text{CDCl}_3$ )  $\delta$  176.7, 156.1, 136.9, 130.4, 113.1, 110.2, 109.1, 78.9, 55.7, 47.4, 26.6, 21.7. IR (film)  $\nu_{\text{max}}$ : 3457, 2960, 2079, 1638, 1554, 1382, 1291, 1212, 1122, 1037, 806, 736  $\text{cm}^{-1}$ . HRMS calc. for  $\text{C}_{12}\text{H}_{14}\text{N}_2\text{O}_4$  ( $\text{M}+\text{H}$ ) $^+$ , 251.1026; found, 251.1030.

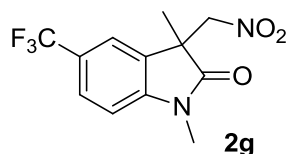

$^1\text{H}$  NMR (400 MHz,  $\text{CDCl}_3$ ):  $\delta$  7.63 (d,  $J = 8.0$  Hz, 1H), 7.46 (s, 1H), 6.90 (d,  $J = 8.0$  Hz, 1H), 4.97 (d,  $J = 14.0$  Hz, 1H), 4.81 (d,  $J = 14.0$  Hz, 1H), 3.33 (s, 3H), 1.43 (s, 3H);  $^{13}\text{C}$  NMR (100 MHz,  $\text{CDCl}_3$ )  $\delta$  177.1, 146.6, 129.9, 127.0 (q,  $J_{\text{C-F}} = 4.0$  Hz), 125.1 (q,  $J_{\text{C-F}} = 32.0$  Hz), 124.1 (q,  $J_{\text{C-F}} = 270.0$  Hz), 119.4 (q,  $J_{\text{C-F}} = 4.0$  Hz), 108.6, 78.5, 46.9, 26.8, 21.6;  $^{19}\text{F}$  NMR (376 MHz,  $\text{CDCl}_3$ ):  $\delta$  -61.48. IR (film)  $\nu_{\text{max}}$ : 3447, 2952, 2079, 1726, 1627, 1558, 1457, 1376, 1276, 1163, 1118, 1064, 905, 825  $\text{cm}^{-1}$ . HRMS calc. for  $\text{C}_{12}\text{H}_{11}\text{F}_3\text{N}_2\text{O}_3$  ( $\text{M}+\text{H}$ ) $^+$ , 289.0795; found, 289.0802.

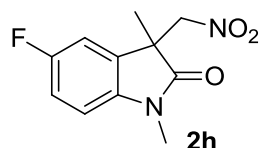

$^1\text{H}$  NMR (400 MHz,  $\text{CDCl}_3$ ):  $\delta$  7.07-6.98 (m, 2H), 6.83 (dd,  $J = 4.0$  Hz, 8.4 Hz, 1H), 4.93 (d,  $J = 13.6$  Hz, 1H), 4.74 (d,  $J = 13.6$  Hz, 1H), 3.28 (s, 3H), 1.41 (s, 3H);  $^{13}\text{C}$  NMR (100 MHz,  $\text{CDCl}_3$ )  $\delta$  176.8, 159.3 (d,  $J_{\text{C-F}} = 241$  Hz), 139.5, 130.7 (d,  $J_{\text{C-F}} = 8$  Hz), 115.5 (d,  $J_{\text{C-F}} = 23$  Hz), 110.9 (d,  $J_{\text{C-F}} = 25$  Hz), 109.4 (d,  $J_{\text{C-F}} = 8$  Hz), 78.7, 47.4, 26.8, 21.7;  $^{19}\text{F}$  NMR (376 MHz,  $\text{CDCl}_3$ ):  $\delta$  -119.61. IR (film)  $\nu_{\text{max}}$ : 3441, 2083, 1638, 1558, 1496, 1469, 1381, 1278, 1117, 695, 613  $\text{cm}^{-1}$ . HRMS calc. for  $\text{C}_{11}\text{H}_{11}\text{FN}_2\text{O}_3$  ( $\text{M}+\text{H}$ ) $^+$ , 239.0829; found, 239.0826.

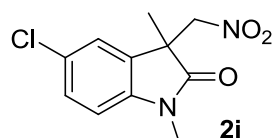

$^1\text{H}$  NMR (400 MHz,  $\text{CDCl}_3$ ):  $\delta$  7.31 (dd,  $J = 2.0$  Hz, 8.4 Hz, 1H), 7.21 (d,  $J = 2.0$  Hz, 1H), 6.83 (d,  $J = 8.4$  Hz, 1H), 4.93 (d,  $J = 14.0$  Hz, 1H), 4.70 (d,  $J = 14.0$  Hz, 1H), 3.28 (s, 3H), 1.41 (s, 3H);  $^{13}\text{C}$  NMR (100 MHz,  $\text{CDCl}_3$ )  $\delta$  176.7, 130.8,

129.2, 128.3, 123.0, 109.8, 78.6, 47.1, 26.8, 21.7. IR (film)  $\nu_{\max}$ : 3438, 2083, 1637, 1556, 1492, 1460, 1422, 1363, 1274, 1248, 1164, 1130, 811, 711, 640  $\text{cm}^{-1}$ . HRMS calc. for  $\text{C}_{11}\text{H}_{11}\text{ClN}_2\text{O}_3$  ( $\text{M}+\text{H}$ )<sup>+</sup>, 255.0531; found, 255.0536.

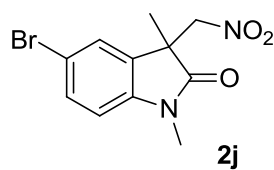

<sup>1</sup>H NMR (400 MHz,  $\text{CDCl}_3$ ):  $\delta$  7.46 (d,  $J$  = 2.0 Hz, 1H), 7.34 (d,  $J$  = 2.0 Hz, 1H), 6.79 (d,  $J$  = 8.4 Hz, 1H), 4.93 (d,  $J$  = 13.6 Hz, 1H), 4.74 (d,  $J$  = 14.0 Hz, 1H), 3.27 (s, 3H), 1.40 (s, 3H); <sup>13</sup>C NMR (100 MHz,  $\text{CDCl}_3$ )  $\delta$  176.6, 142.6, 132.1, 131.2, 125.7, 115.4, 110.3, 78.6, 47.0, 26.7, 21.7. IR (film)  $\nu_{\max}$ : 3447, 2085, 1711, 1638, 1555, 1491, 1420, 1347, 1128, 811, 710, 638  $\text{cm}^{-1}$ . HRMS calc. for  $\text{C}_{11}\text{H}_{11}\text{BrN}_2\text{O}_3$  ( $\text{M}+\text{H}$ )<sup>+</sup>, 299.0026; found, 299.0030.

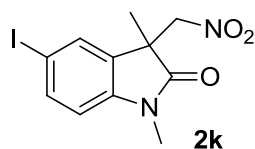

<sup>1</sup>H NMR (400 MHz,  $\text{CDCl}_3$ ):  $\delta$  7.65 (dd,  $J$  = 2.0 Hz, 8.4 Hz, 1H), 7.50 (d,  $J$  = 2.0 Hz, 1H), 6.69 (d,  $J$  = 8.0 Hz, 1H), 4.92 (d,  $J$  = 13.6 Hz, 1H), 4.73 (d,  $J$  = 14.0 Hz, 1H), 3.26 (s, 3H), 1.39 (s, 3H); <sup>13</sup>C NMR (100 MHz,  $\text{CDCl}_3$ )  $\delta$  176.4, 143.3, 138.0, 131.6, 131.1, 110.8, 85.1, 78.5, 46.8, 26.7, 21.7. IR (film)  $\nu_{\max}$ : 3448, 2086, 1640, 1554, 1489, 1459, 1345, 1247, 1126, 809, 707, 637  $\text{cm}^{-1}$ . ESI-MS:  $m/z$  = 347 ( $\text{M}+\text{H}$ )<sup>+</sup>

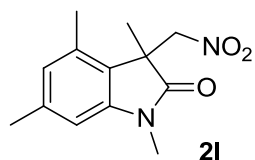

<sup>1</sup>H NMR (400 MHz,  $\text{CDCl}_3$ ):  $\delta$  6.65 (s, 1H), 6.55 (s, 1H), 5.02-4.92 (m, 2H), 3.25 (s, 3H), 2.35 (s, 3H), 2.32 (s, 3H), 1.43 (s, 3H); <sup>13</sup>C NMR (100 MHz,  $\text{CDCl}_3$ )  $\delta$  177.6, 144.0, 139.2, 133.7, 125.9, 122.9, 107.5, 78.4, 47.8, 26.6, 21.5, 19.6, 17.9. IR (film)  $\nu_{\max}$ : 3445, 3032, 2936, 2086, 1710, 1622, 1551, 1453, 1386, 1339, 1152, 1066, 841, 665, 596  $\text{cm}^{-1}$ . HRMS calc. for  $\text{C}_{13}\text{H}_{16}\text{N}_2\text{O}_3$  ( $\text{M}+\text{H}$ )<sup>+</sup>, 249.1234; found, 249.1237.

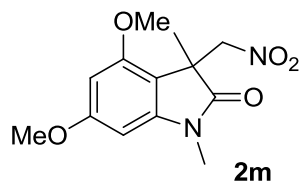

<sup>1</sup>H NMR (400 MHz,  $\text{CDCl}_3$ ):  $\delta$  6.15 (d,  $J$  = 2.0 Hz, 1H), 6.12 (d,  $J$  = 1.6 Hz, 1H), 5.04 (d,  $J$  = 13.2 Hz, 1H), 4.85 (d,  $J$  = 12.8 Hz, 1H), 3.82 (s, 3H), 3.81 (s, 3H), 3.23 (s, 3H), 1.40 (s, 3H); <sup>13</sup>C NMR (100 MHz,  $\text{CDCl}_3$ )  $\delta$  178.3, 162.3, 156.6, 145.6, 106.6, 92.5, 89.0, 77.9, 55.6, 55.5, 47.0, 26.8, 19.7. IR (film)  $\nu_{\max}$ : 3446, 2935, 2084, 1719, 1623, 1555, 1457, 1335, 1257, 1213, 1154, 815, 737, 643  $\text{cm}^{-1}$ . HRMS calc. for  $\text{C}_{13}\text{H}_{16}\text{N}_2\text{O}_5$  ( $\text{M}+\text{H}$ )<sup>+</sup>, 281.1132; found, 281.1139.

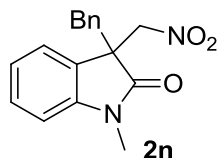

<sup>1</sup>H NMR (400 MHz,  $\text{CDCl}_3$ ):  $\delta$  7.27-7.23 (m, 1H), 7.16-7.03 (m, 5H), 6.81-6.79 (m, 2H), 6.64 (d,  $J$  = 7.6 Hz, 1H), 5.09 (d,  $J$  = 13.6 Hz, 1H), 4.87 (d,  $J$  = 13.6 Hz, 1H), 3.03-3.02 (m, 5H); <sup>13</sup>C NMR (100 MHz,  $\text{CDCl}_3$ )  $\delta$  175.9, 144.1, 133.1, 130.0, 129.3, 127.8, 127.3, 126.4, 123.3, 122.4, 108.5, 78.1, 52.6, 41.4, 26.2. IR (film)  $\nu_{\max}$ : 3456, 2922, 2092, 1713,

1614, 1555, 1495, 1471, 1379, 1256, 1096, 752, 701  $\text{cm}^{-1}$ . HRMS calc. for  $\text{C}_{17}\text{H}_{16}\text{N}_2\text{O}_3$  ( $\text{M}+\text{H}$ ) $^{+}$ , 297.1234; found, 137.1241.

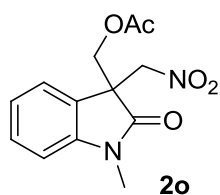

$^1\text{H}$  NMR (400 MHz,  $\text{CDCl}_3$ ):  $\delta$  7.37 (t,  $J$  = 8.0 Hz, 1H), 7.27 (d,  $J$  = 7.2 Hz, 1H), 7.08 (t,  $J$  = 7.6 Hz, 1H), 6.92 (d,  $J$  = 7.6 Hz, 1H), 5.06-4.97 (m, 2H), 4.39 (d,  $J$  = 11.2 Hz, 1H), 4.14 (d,  $J$  = 11.2 Hz, 1H), 3.29 (s, 3H), 2.04 (s, 3H);  $^{13}\text{C}$  NMR (100 MHz,  $\text{CDCl}_3$ )  $\delta$  173.8, 169.8, 144.1, 130.0, 125.0, 123.6, 123.0, 109.0, 76.0, 64.9, 50.8, 26.7, 20.5. IR (film)  $\nu_{\text{max}}$ : 3456, 2924, 2736, 2254, 1713, 1613, 1555, 1469, 1377, 1224, 1155, 1049, 734  $\text{cm}^{-1}$ . HRMS calc. for  $\text{C}_{13}\text{H}_{14}\text{N}_2\text{O}_5$  ( $\text{M}+\text{H}$ ) $^{+}$ , 279.0975; found, 279.0977.

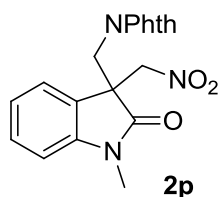

$^1\text{H}$  NMR (400 MHz,  $\text{CDCl}_3$ ):  $\delta$  7.87-7.85 (m, 2H), 7.76-7.74 (m, 2H), 7.35 (dt,  $J$  = 8.0 Hz, 0.8 Hz, 1H), 7.18 (d,  $J$  = 7.2 Hz, 1H), 7.03 (t,  $J$  = 7.6 Hz, 1H), 6.92 (d,  $J$  = 7.6 Hz, 1H), 5.15 (d,  $J$  = 2.0 Hz, 2H), 4.01 (d,  $J$  = 14.4 Hz, 1H), 3.92 (d,  $J$  = 14.4 Hz, 1H), 3.30 (s, 3H);  $^{13}\text{C}$  NMR (100 MHz,  $\text{CDCl}_3$ )  $\delta$  174.4, 168.0, 144.1, 134.4, 131.5, 130.0, 125.5, 123.8, 122.9, 122.8, 109.2, 76.9, 51.0, 41.3, 26.8. IR (film)  $\nu_{\text{max}}$ : 3452, 2958, 2924, 2091, 1643, 1465, 1377, 1216, 1157, 759, 668  $\text{cm}^{-1}$ . HRMS calc. for  $\text{C}_{19}\text{H}_{15}\text{N}_3\text{O}_5$  ( $\text{M}+\text{H}$ ) $^{+}$ , 366.1084; found, 366.1086.

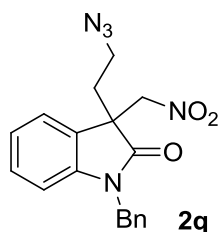

$^1\text{H}$  NMR (400 MHz,  $\text{CDCl}_3$ ):  $\delta$  7.34-7.20 (m, 7H), 7.07-7.03 (m, 1H), 6.80 (d,  $J$  = 8.0 Hz, 1H), 5.03-4.83 (m, 4H), 3.15-3.01 (m, 2H), 2.23-2.16 (m, 1H), 2.07-2.00 (m, 1H);  $^{13}\text{C}$  NMR (100 MHz,  $\text{CDCl}_3$ )  $\delta$  175.8, 143.3, 135.2, 129.7, 128.8, 127.8, 127.4, 125.9, 123.1, 122.9, 110.0, 78.6, 49.7, 46.2, 44.4, 34.2. IR (film)  $\nu_{\text{max}}$ : 3436, 2924, 2102, 1715, 1613, 1556, 1490, 1468, 1379, 1179, 754, 699, 651, 554  $\text{cm}^{-1}$ . HRMS calc. for  $\text{C}_{18}\text{H}_{17}\text{N}_5\text{O}_3$  ( $\text{M}+\text{H}$ ) $^{+}$ , 352.1404; found, 352.1410.

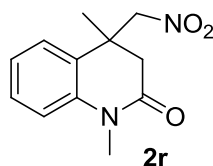

$^1\text{H}$  NMR (400 MHz,  $\text{CDCl}_3$ ):  $\delta$  7.39-7.35 (m, 1H), 7.29 (dd,  $J$  = 1.2 Hz, 7.2 Hz, 1H), 7.15-7.07 (m, 2H), 4.52-4.43 (m, 2H), 3.42 (s, 3H), 2.88 (d,  $J$  = 16.4 Hz, 1H), 2.62 (d,  $J$  = 16.4 Hz, 1H), 1.58 (s, 3H);  $^{13}\text{C}$  NMR (100 MHz,  $\text{CDCl}_3$ )  $\delta$  167.4, 139.4, 129.4, 127.5, 123.7, 115.5, 81.7, 41.8, 37.2, 29.5, 23.1. IR (film)  $\nu_{\text{max}}$ : 3458, 2974, 2100, 1675, 1601, 1550, 1456, 1420, 1373, 1154, 935, 858, 759, 499  $\text{cm}^{-1}$ . HRMS calc. for  $\text{C}_{12}\text{H}_{14}\text{N}_2\text{O}_3$  ( $\text{M}+\text{H}$ ) $^{+}$ , 235.1077; found, 235.1077.

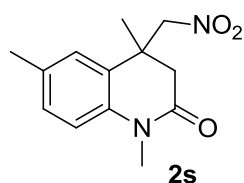

$^1\text{H}$  NMR (400 MHz,  $\text{CDCl}_3$ ):  $\delta$  7.16 (d,  $J = 8.4$  Hz, 1H), 7.07 (s, 1H), 6.96 (d,  $J = 8.0$  Hz, 1H), 4.49-4.41 (m, 2H), 3.39 (s, 3H), 2.86 (d,  $J = 16.4$  Hz, 1H), 2.62 (d,  $J = 16.4$  Hz, 1H), 2.34 (s, 3H), 1.56 (s, 3H);  $^{13}\text{C}$  NMR (100 MHz,  $\text{CDCl}_3$ )  $\delta$  167.3, 137.1, 133.3, 129.6, 127.4, 125.8, 115.4, 81.8, 41.9, 37.2, 29.5, 23.2, 20.8. IR (film)  $\nu_{\text{max}}$ : 3446, 2966, 2924, 2085, 1648, 1551, 1463, 1416, 1369, 1143, 814, 732  $\text{cm}^{-1}$ . HRMS calc. for  $\text{C}_{13}\text{H}_{16}\text{N}_2\text{O}_3$  ( $\text{M}+\text{H}$ ) $^+$ , 249.1234; found, 249.1235.

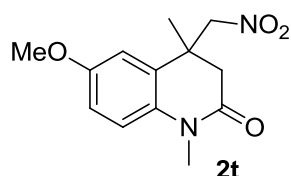

$^1\text{H}$  NMR (400 MHz,  $\text{CDCl}_3$ ):  $\delta$  6.99 (d,  $J = 8.4$  Hz, 1H), 6.89-6.84 (m, 2H), 4.50-4.42 (m, 2H), 3.81 (s, 3H), 3.38 (s, 3H), 2.84 (d,  $J = 16.4$  Hz, 1H), 2.61 (d,  $J = 16.0$  Hz, 1H), 1.55 (s, 3H);  $^{13}\text{C}$  NMR (100 MHz,  $\text{CDCl}_3$ )  $\delta$  166.9, 155.8, 133.0, 129.1, 116.4, 113.0, 112.0, 81.7, 55.6, 41.8, 37.3, 29.6, 23.1. IR (film)  $\nu_{\text{max}}$ : 3445, 2962, 2074, 1642, 1553, 1509, 1462, 1374, 1245, 811, 753, 625, 604, 565  $\text{cm}^{-1}$ . HRMS calc. for  $\text{C}_{13}\text{H}_{16}\text{N}_2\text{O}_4$  ( $\text{M}+\text{H}$ ) $^+$ , 265.1183; found, 265.1185.

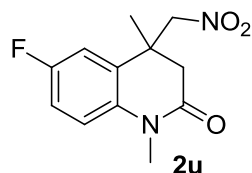

$^1\text{H}$  NMR (400 MHz,  $\text{CDCl}_3$ ):  $\delta$  7.08-6.99 (m, 3H), 4.49-4.42 (m, 2H), 3.39 (s, 3H), 2.84 (d,  $J = 16.4$  Hz, 1H), 2.63 (d,  $J = 16.0$  Hz, 1H), 1.55 (s, 3H);  $^{13}\text{C}$  NMR (100 MHz,  $\text{CDCl}_3$ )  $\delta$  166.9, 158.9 (d,  $J_{\text{C-F}} = 243.0$  Hz), 135.8, 129.6 (d,  $J_{\text{C-F}} = 7.0$  Hz), 116.8 (d,  $J_{\text{C-F}} = 8.0$  Hz), 115.6 (d,  $J_{\text{C-F}} = 22.0$  Hz), 112.8 (d,  $J_{\text{C-F}} = 25.0$  Hz), 81.4, 41.7, 73.2, 29.7, 23.1;  $^{19}\text{F}$  NMR (376 MHz,  $\text{CDCl}_3$ ):  $\delta$  -118.59. IR (film)  $\nu_{\text{max}}$ : 3454, 2962, 2926, 2081, 1733, 1640, 1413, 1351, 1271, 1244, 1110, 1078, 890, 730, 665  $\text{cm}^{-1}$ . HRMS calc. for  $\text{C}_{12}\text{H}_{13}\text{FN}_2\text{O}_3$  ( $\text{M}+\text{H}$ ) $^+$ , 253.0983; found, 253.0987.

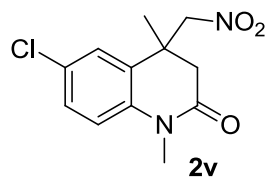

$^1\text{H}$  NMR (400 MHz,  $\text{CDCl}_3$ ):  $\delta$  7.33 (dd,  $J = 8.8$  Hz, 2.0 Hz, 1H), 7.25 (d,  $J = 2.0$  Hz, 1H), 7.00 (d,  $J = 8.8$  Hz, 1H), 4.50-4.42 (m, 2H), 3.39 (s, 3H), 2.87 (d,  $J = 16.4$  Hz, 1H), 2.64 (d,  $J = 16.4$  Hz, 1H), 1.57 (s, 3H);  $^{13}\text{C}$  NMR (100 MHz,  $\text{CDCl}_3$ )  $\delta$  167.0, 138.1, 129.3, 129.1, 125.6, 116.8, 81.4, 41.6, 37.2, 29.6, 23.1. IR (film)  $\nu_{\text{max}}$ : 3451, 2959, 2922, 2073, 1676, 1550, 1494, 1470, 1414, 1358, 1274, 1140, 876, 719  $\text{cm}^{-1}$ . HRMS calc. for  $\text{C}_{12}\text{H}_{13}\text{ClN}_2\text{O}_3$  ( $\text{M}+\text{H}$ ) $^+$ , 269.0687; found, 269.0689.

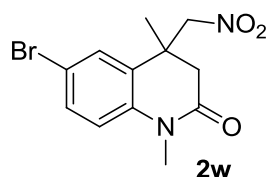

$^1\text{H}$  NMR (400 MHz,  $\text{CDCl}_3$ ):  $\delta$  7.48 (dd,  $J = 8.8$  Hz, 0.8 Hz, 1H), 7.38 (d,  $J = 1.6$  Hz, 1H), 6.94 (d,  $J = 8.8$  Hz, 1H),

4.50-4.42 (m, 2H), 3.38 (s, 3H), 2.87 (d,  $J = 16.4$  Hz, 1H), 2.63 (d,  $J = 16.4$  Hz, 1H), 1.56 (s, 3H);  $^{13}\text{C}$  NMR (100 MHz,  $\text{CDCl}_3$ )  $\delta$  167.0, 138.7, 132.1, 129.7, 128.4, 117.1, 116.5, 81.5, 41.6, 37.2, 29.6, 23.1. IR (film)  $\nu_{\text{max}}$ : 3441, 2080, 1641, 1467, 1409, 1353, 1241, 1140, 717, 647  $\text{cm}^{-1}$ . HRMS calc. for  $\text{C}_{12}\text{H}_{13}\text{BrN}_2\text{O}_3$  ( $\text{M}+\text{H}$ ) $^+$ , 313.0182; found, 313.0184.

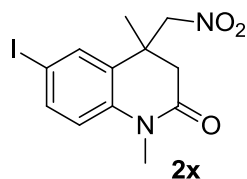

$^1\text{H}$  NMR (400 MHz,  $\text{CDCl}_3$ ):  $\delta$  7.66 (dd,  $J = 8.4$  Hz, 2.0 Hz, 1H), 7.54 (d,  $J = 2.0$  Hz, 1H), 6.82 (d,  $J = 8.8$  Hz, 1H), 4.49-4.41 (m, 2H), 3.37 (s, 3H), 2.86 (d,  $J = 16.4$  Hz, 1H), 2.62 (d,  $J = 16.4$  Hz, 1H), 1.56 (s, 3H);  $^{13}\text{C}$  NMR (100 MHz,  $\text{CDCl}_3$ )  $\delta$  167.0, 139.4, 138.1, 134.1, 129.9, 117.5, 86.8, 81.5, 41.6, 37.1, 29.5, 23.1. IR (film)  $\nu_{\text{max}}$ : 3446, 2967, 2079, 1733, 1641, 1412, 1271, 1244, 1111, 1078, 890, 738  $\text{cm}^{-1}$ . HRMS calc. for  $\text{C}_{12}\text{H}_{13}\text{IN}_2\text{O}_3$  ( $\text{M}+\text{H}$ ) $^+$ , 361.0044; found, 361.0046.

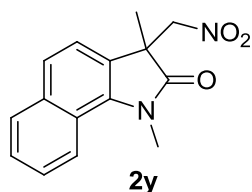

$^1\text{H}$  NMR (400 MHz,  $\text{CDCl}_3$ ):  $\delta$  7.76 (d,  $J = 8.0$  Hz, 1H), 7.54-7.48 (m, 3H), 7.34 (d,  $J = 8.0$  Hz, 1H), 7.05 (d,  $J = 8.0$  Hz, 1H), 5.69 (d,  $J = 16.0$  Hz, 1H), 4.98 (d,  $J = 16.0$  Hz, 1H), 3.61 (s, 3H), 1.59 (s, 3H);  $^{13}\text{C}$  NMR (100 MHz,  $\text{CDCl}_3$ )  $\delta$  170.7, 136.2, 134.0, 133.7, 127.2, 126.8, 123.0, 121.2, 119.2, 109.3, 81.5, 46.7, 30.1, 29.1. IR (film)  $\nu_{\text{max}}$ : 3444, 3030, 2924, 1651, 1589, 1548, 1453, 1424, 1380, 1322, 1281, 822, 771  $\text{cm}^{-1}$ . HRMS calc. for  $\text{C}_{15}\text{H}_{14}\text{N}_2\text{O}_3$  ( $\text{M}+\text{H}$ ) $^+$ , 271.1077; found, 271.1089.

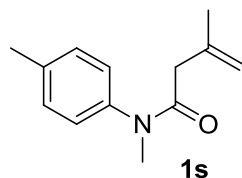

$^1\text{H}$  NMR (400 MHz,  $\text{CDCl}_3$ ):  $\delta$  7.20 (d,  $J = 8.0$  Hz, 2H), 7.07 (d,  $J = 8.4$  Hz, 2H), 4.82 (s, 1H), 4.63 (s, 1H), 3.26 (s, 3H), 2.84 (s, 2H), 2.38 (s, 3H), 1.70 (s, 3H);  $^{13}\text{C}$  NMR (100 MHz,  $\text{CDCl}_3$ )  $\delta$  170.7, 141.6, 140.0, 137.6, 130.2, 127.0, 113.5, 42.8, 37.4, 22.6, 21.0. IR (film)  $\nu_{\text{max}}$ : 3428, 2923, 1660, 1515, 1433, 1375, 1258, 1122, 891, 826, 723, 558  $\text{cm}^{-1}$ . ESI-MS:  $m/z = 226$  ( $\text{M}+\text{Na}$ ) $^+$ .

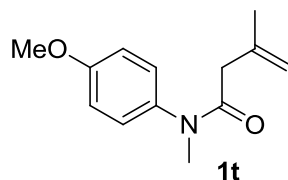

$^1\text{H}$  NMR (400 MHz,  $\text{CDCl}_3$ ):  $\delta$  7.11 (d,  $J = 8.8$  Hz, 2H), 6.91 (d,  $J = 8.8$  Hz, 2H), 4.81 (s, 1H), 4.63 (s, 1H), 3.83 (s, 3H), 3.25 (s, 3H), 2.84 (s, 2H), 1.70 (s, 3H);  $^{13}\text{C}$  NMR (100 MHz,  $\text{CDCl}_3$ )  $\delta$  170.9, 158.8, 140.0, 136.9, 128.2, 114.6, 113.4, 55.3, 42.7, 37.4, 22.6. IR (film)  $\nu_{\text{max}}$ : 3428, 2922, 1666, 1512, 1437, 1377, 1298, 1248, 1189, 1123, 1032, 893, 839, 733  $\text{cm}^{-1}$ . ESI-MS:  $m/z = 220$  ( $\text{M}+\text{H}$ ) $^+$ .

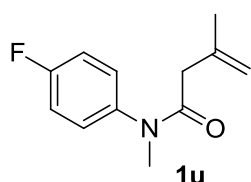

$^1\text{H}$  NMR (400 MHz,  $\text{CDCl}_3$ ):  $\delta$  7.22-7.19 (m, 2H), 7.12-7.88 (m, 2H), 4.82 (s, 1H), 4.62 (s, 1H), 3.26 (s, 3H), 2.84 (s, 2H), 1.70 (s, 3H);  $^{13}\text{C}$  NMR (100 MHz,  $\text{CDCl}_3$ )  $\delta$  170.5, 161.6 (d,  $J_{\text{C-F}} = 247.0$  Hz), 140.0 (d,  $J_{\text{C-F}} = 3.0$  Hz), 139.6, 128.9 (d,  $J_{\text{C-F}} = 9.0$  Hz), 116.4 (d,  $J_{\text{C-F}} = 23.0$  Hz), 113.5, 42.8, 37.3, 22.5.  $^{19}\text{F}$  NMR (376 MHz,  $\text{CDCl}_3$ ):  $\delta$  -113.47. IR (film)  $\nu_{\text{max}}$ : 3418, 3077, 1661, 1510, 1433, 1376, 1311, 1223, 1123, 1016, 895, 845, 590  $\text{cm}^{-1}$ . ESI-MS:  $m/z = 208$  ( $\text{M}+\text{H}$ ) $^+$ .

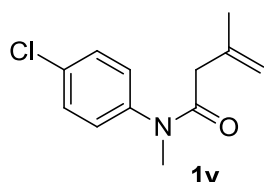

$^1\text{H}$  NMR (400 MHz,  $\text{CDCl}_3$ ):  $\delta$  7.38 (d,  $J = 8.8$  Hz, 2H), 7.16 (d,  $J = 8.4$  Hz, 2H), 4.83 (s, 1H), 4.63 (s, 1H), 3.26 (s, 3H), 2.84 (s, 2H), 1.70 (s, 3H);  $^{13}\text{C}$  NMR (100 MHz,  $\text{CDCl}_3$ )  $\delta$  170.4, 142.6, 139.6, 133.5, 129.8, 128.6, 113.7, 42.9, 37.3, 22.6. IR (film)  $\nu_{\text{max}}$ : 3455, 3079, 2922, 1901, 1661, 1491, 1434, 1372, 1307, 1257, 1122, 1092, 1015, 894, 778, 726, 555  $\text{cm}^{-1}$ . ESI-MS:  $m/z = 224$  ( $\text{M}+\text{H}$ ) $^+$ .

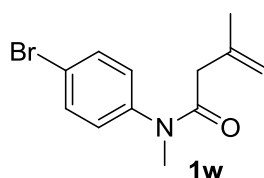

$^1\text{H}$  NMR (400 MHz,  $\text{CDCl}_3$ ):  $\delta$  7.54 (d,  $J = 8.8$  Hz, 2H), 7.10 (d,  $J = 8.4$  Hz, 2H), 4.83 (s, 1H), 4.63 (s, 1H), 3.26 (s, 3H), 2.85 (s, 2H), 1.70 (s, 3H);  $^{13}\text{C}$  NMR (100 MHz,  $\text{CDCl}_3$ )  $\delta$  170.2, 143.0, 139.6, 132.7, 128.9, 121.4, 113.7, 42.8, 37.2, 22.5. IR (film)  $\nu_{\text{max}}$ : 3457, 2926, 2088, 1656, 1486, 1435, 1372, 1308, 1258, 1121, 1072, 1012, 894, 836, 721, 553  $\text{cm}^{-1}$ . ESI-MS:  $m/z = 268$  ( $\text{M}+\text{H}$ ) $^+$ .

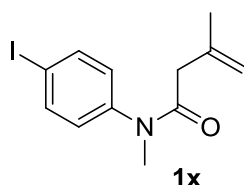

$^1\text{H}$  NMR (400 MHz,  $\text{CDCl}_3$ ):  $\delta$  7.74 (d,  $J = 8.4$  Hz, 2H), 6.97 (d,  $J = 8.8$  Hz, 2H), 4.83 (s, 1H), 4.63 (s, 1H), 3.26 (s, 3H), 2.85 (s, 2H), 1.70 (s, 3H);  $^{13}\text{C}$  NMR (100 MHz,  $\text{CDCl}_3$ )  $\delta$  170.3, 143.8, 139.7, 138.8, 129.2, 113.8, 92.8, 42.9, 37.3, 22.6. IR (film)  $\nu_{\text{max}}$ : 3433, 2922, 1658, 1483, 1373, 1256, 1121, 1008, 893, 832, 719, 553  $\text{cm}^{-1}$ . ESI-MS:  $m/z = 316$  ( $\text{M}+\text{H}$ ) $^+$ .

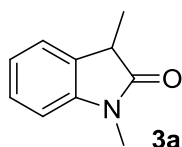

$^1\text{H}$  NMR (400 MHz,  $\text{CDCl}_3$ ):  $\delta$  7.28-7.21 (m, 2H), 7.06-7.02 (m, 1H), 6.81 (d,  $J = 8.0$  Hz, 1H), 3.41 (q,  $J = 7.6$  Hz, 1H), 3.19 (s, 3H), 1.47 (d,  $J = 7.6$  Hz, 3H);  $^{13}\text{C}$  NMR (100 MHz,  $\text{CDCl}_3$ )  $\delta$  178.4, 143.8, 130.5, 127.7, 123.3, 122.2, 107.8, 40.3, 26.0, 15.2. ESI-MS:  $m/z = 162$  ( $\text{M}+\text{H}$ ) $^+$ .

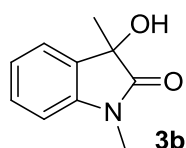

$^1\text{H}$  NMR (400 MHz,  $\text{CDCl}_3$ ):  $\delta$  7.40 (d,  $J = 7.2$  Hz, 1H), 7.33-7.29 (m, 1H), 7.10 (t,  $J = 7.6$  Hz, 1H), 6.83 (d,  $J = 7.6$  Hz, 1H), 3.87 (s, 1H), 3.18 (s, 3H), 1.60 (s, 3H);  $^{13}\text{C}$  NMR (100 MHz,  $\text{CDCl}_3$ )  $\delta$  178.8, 142.7, 131.6, 129.4, 123.4, 123.2, 108.4, 73.6, 26.2, 24.7. ESI-MS:  $m/z = 178$  ( $\text{M}+\text{H}$ ) $^+$ .

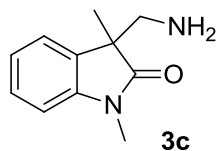

$^1\text{H}$  NMR (400 MHz,  $\text{CDCl}_3$ ):  $\delta$  7.31-7.27 (m, 1H), 7.20 (d,  $J = 7.2$  Hz, 1H), 7.08 (t,  $J = 7.2$  Hz, 1H), 6.87 (d,  $J = 7.6$  Hz, 1H), 3.23 (s, 3H), 3.10 (d,  $J = 12.8$  Hz, 1H), 2.96 (d,  $J = 13.2$  Hz, 1H), 1.37 (s, 2H), 1.34 (s, 3H);  $^{13}\text{C}$  NMR (100 MHz,  $\text{CDCl}_3$ )  $\delta$  179.5, 143.4, 132.1, 127.7, 122.2, 122.1, 107.1, 50.3, 49.0, 25.7, 19.8. ESI-MS:  $m/z = 191$  ( $\text{M}+\text{H}$ ) $^+$ .

9. Charts of new compounds

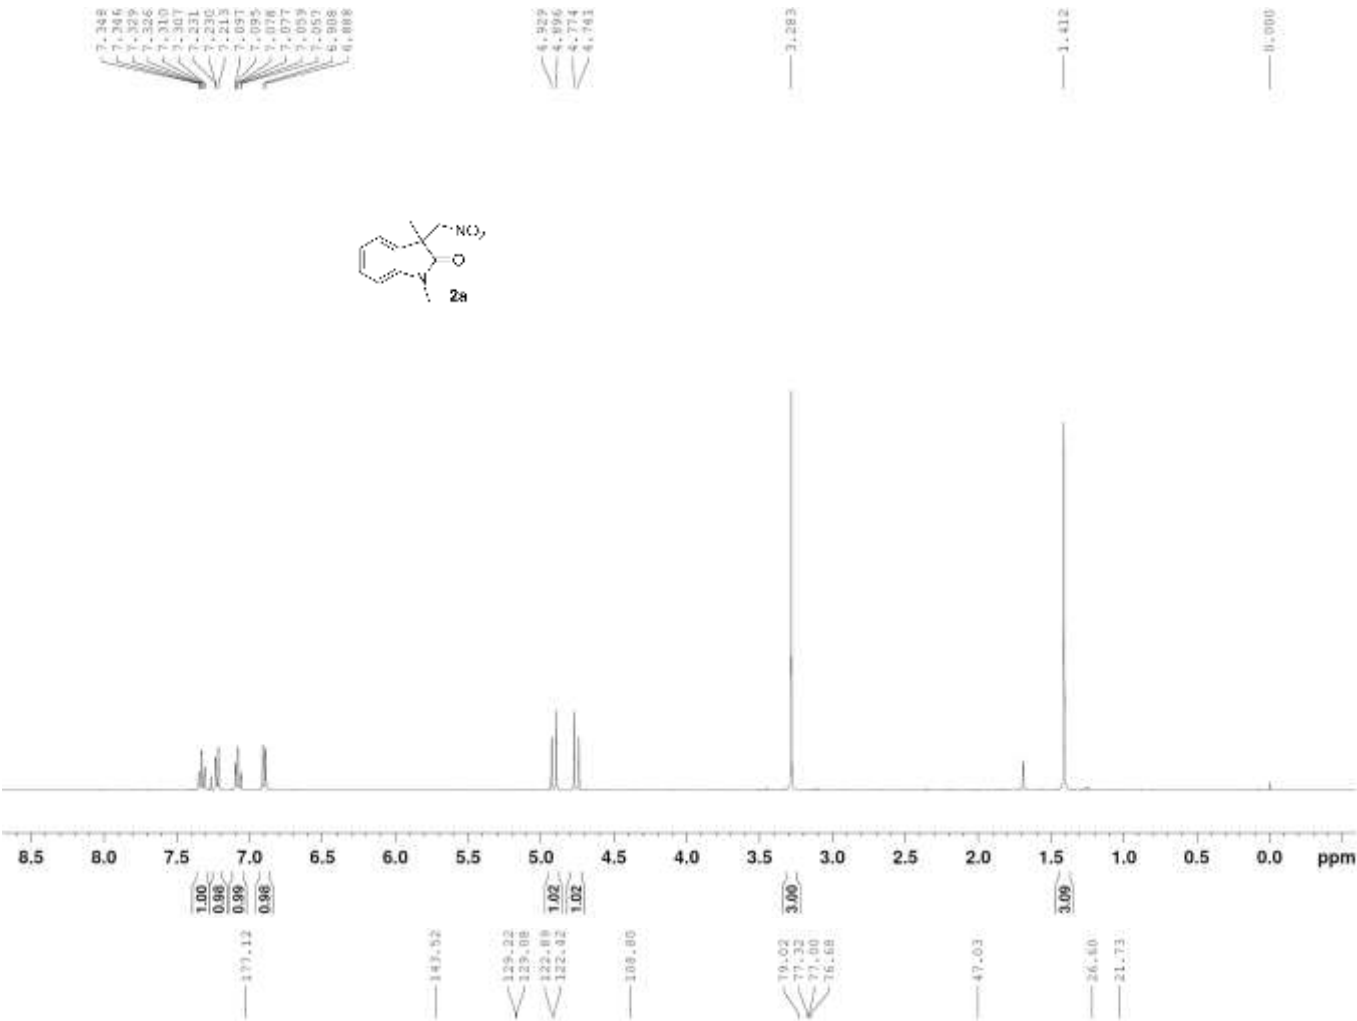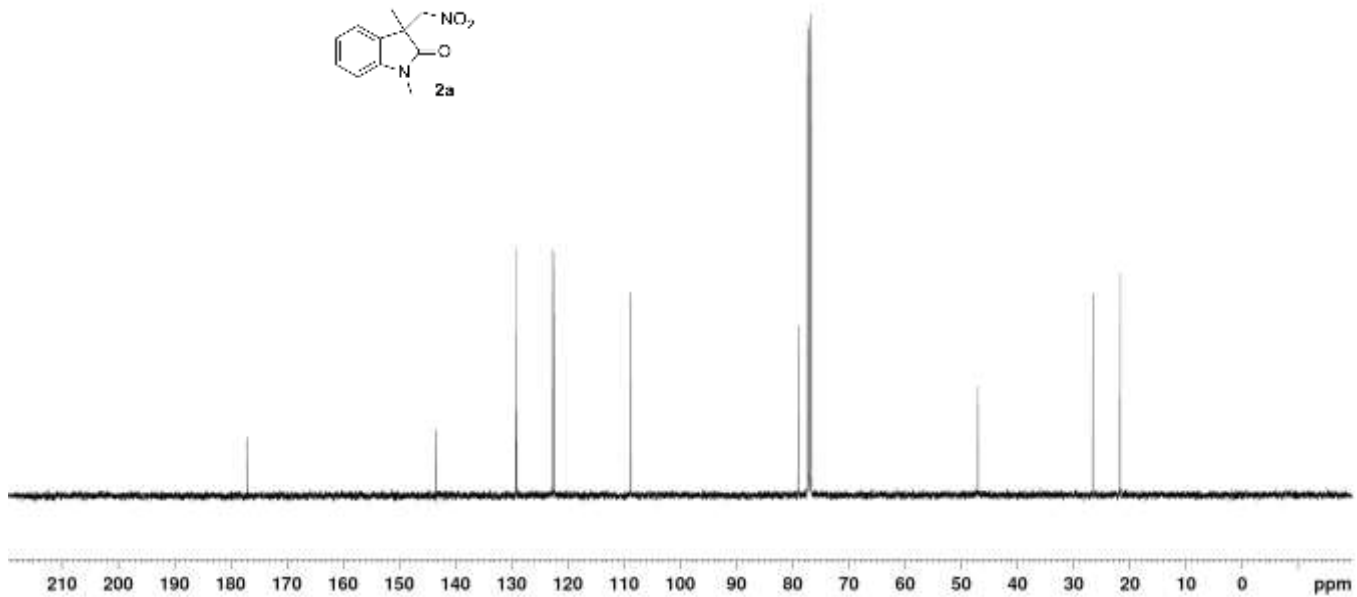

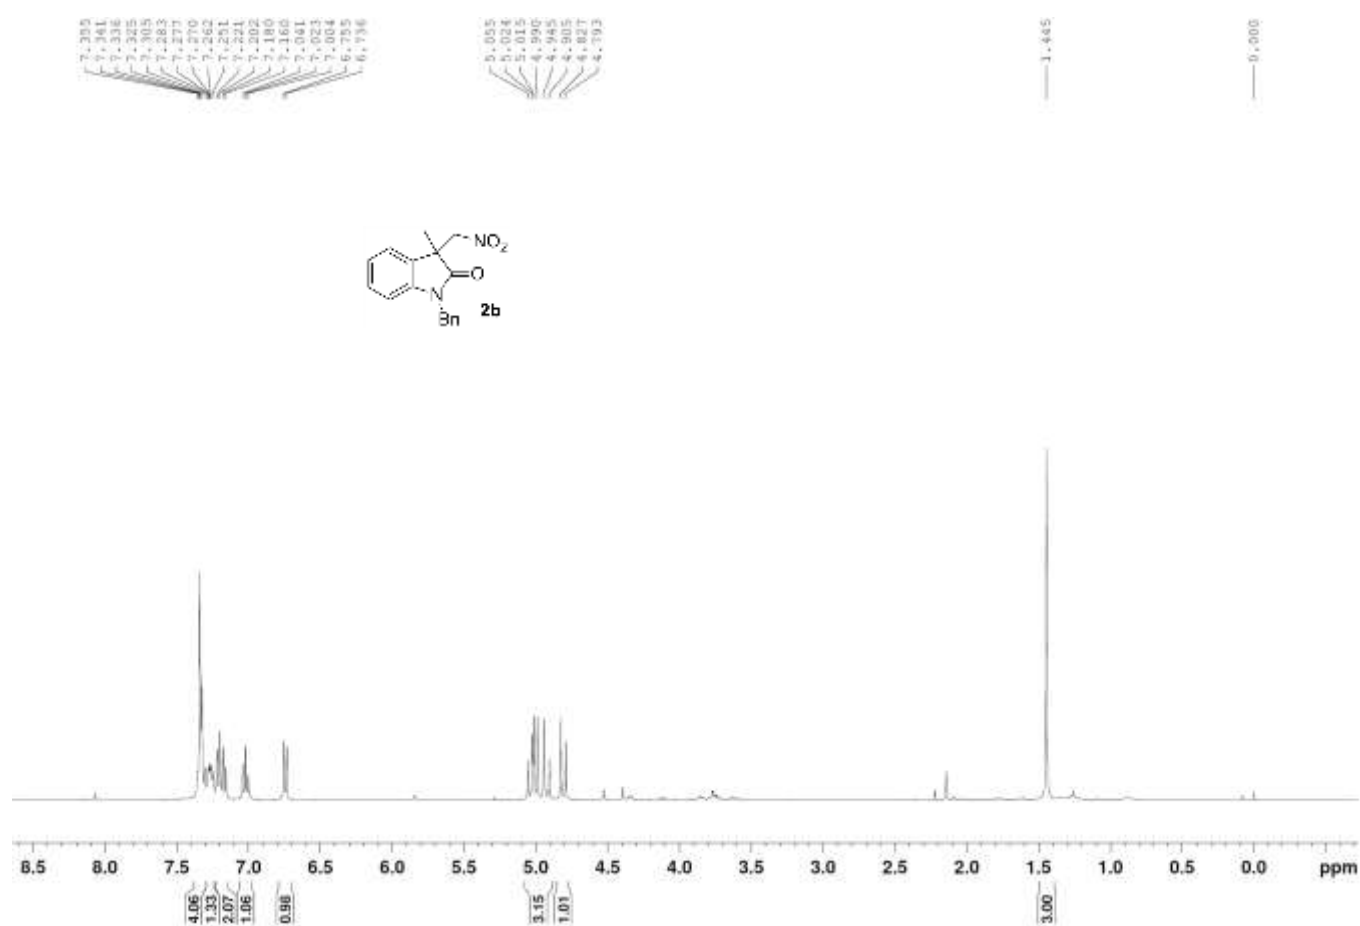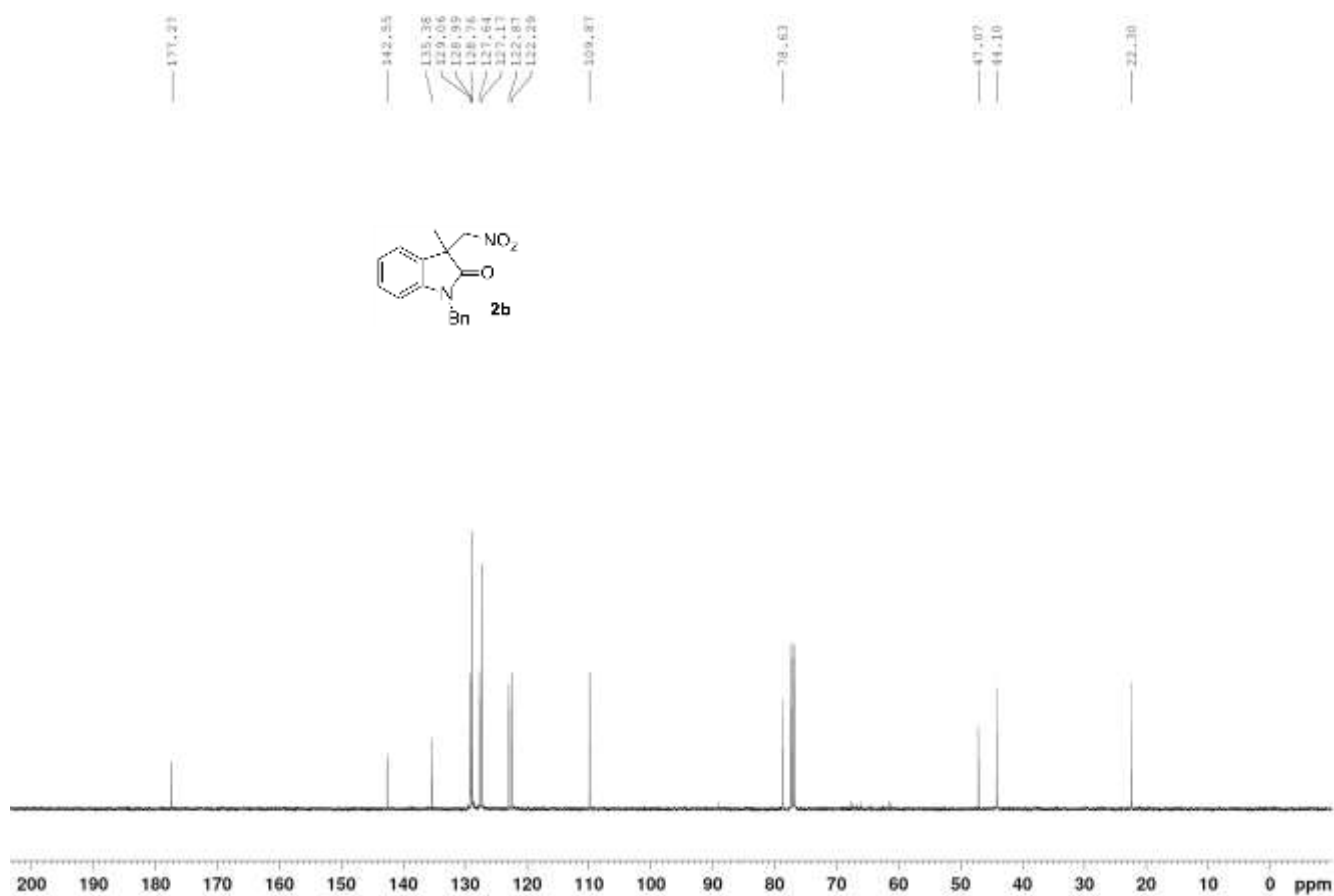

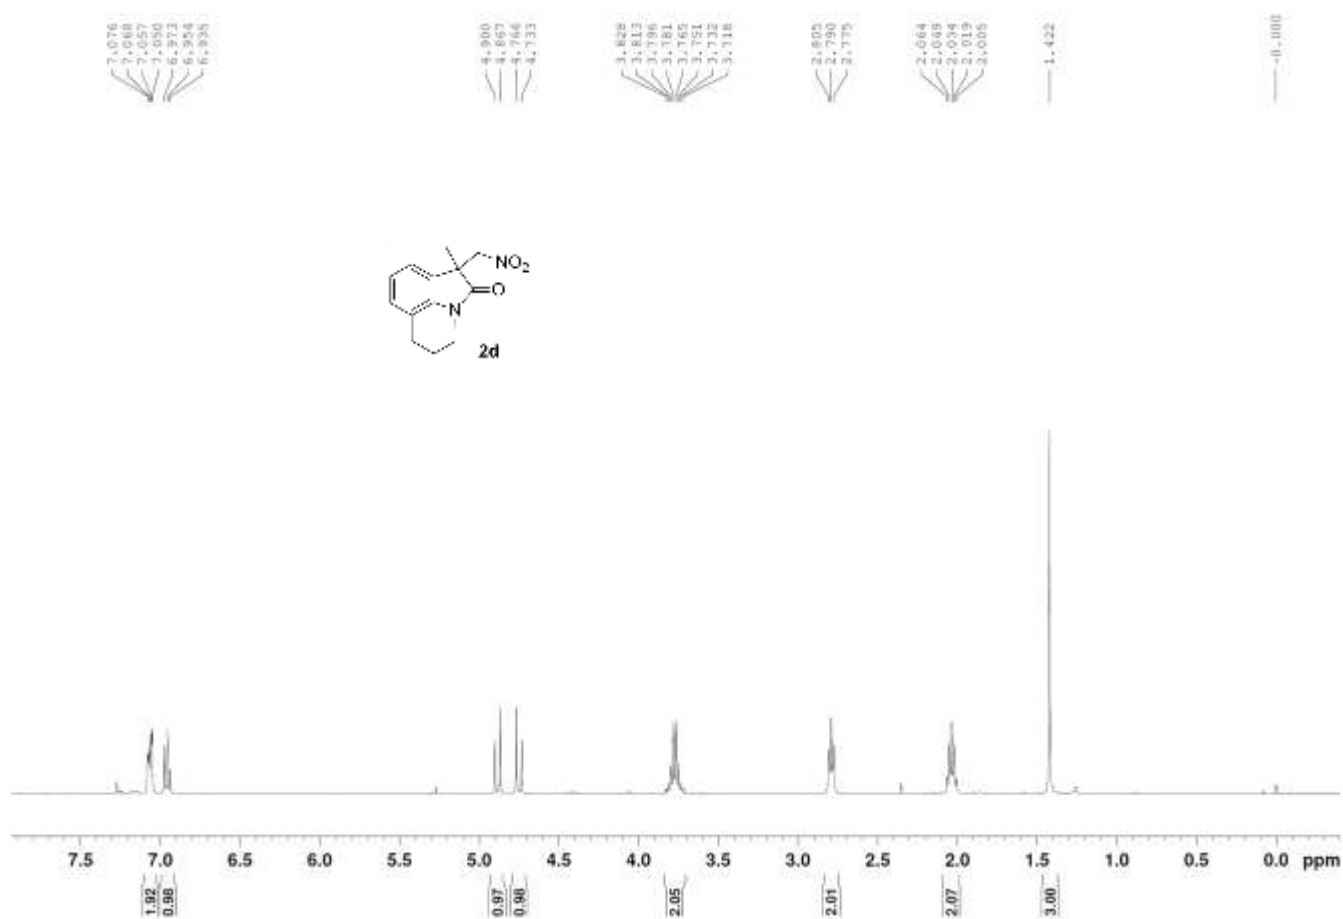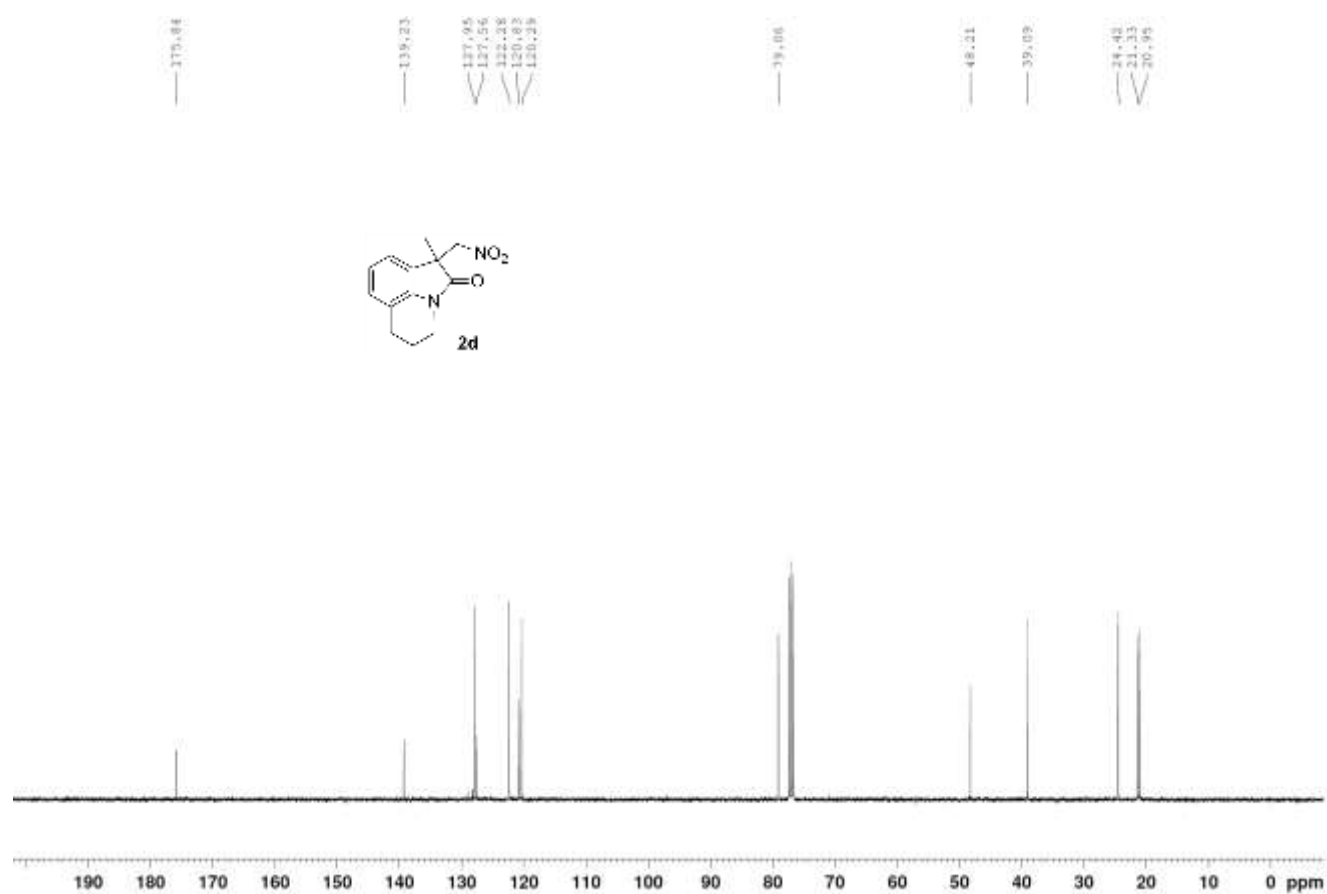

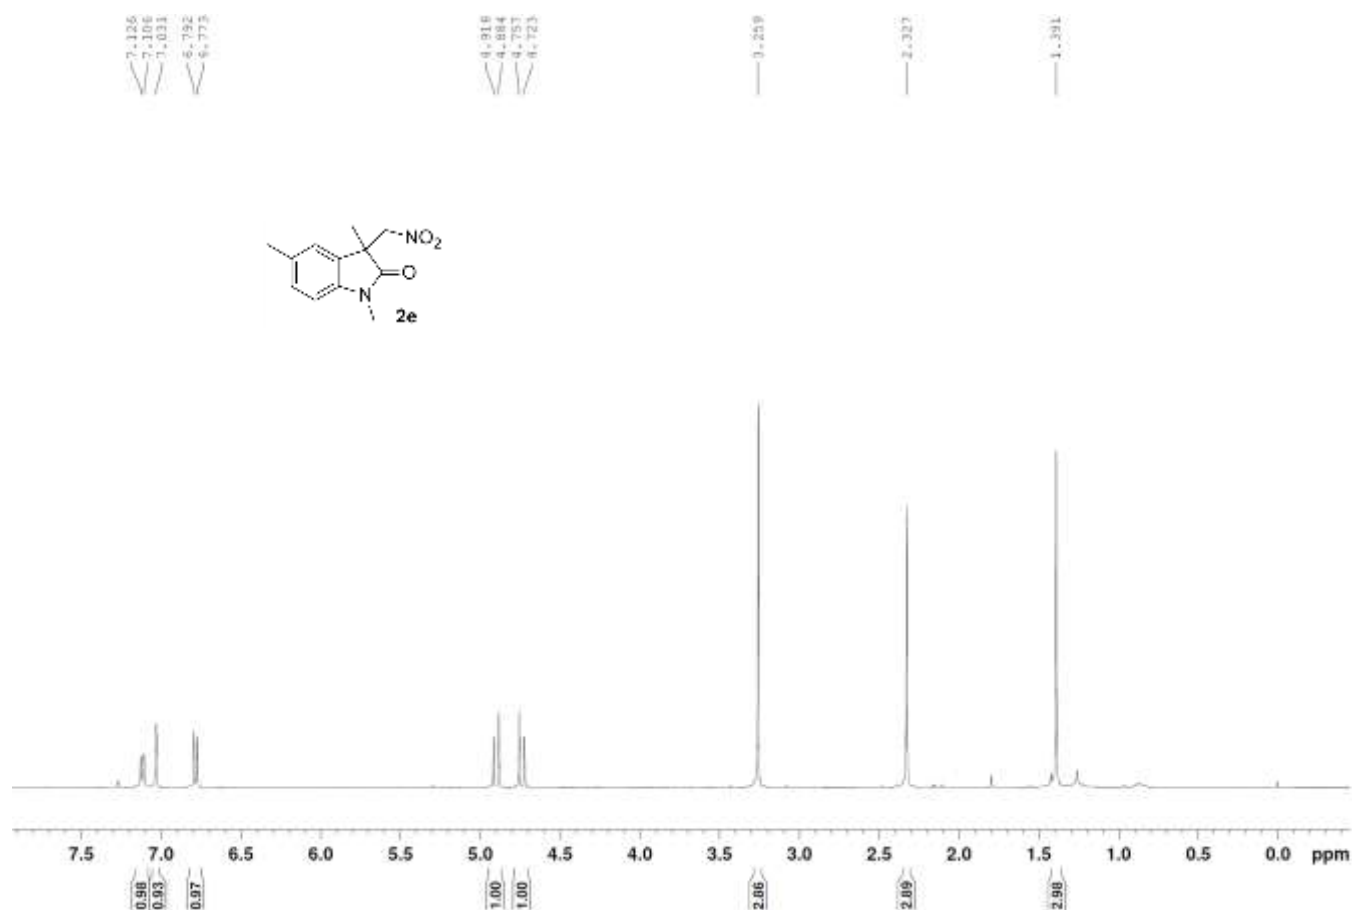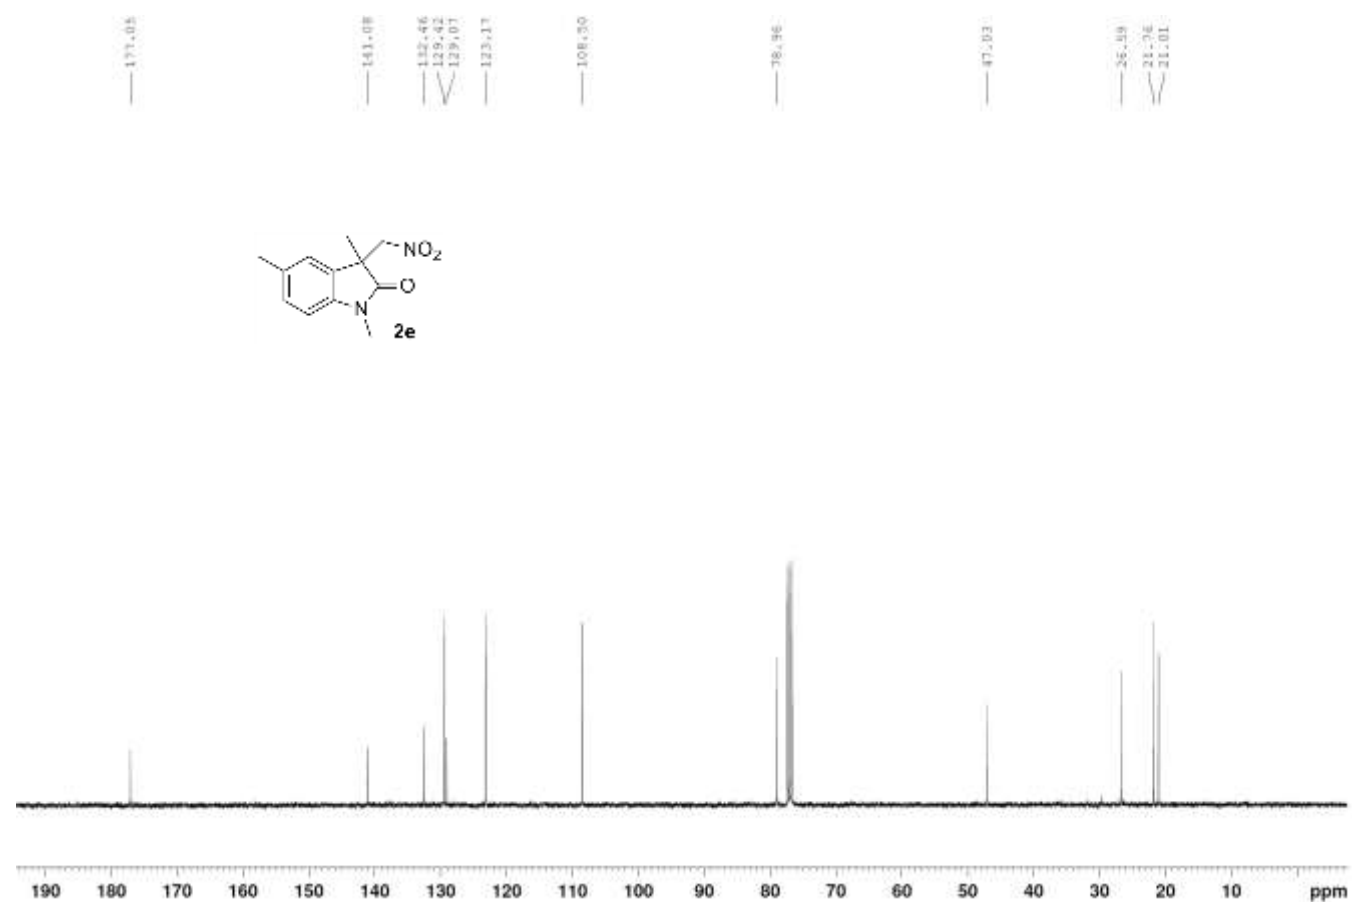

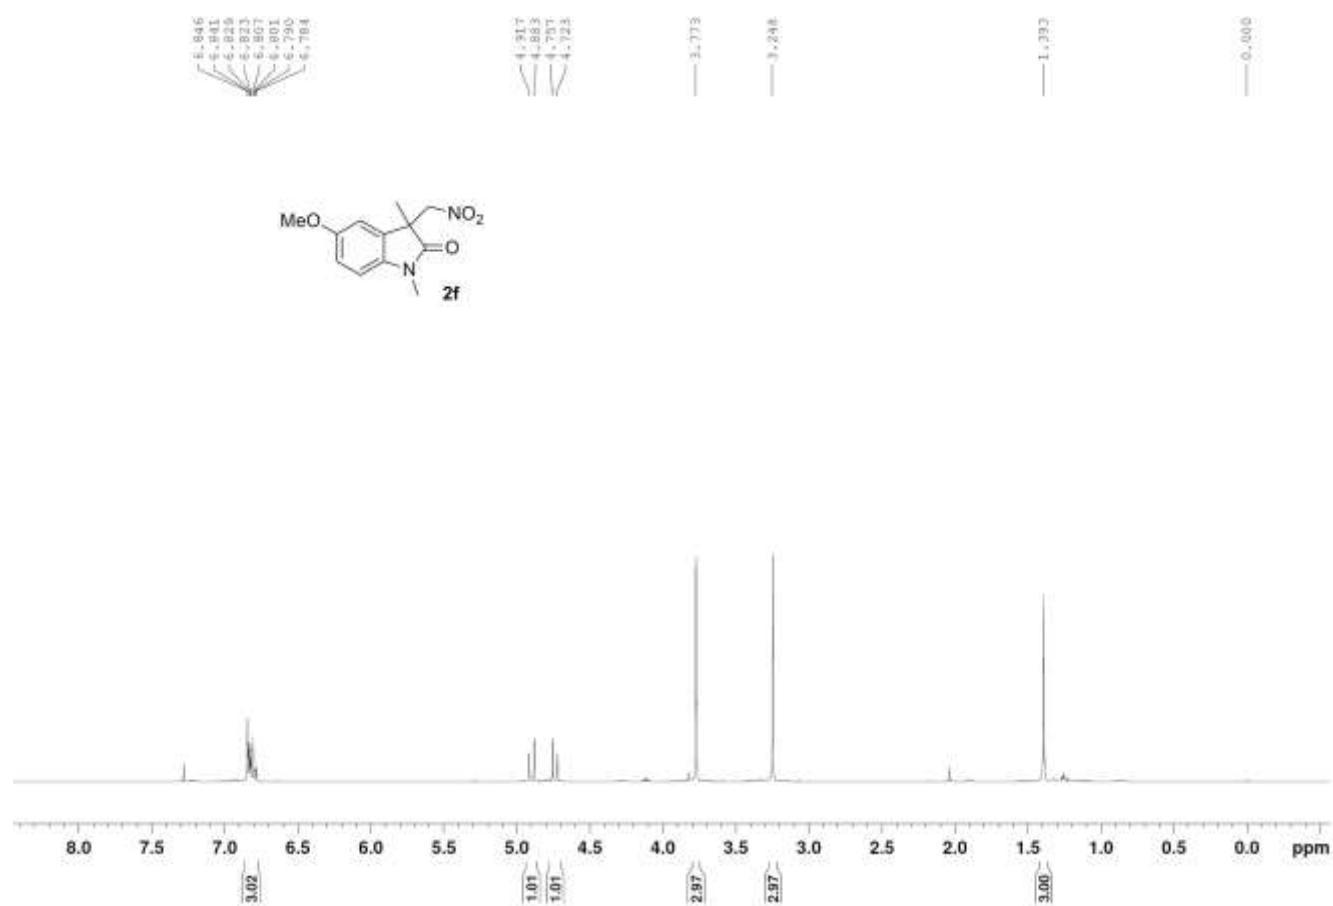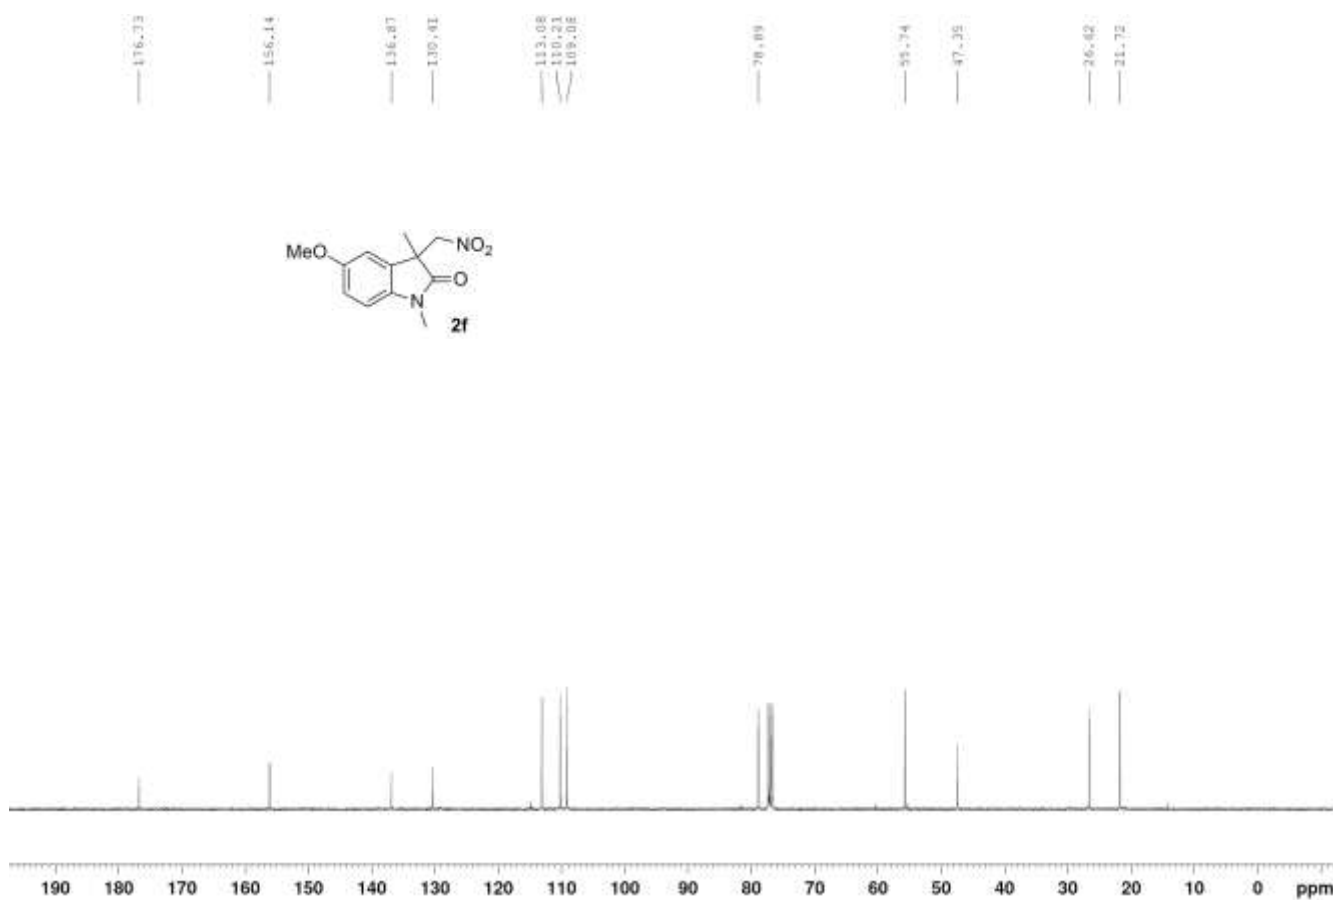

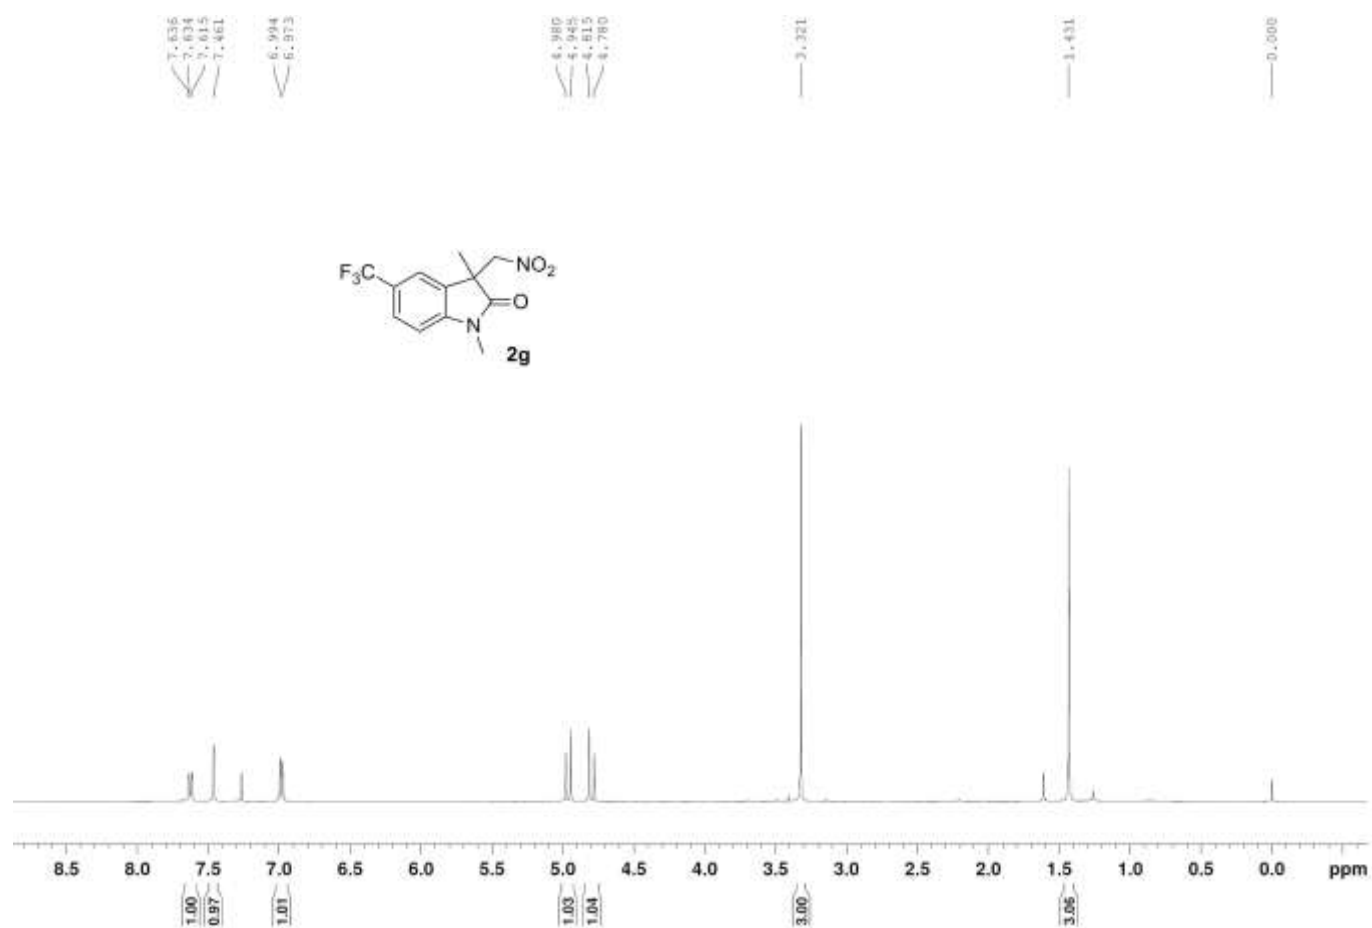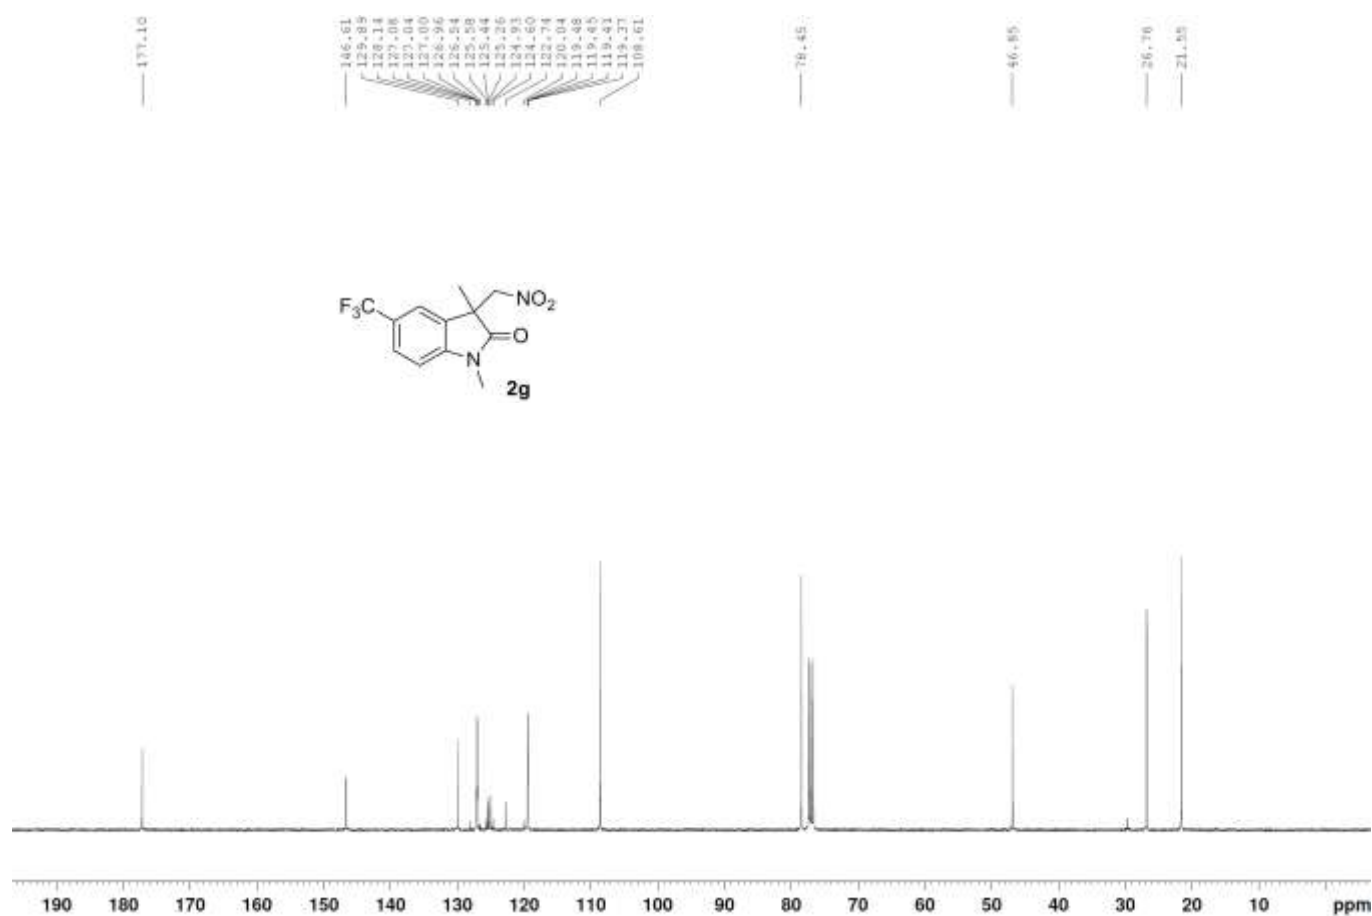

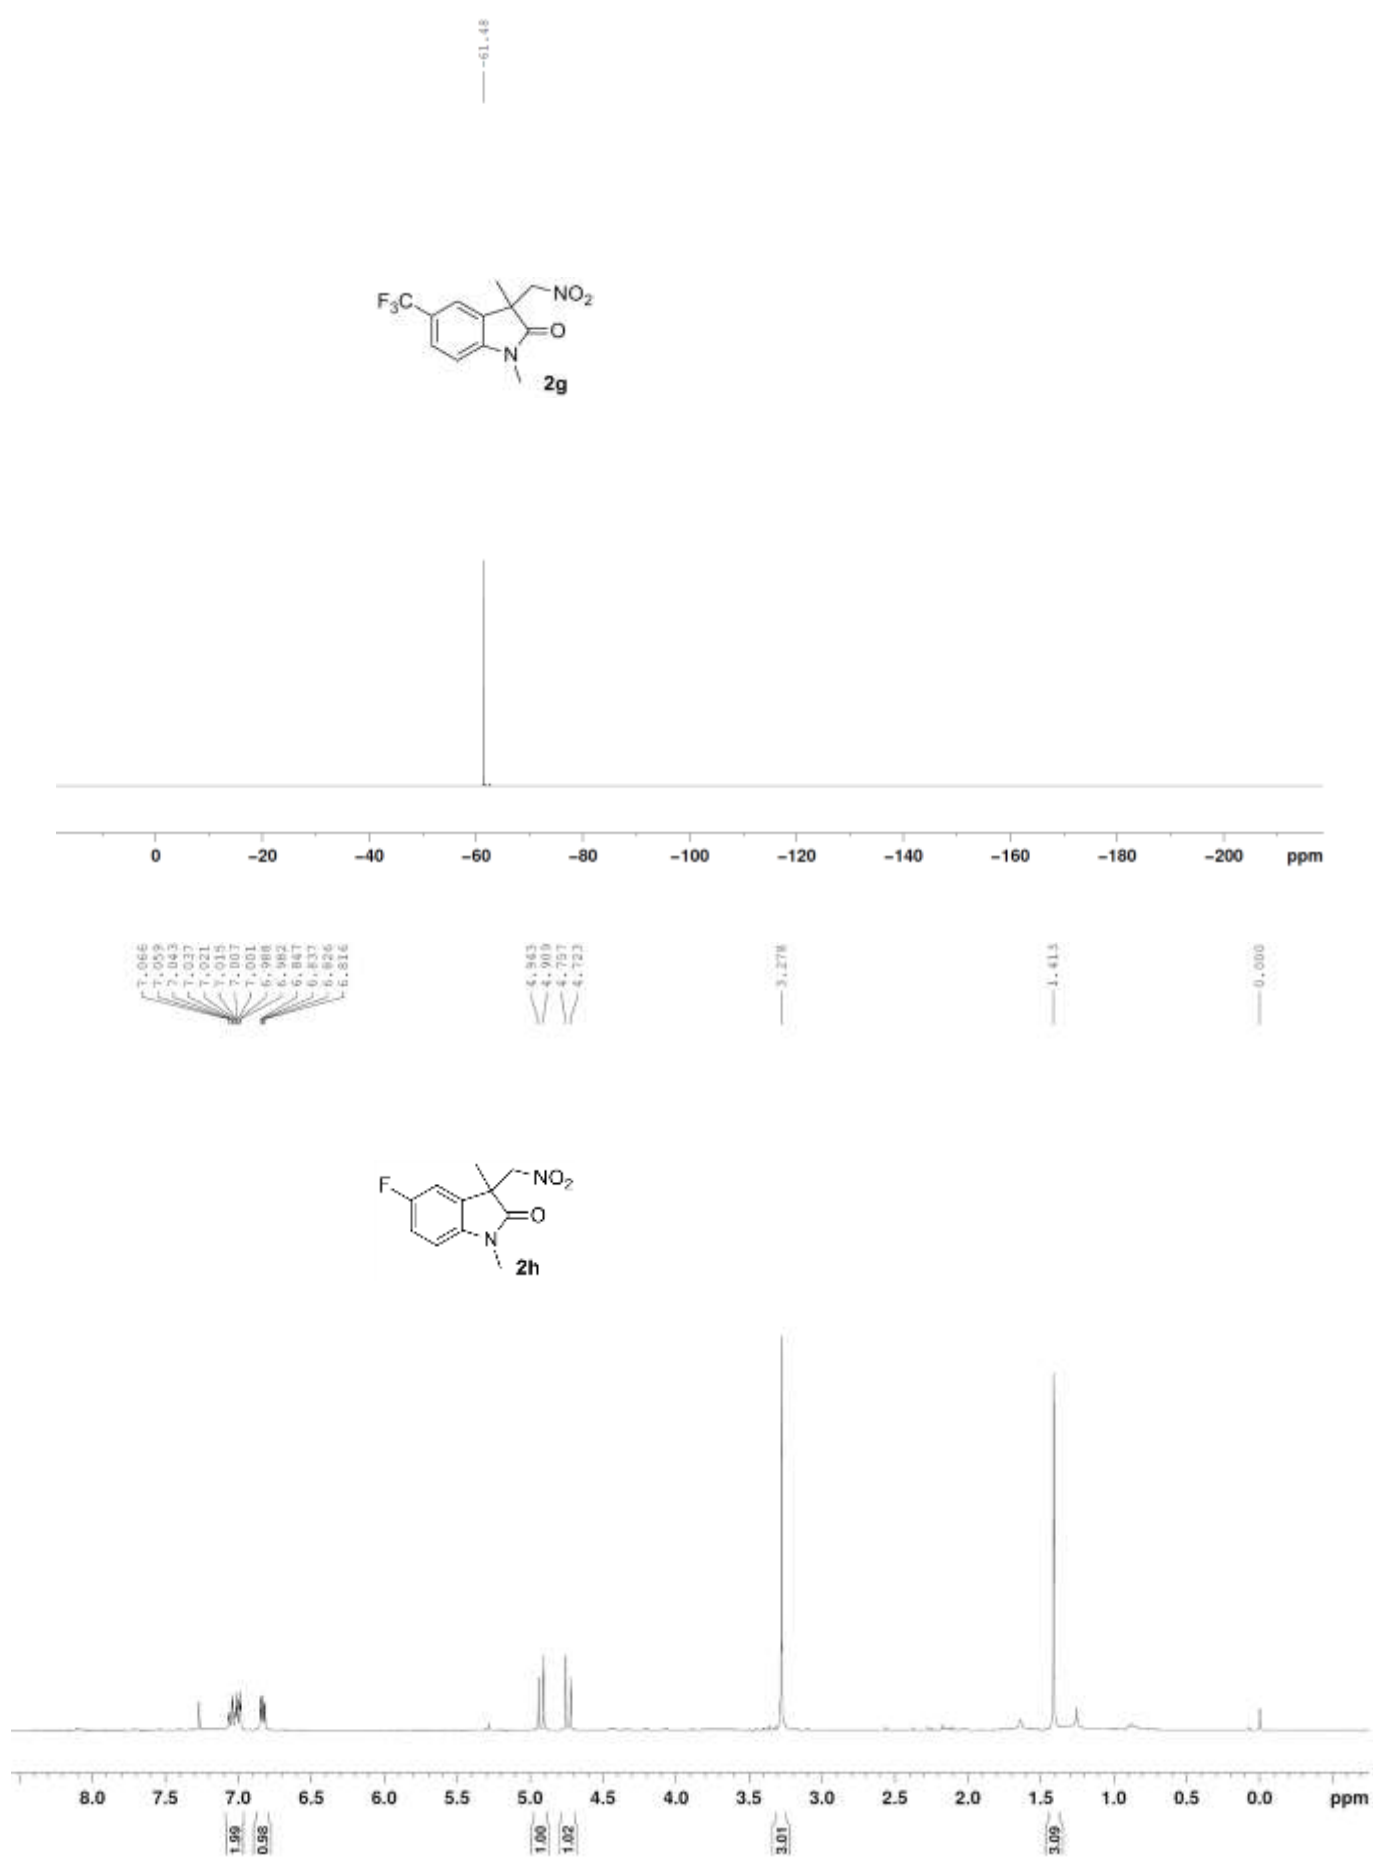

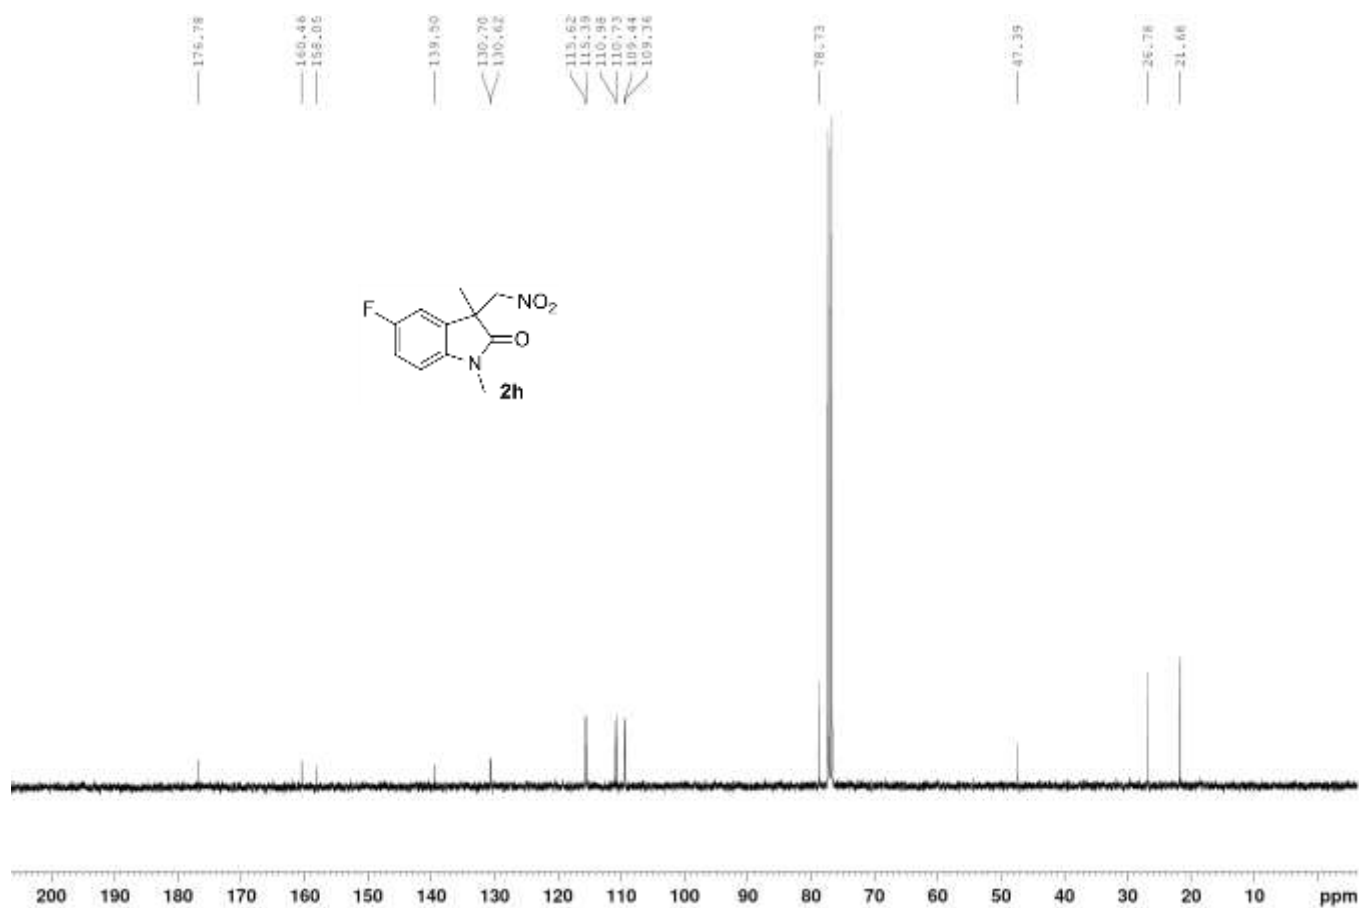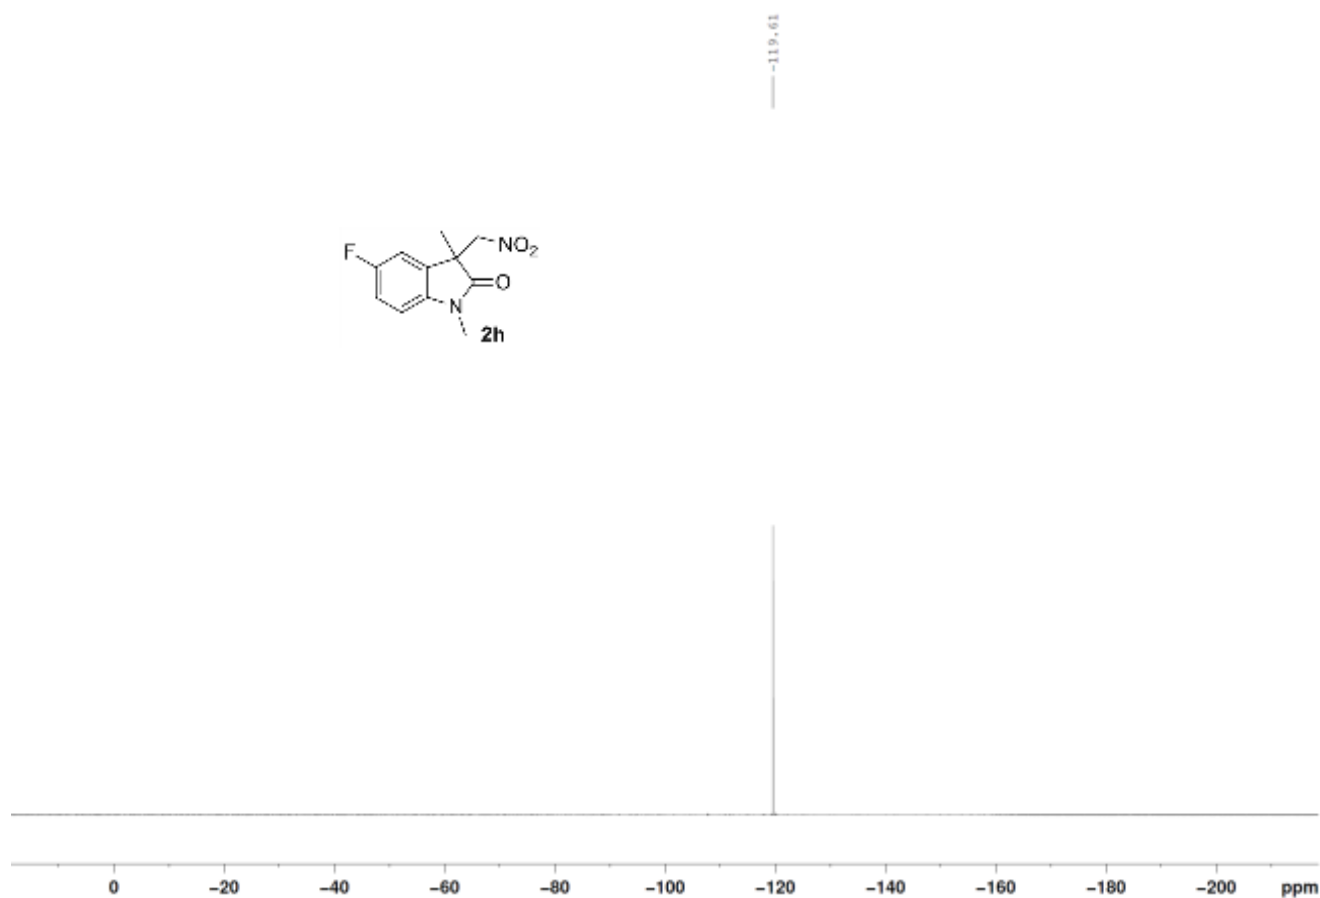

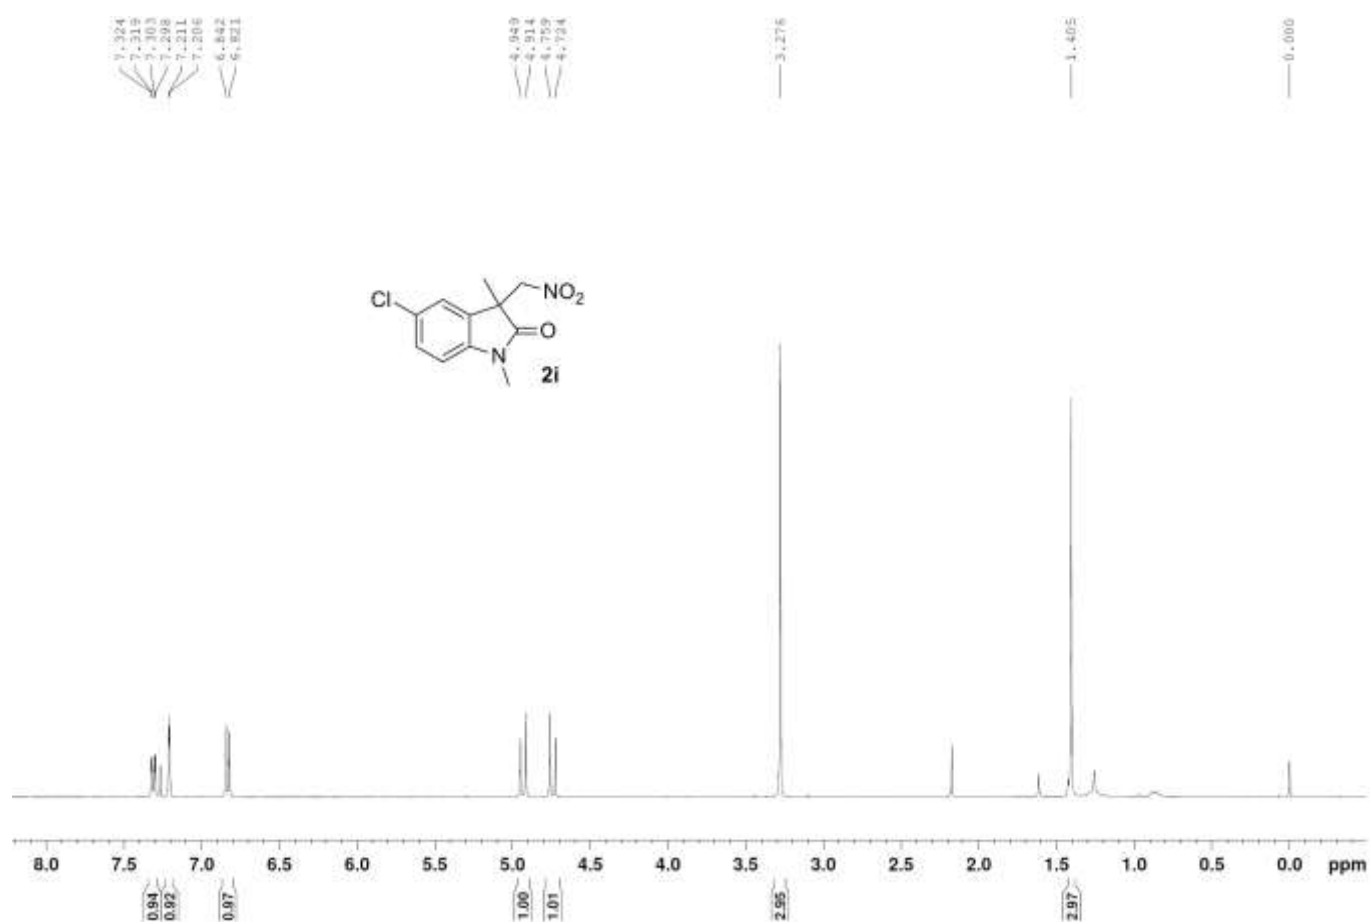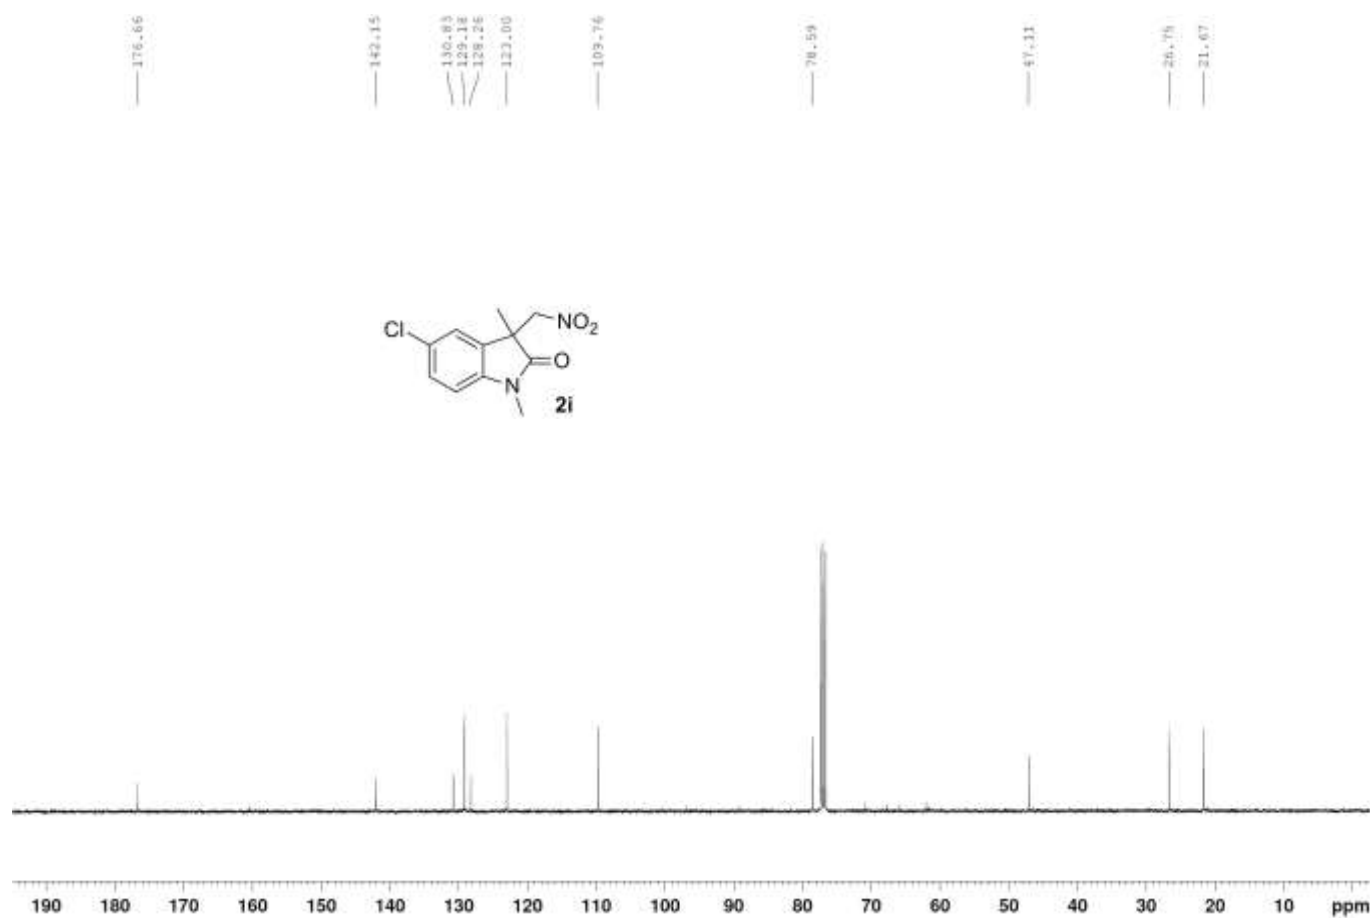

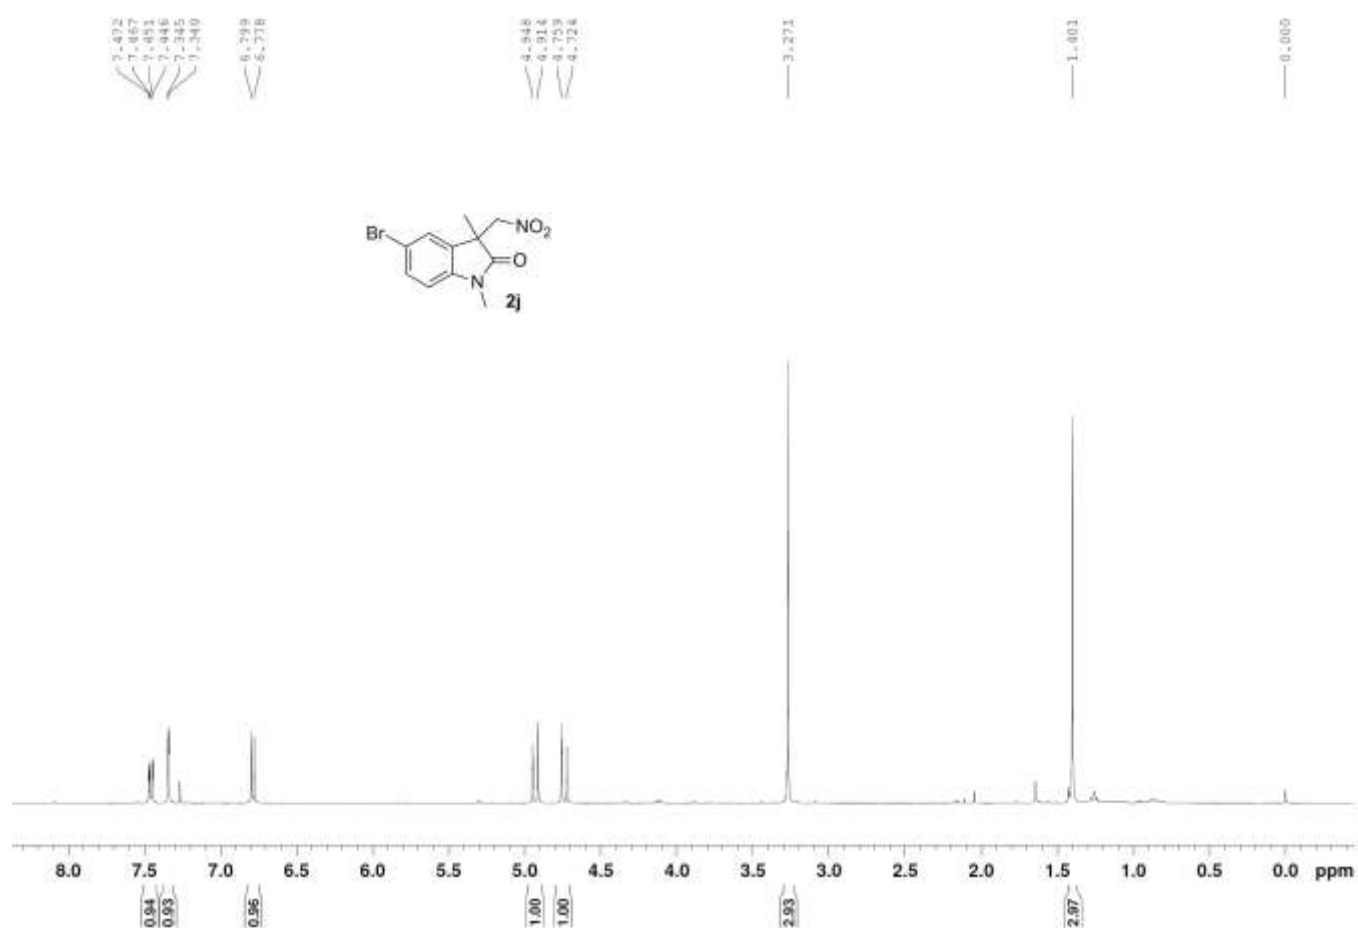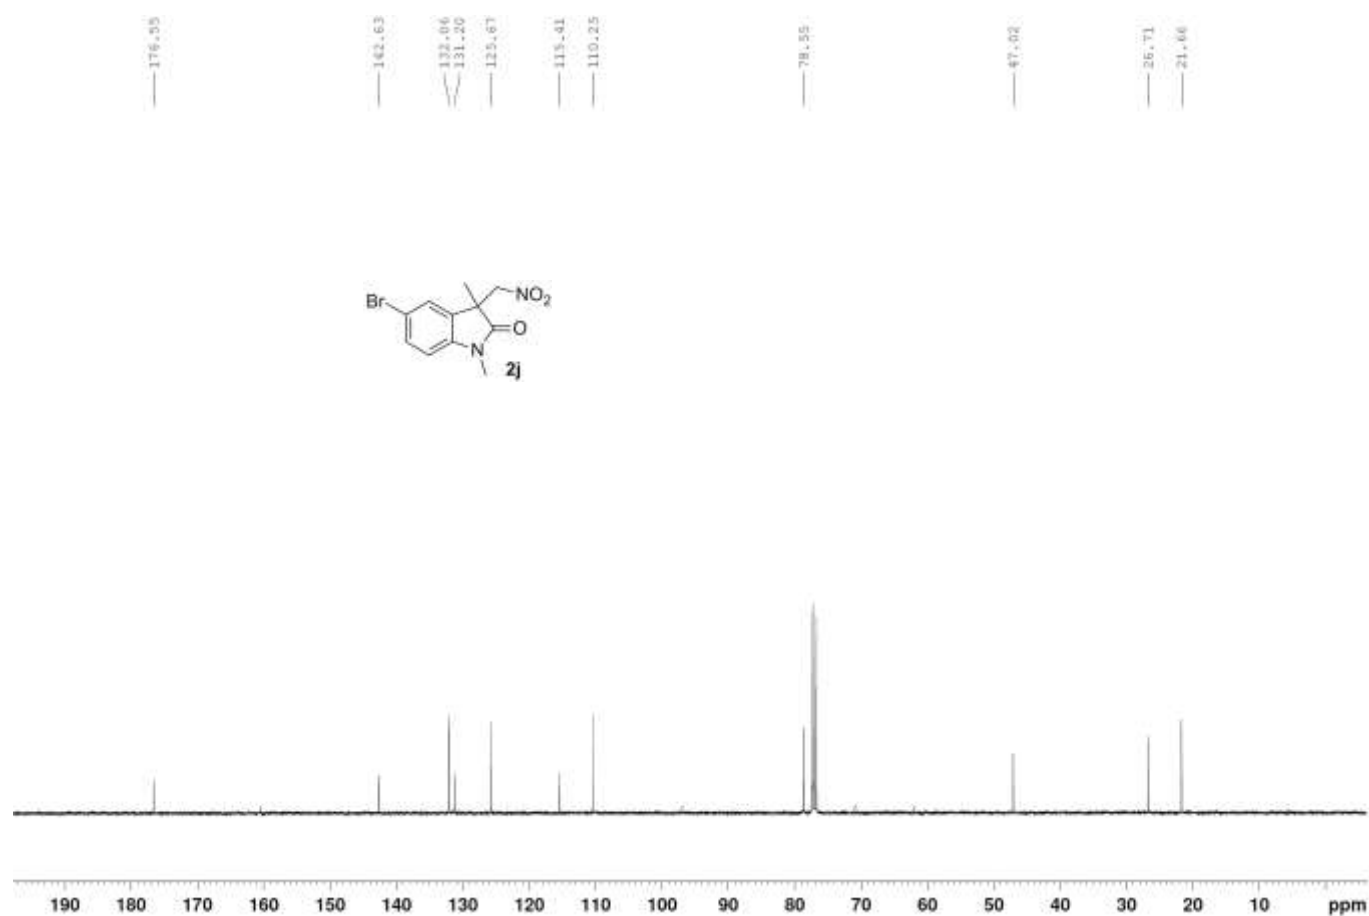

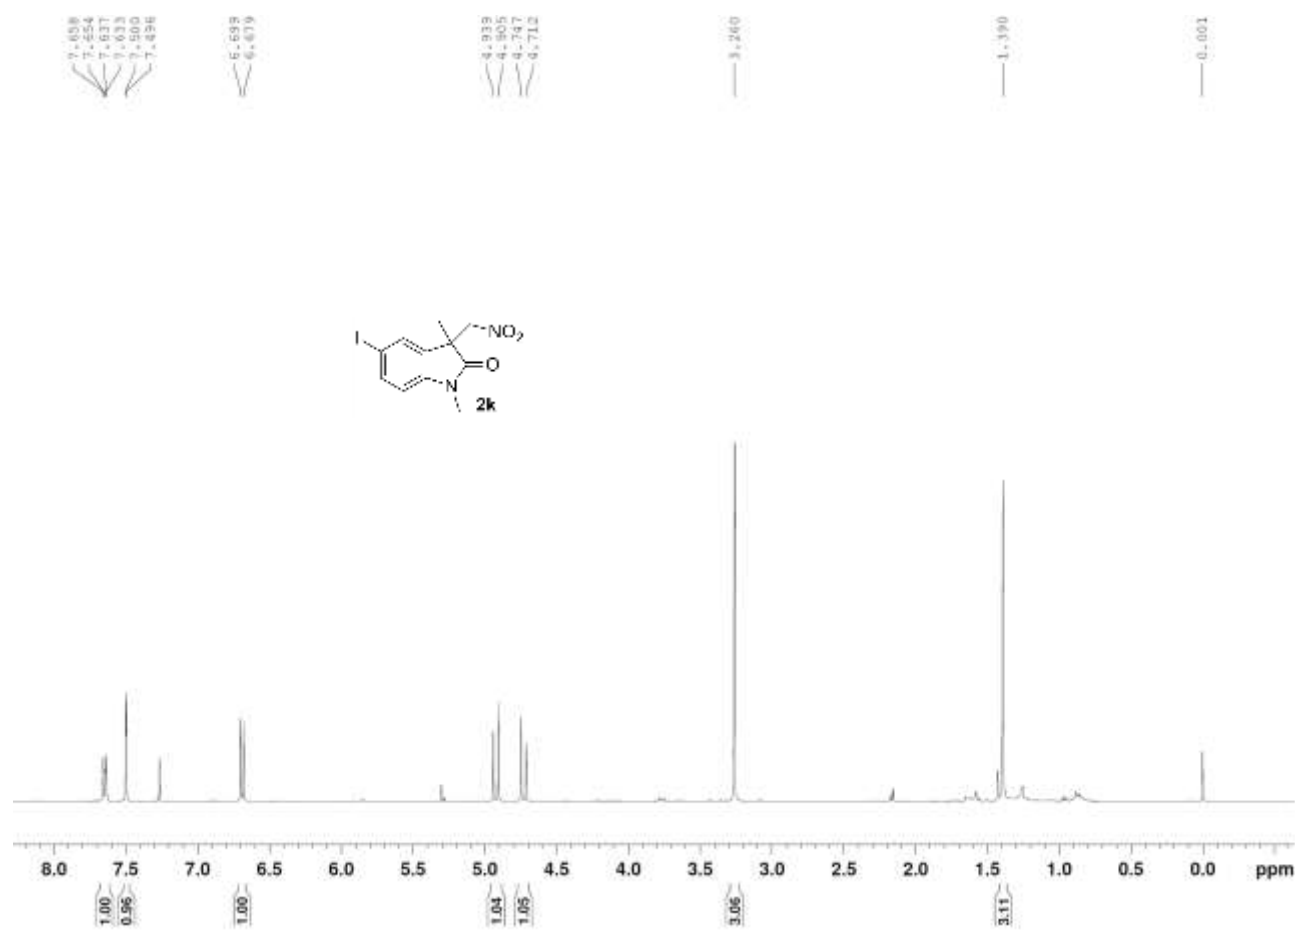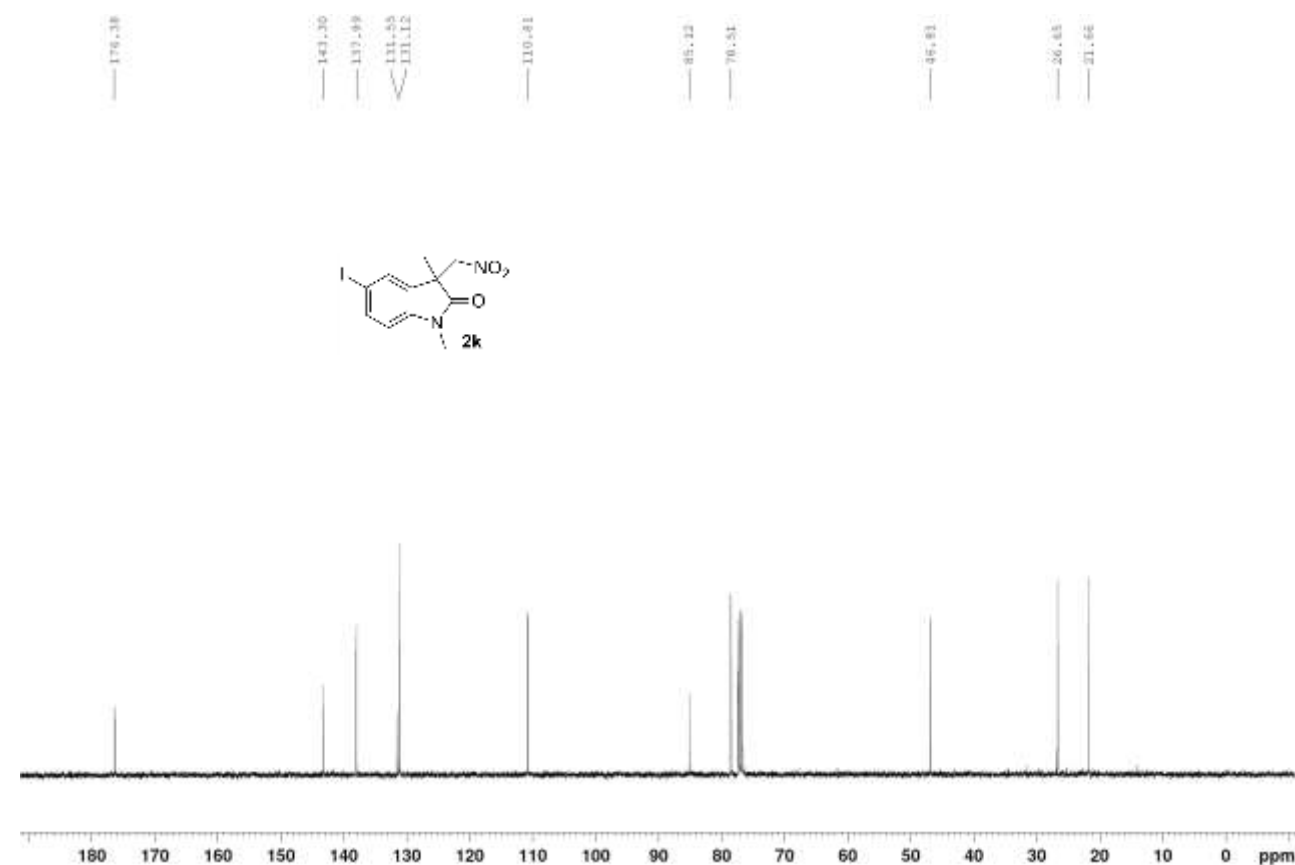

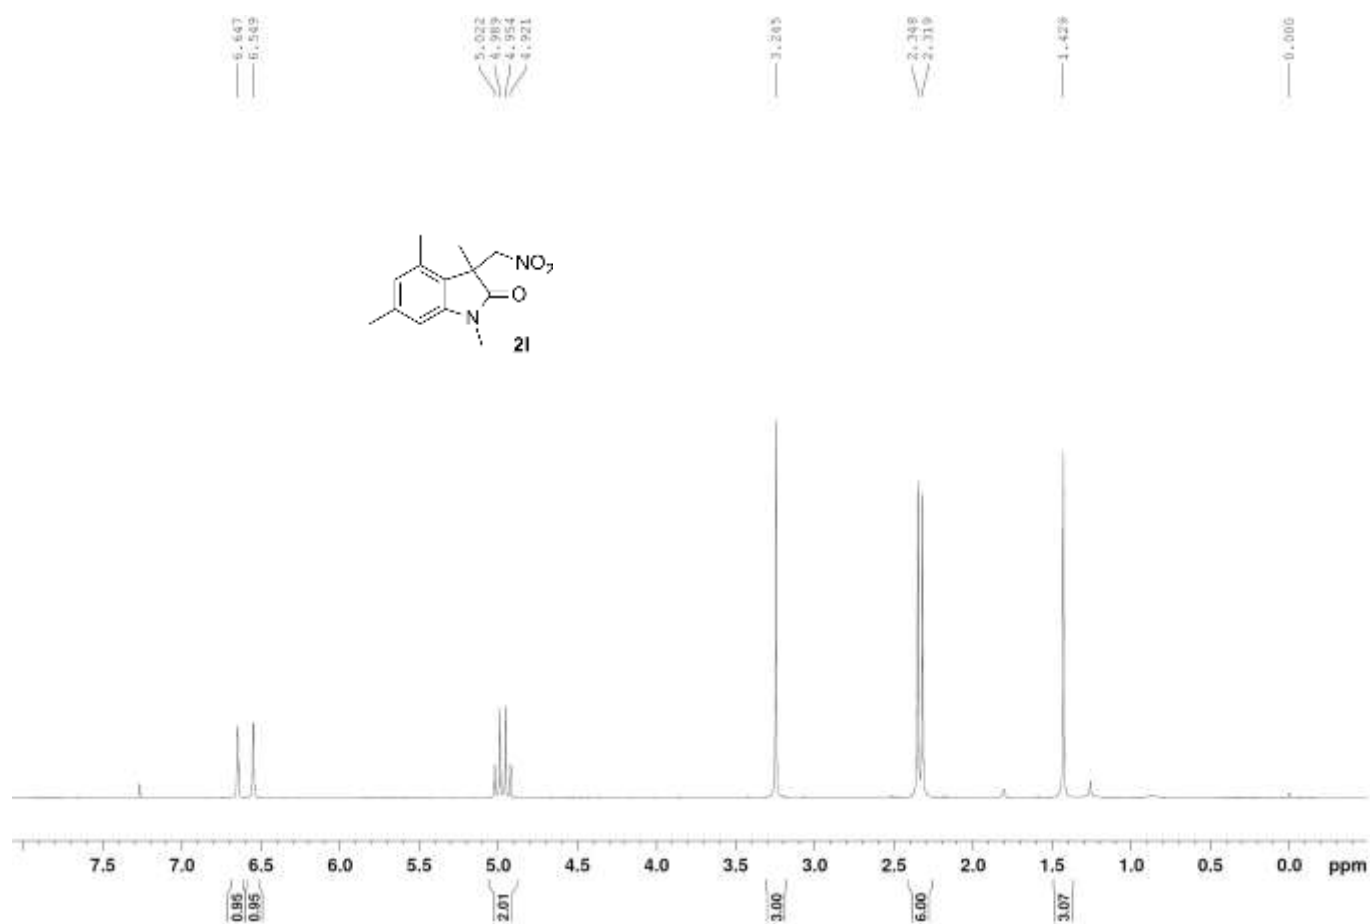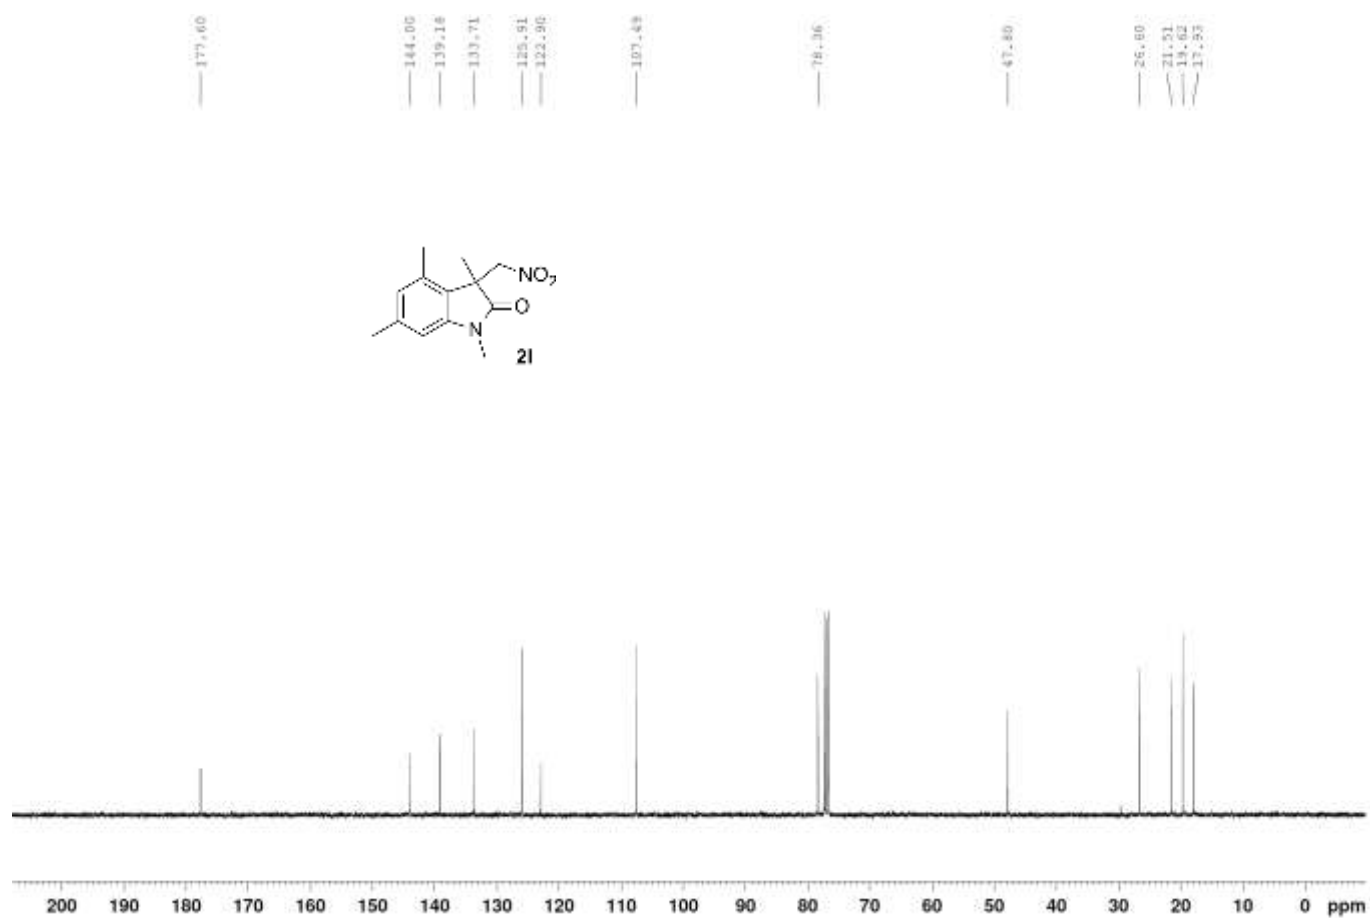

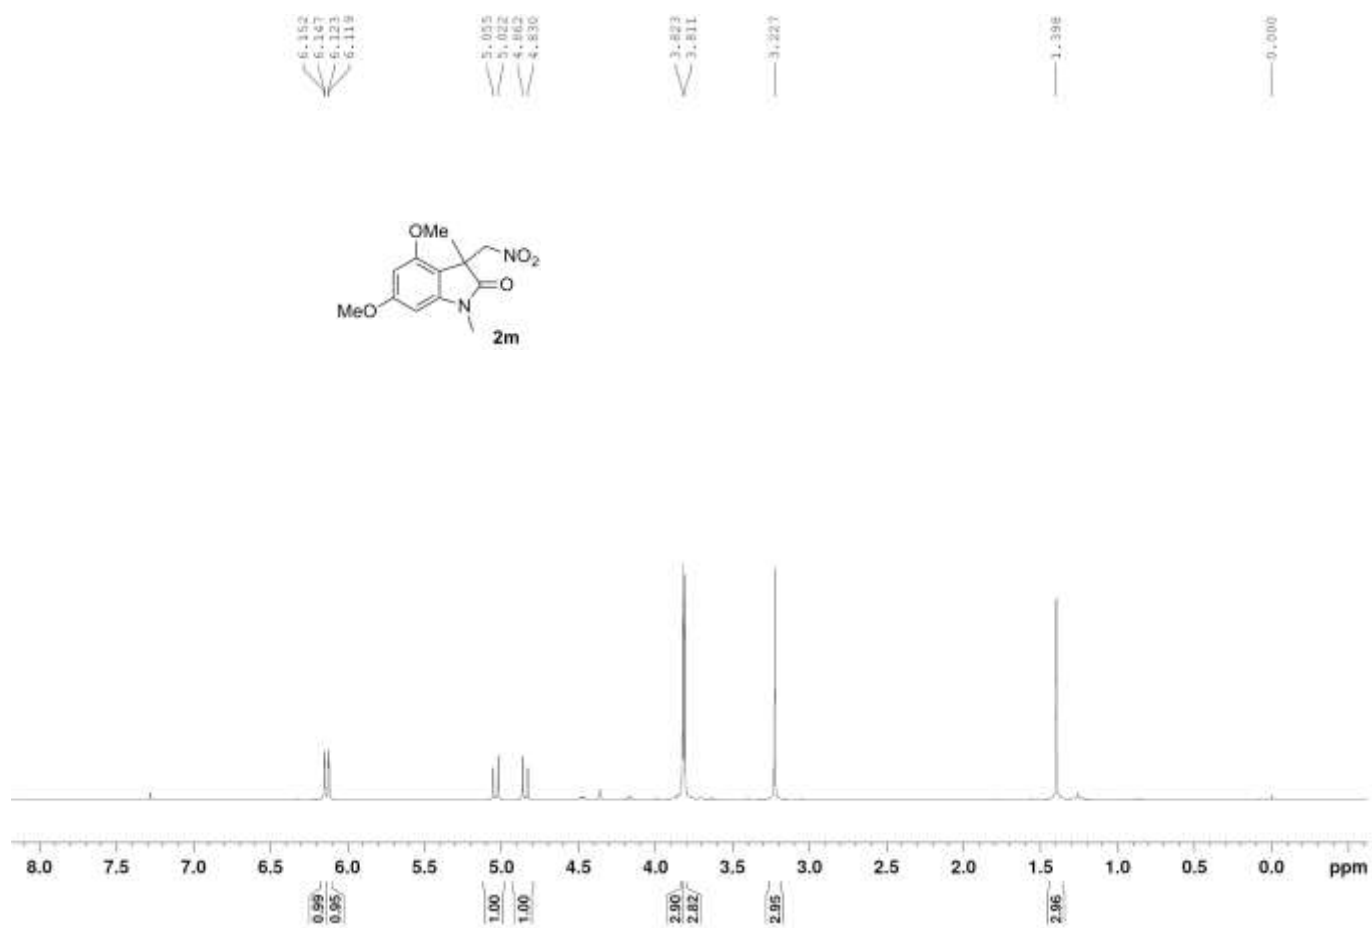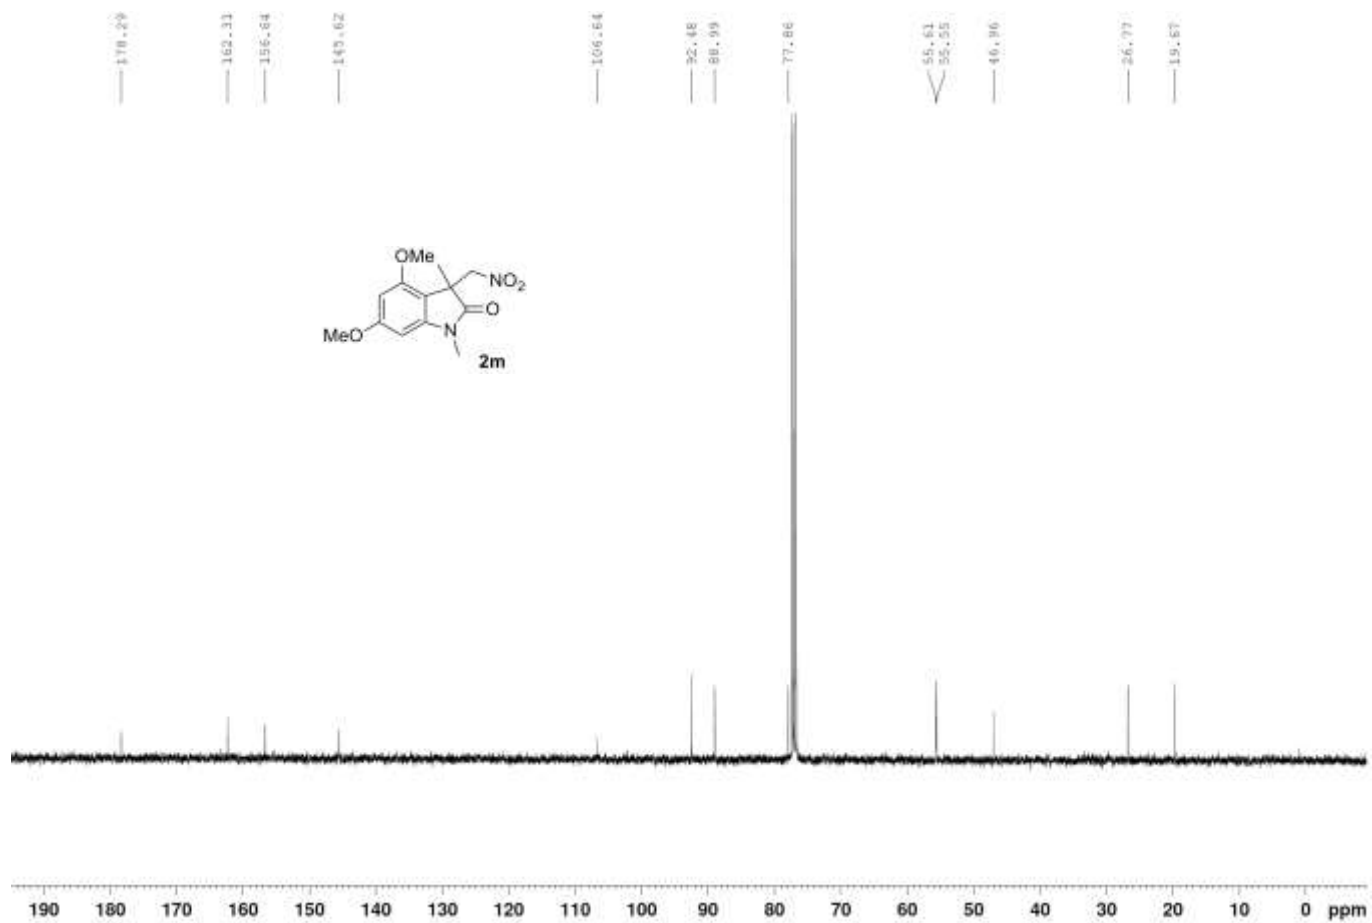

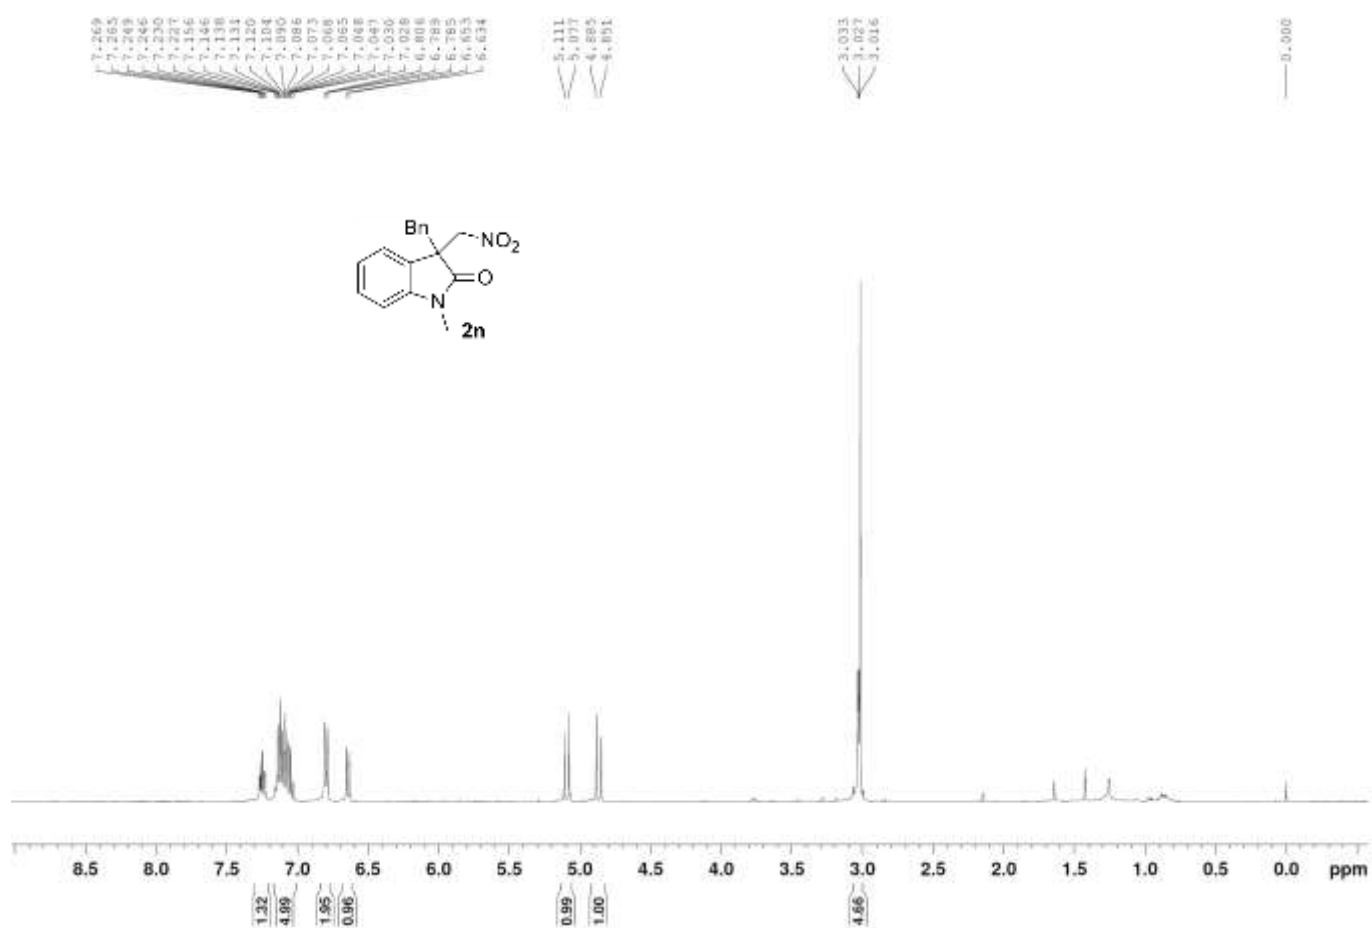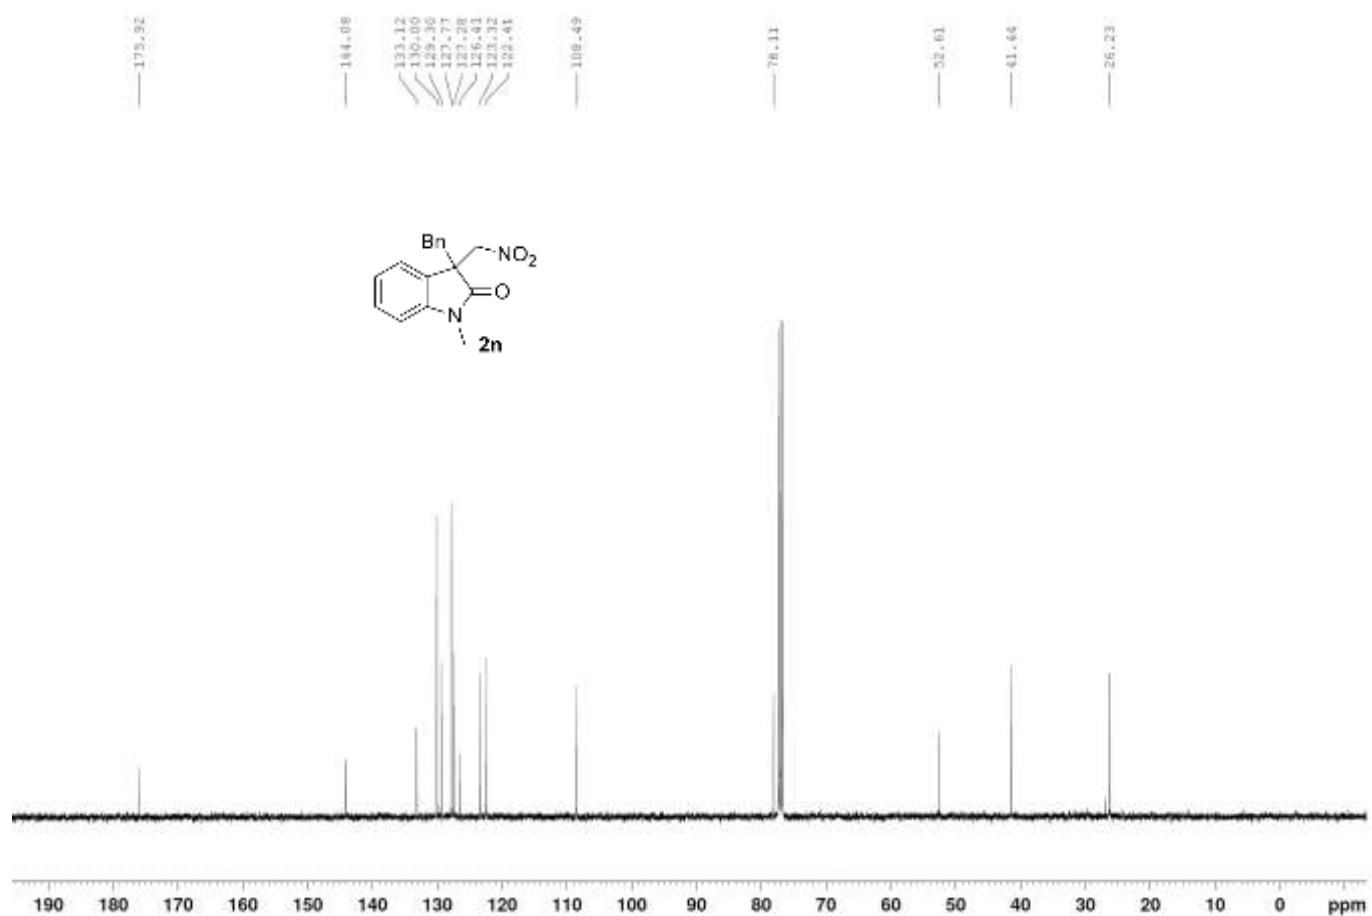

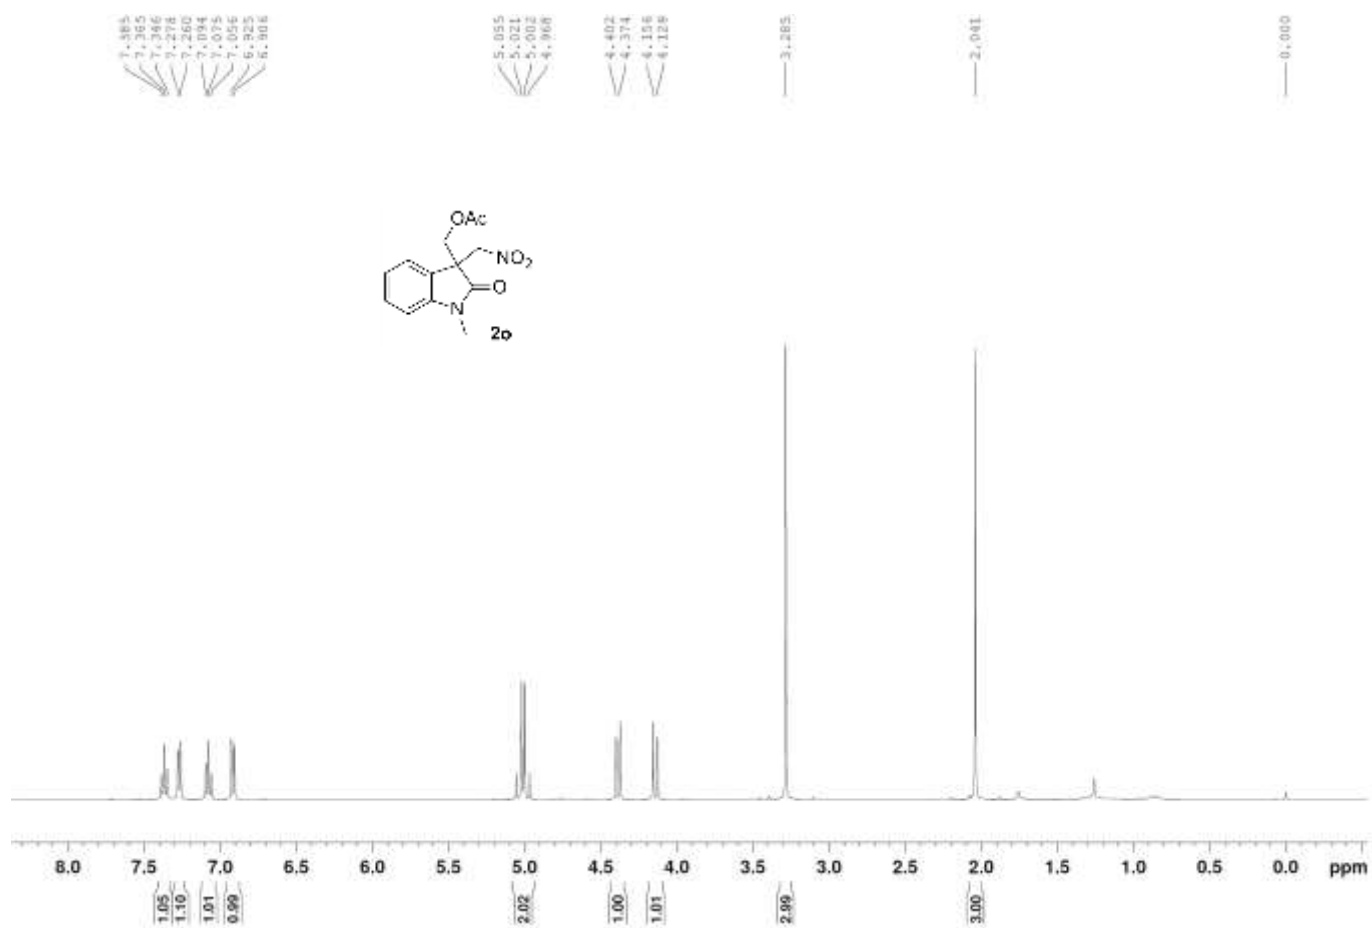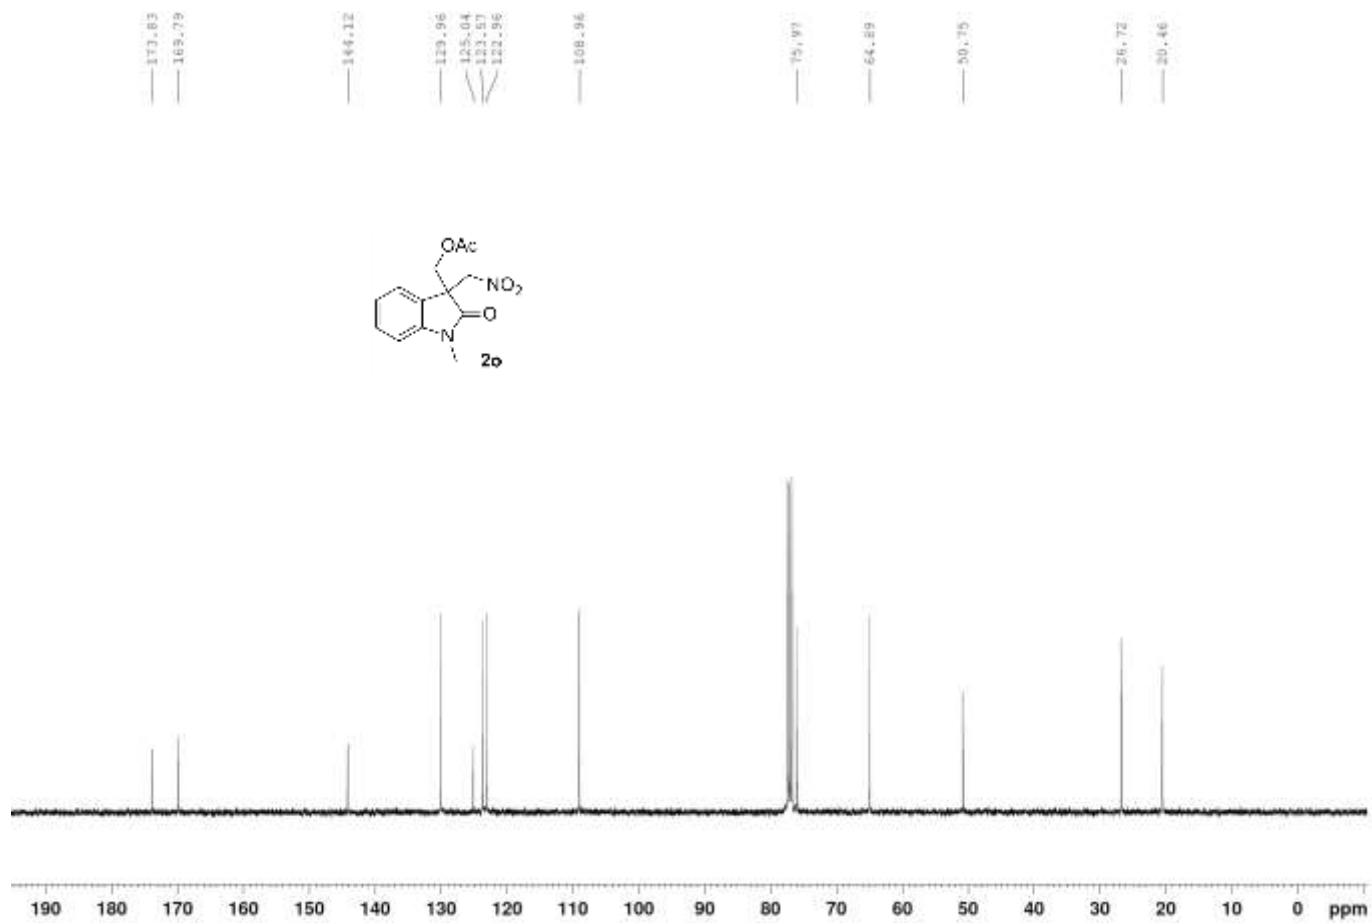

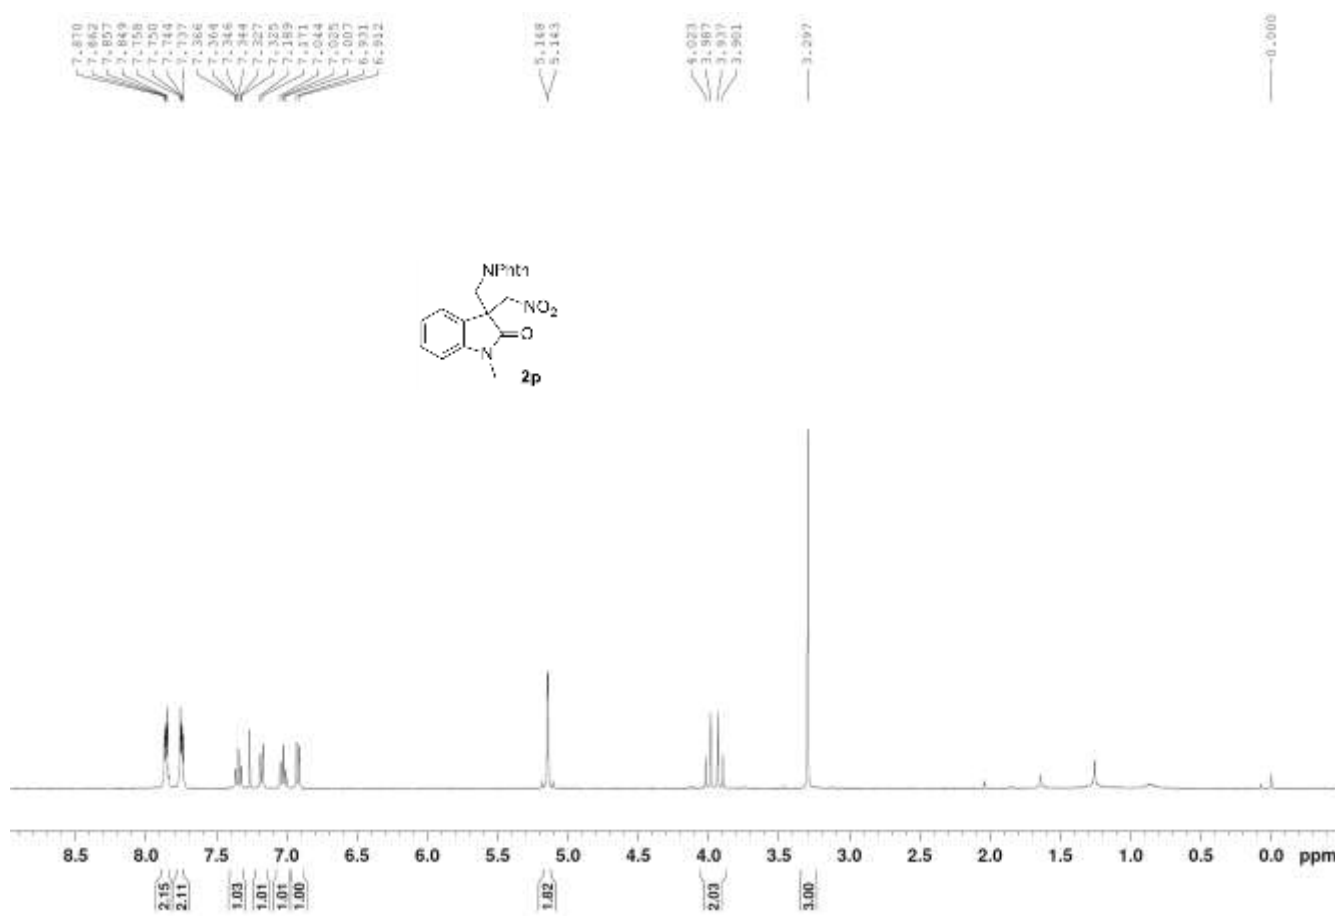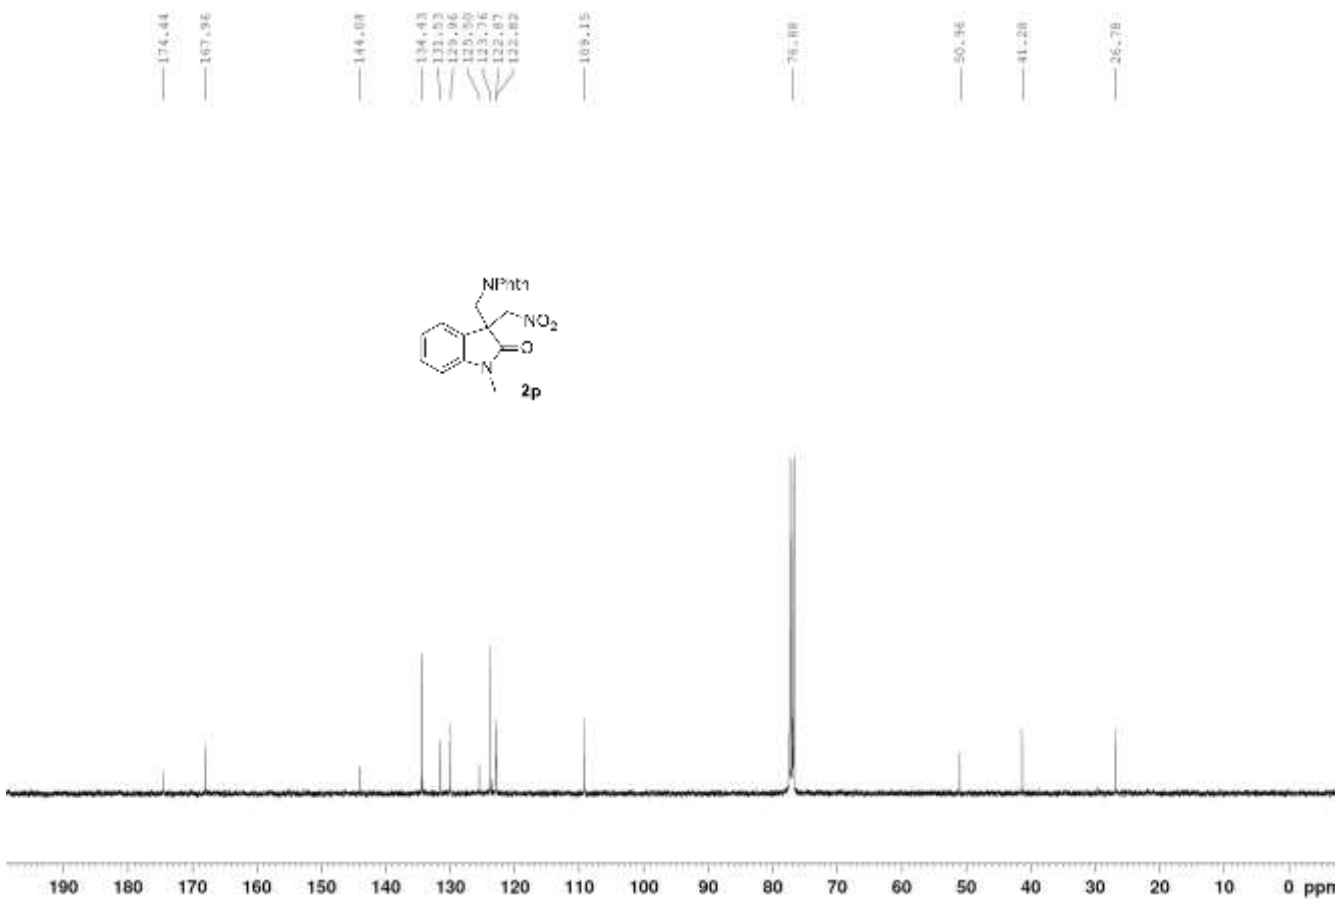

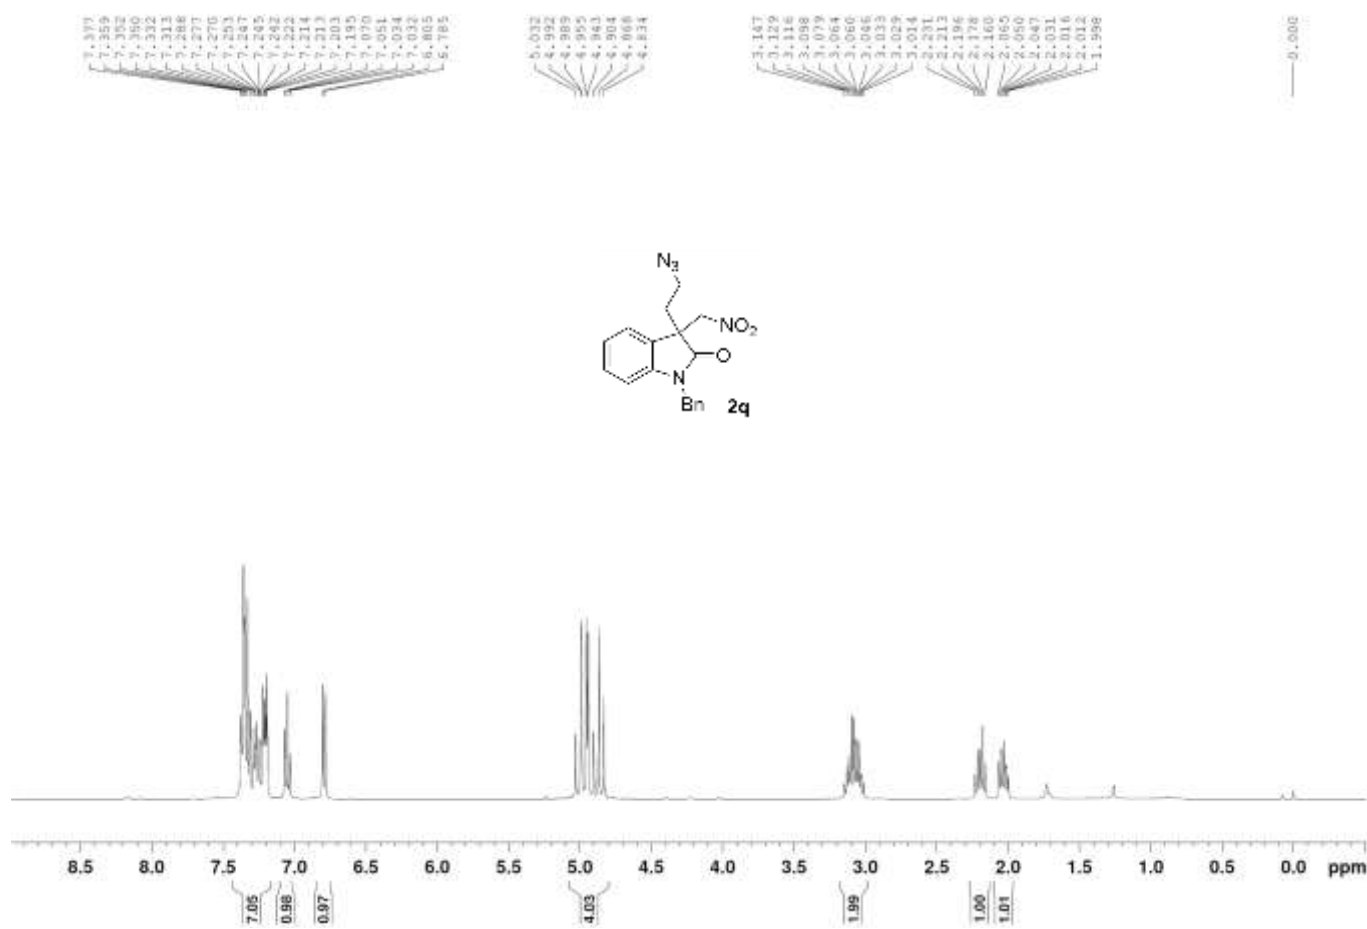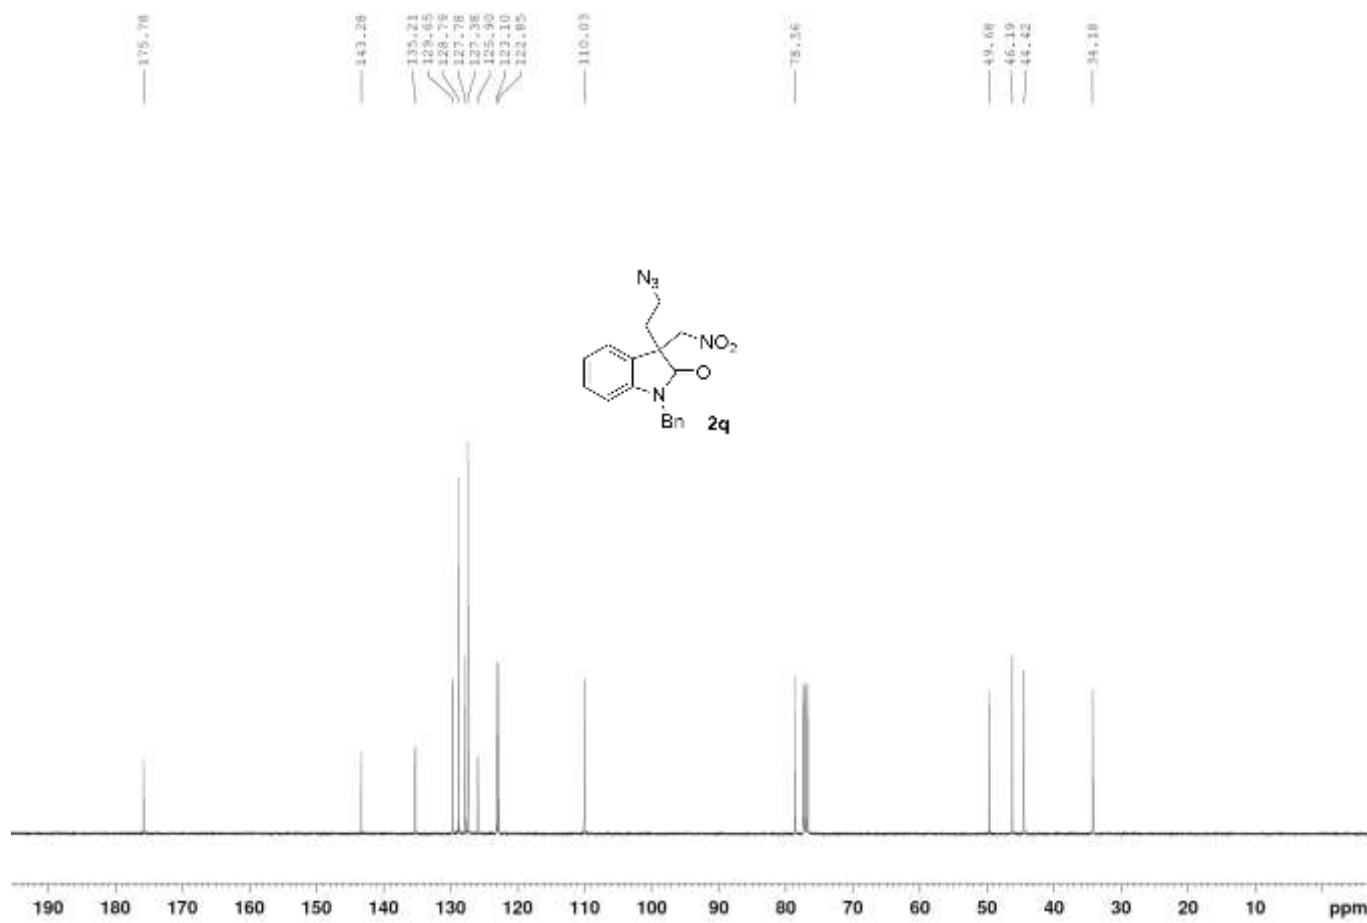

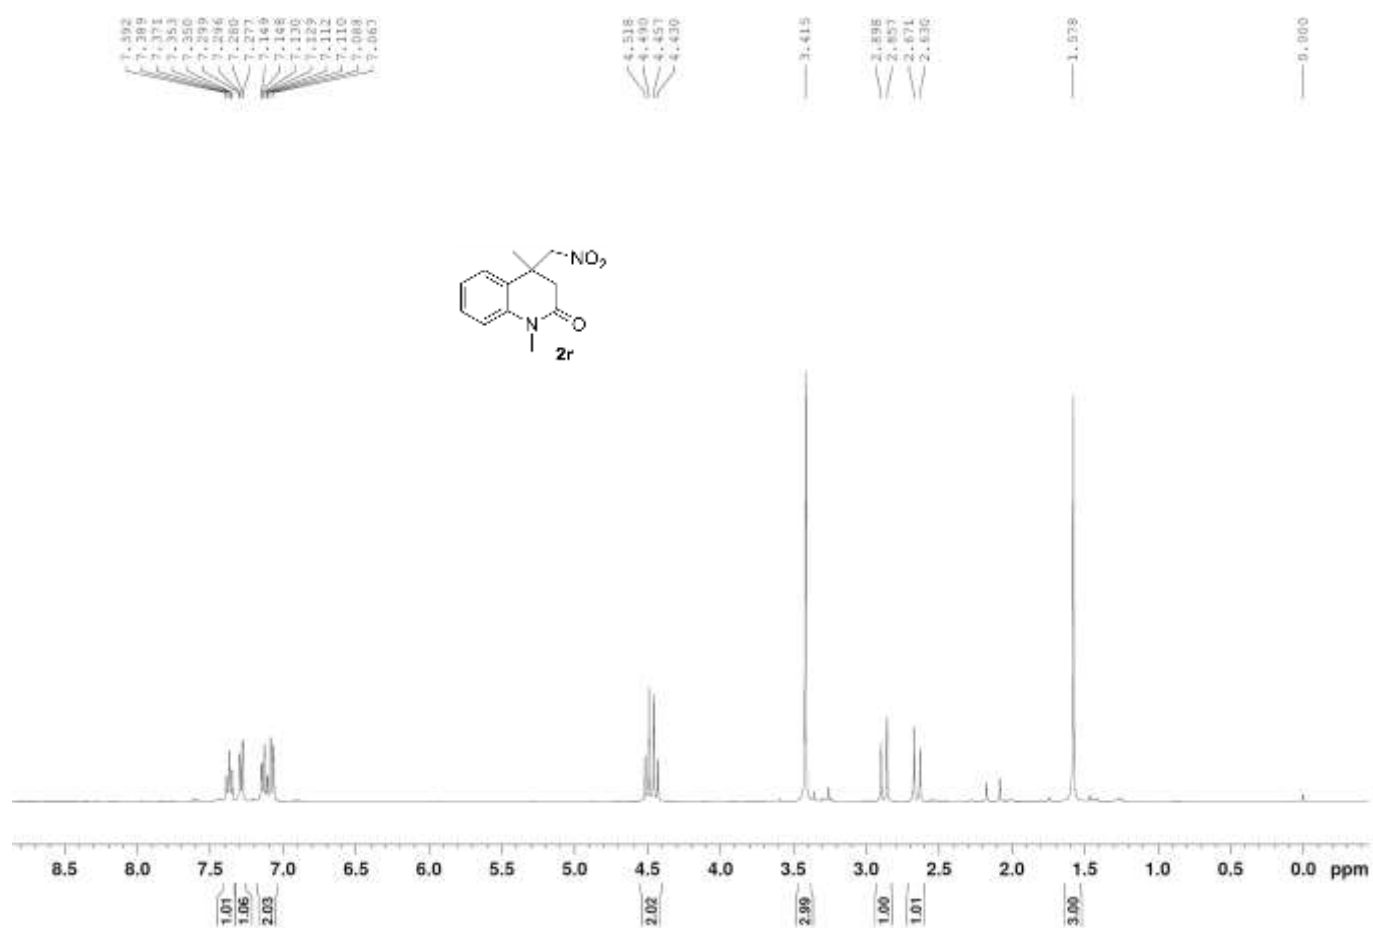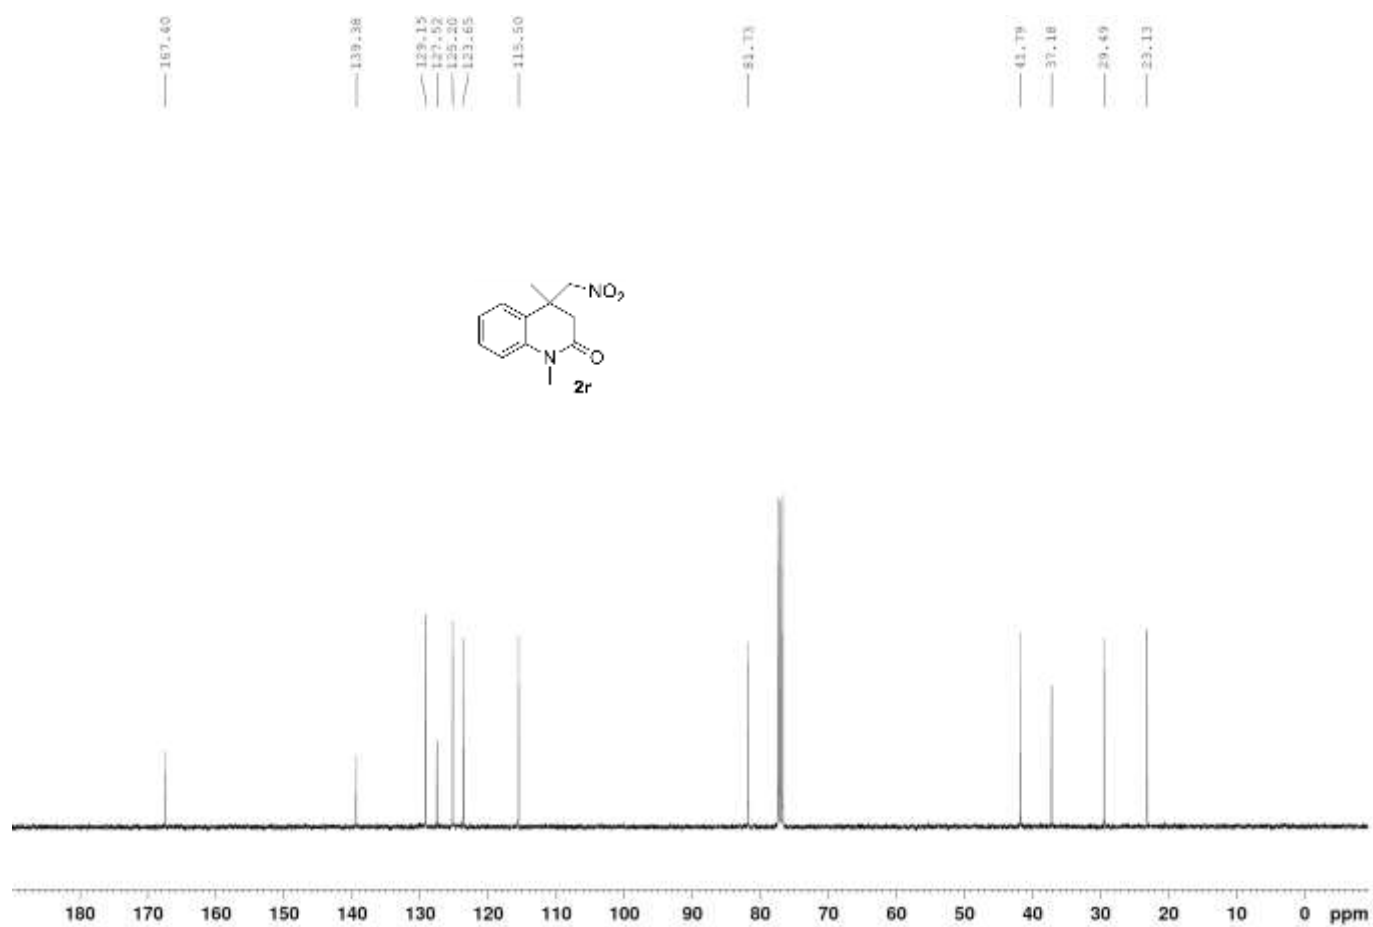

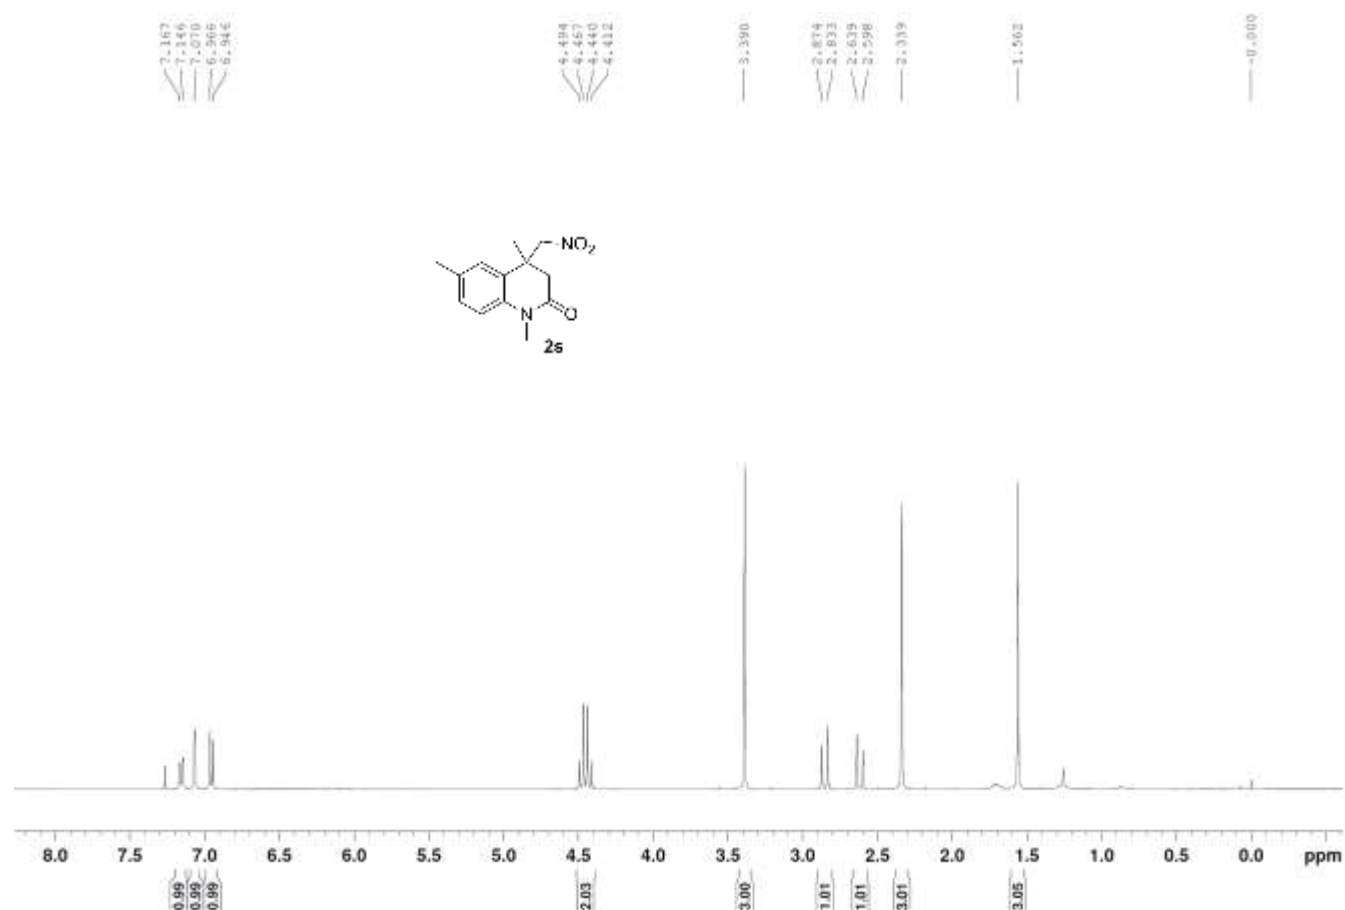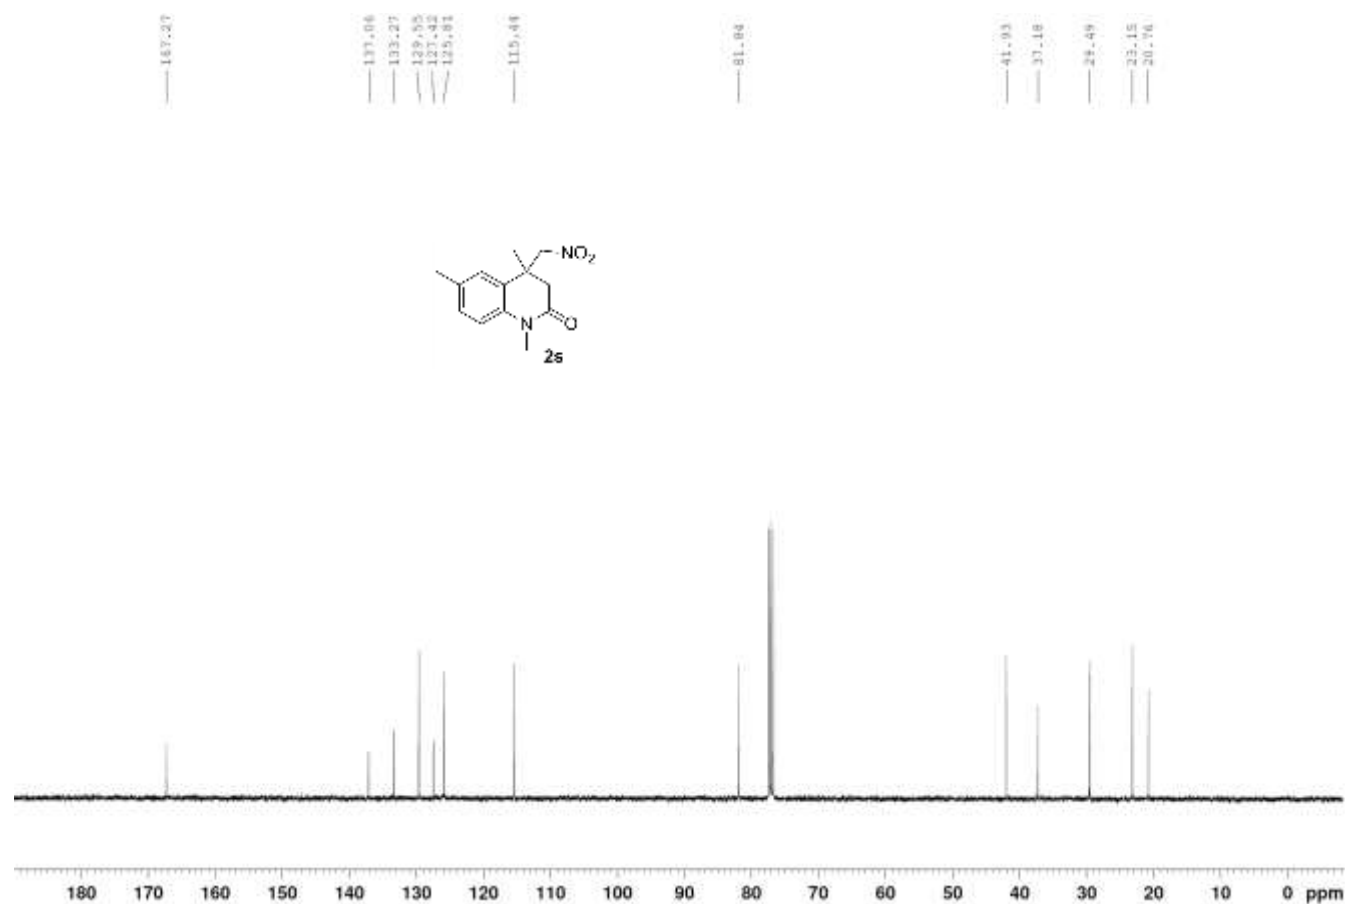

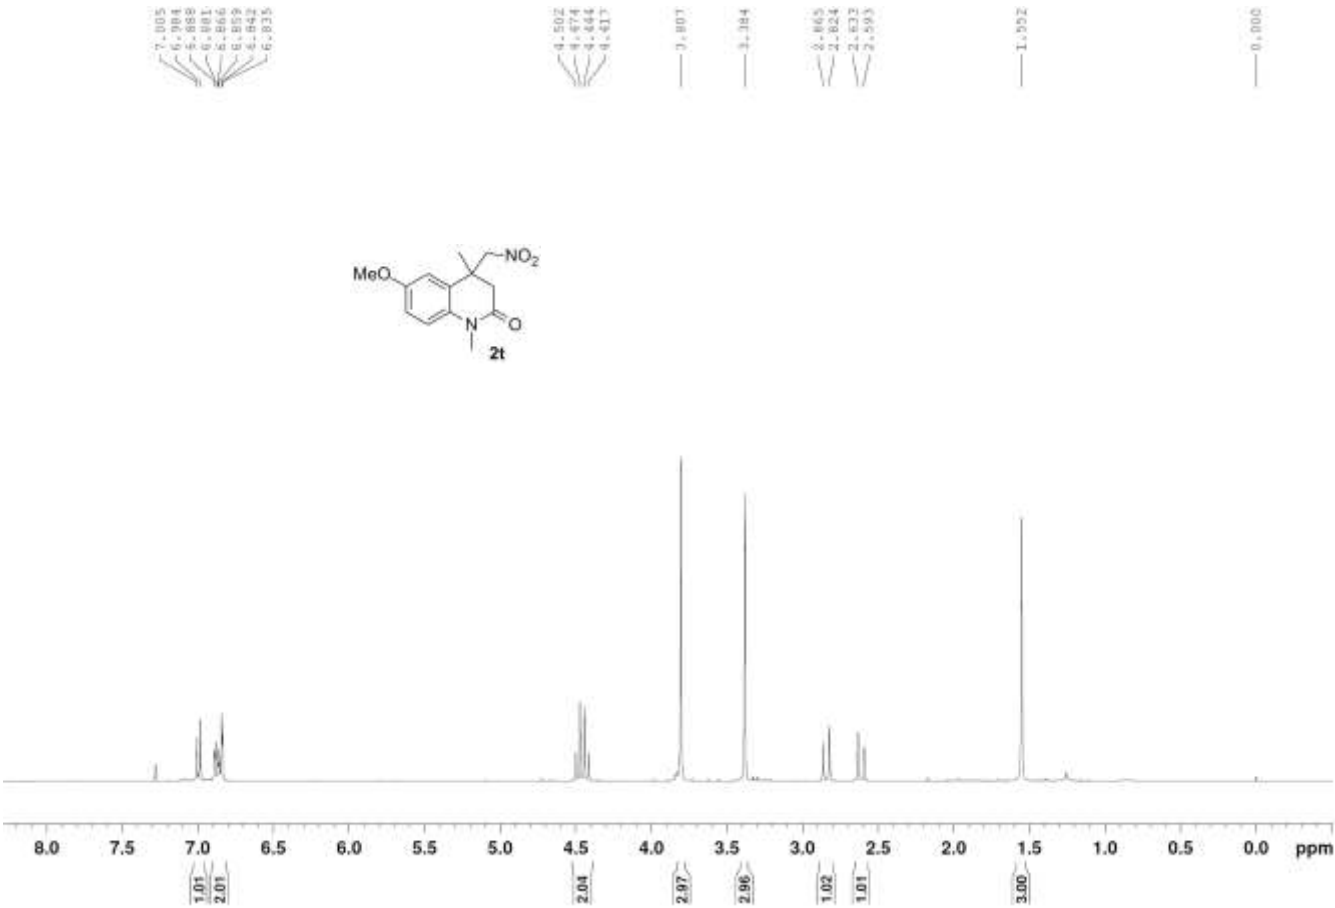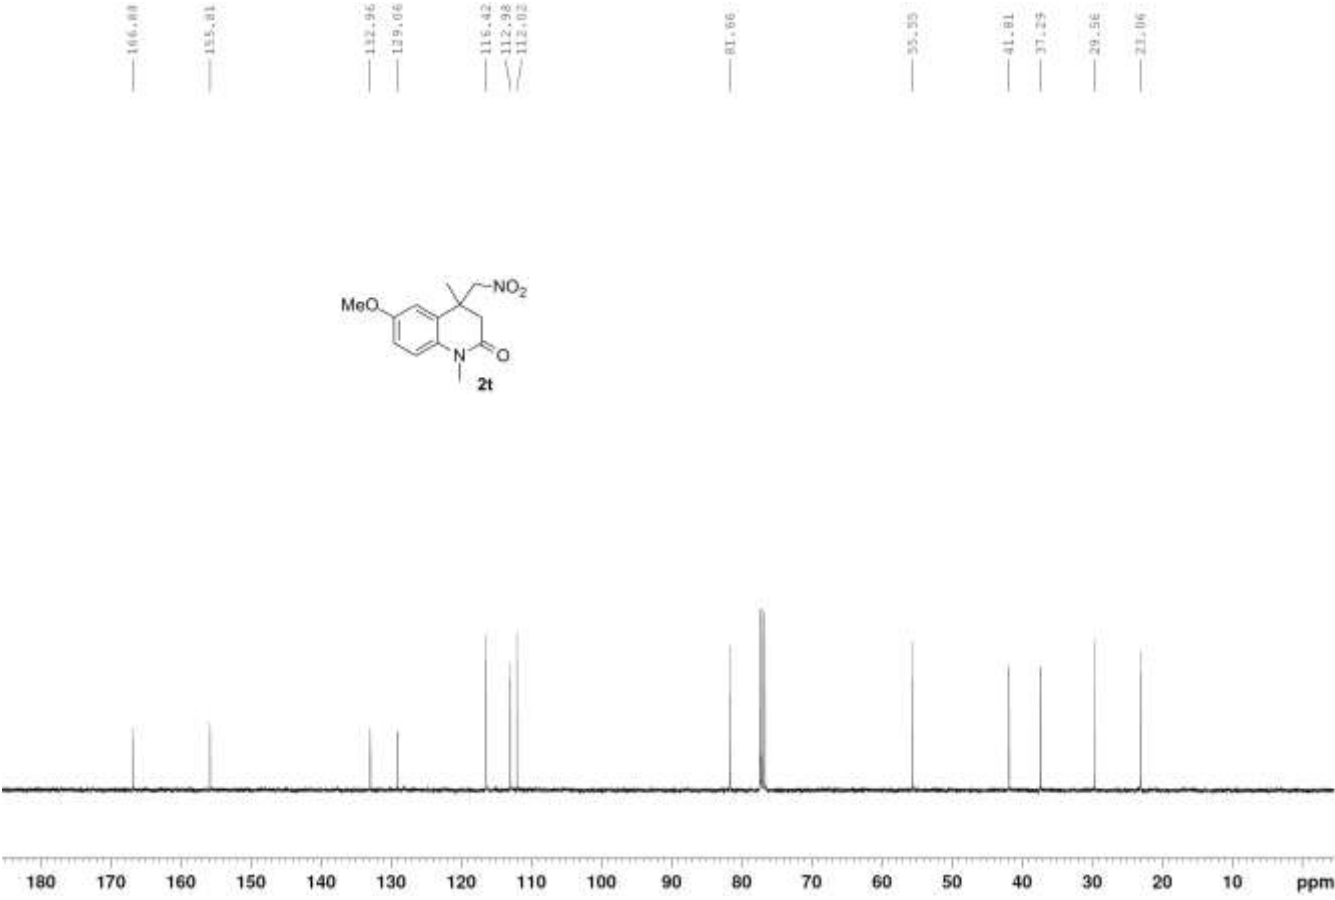

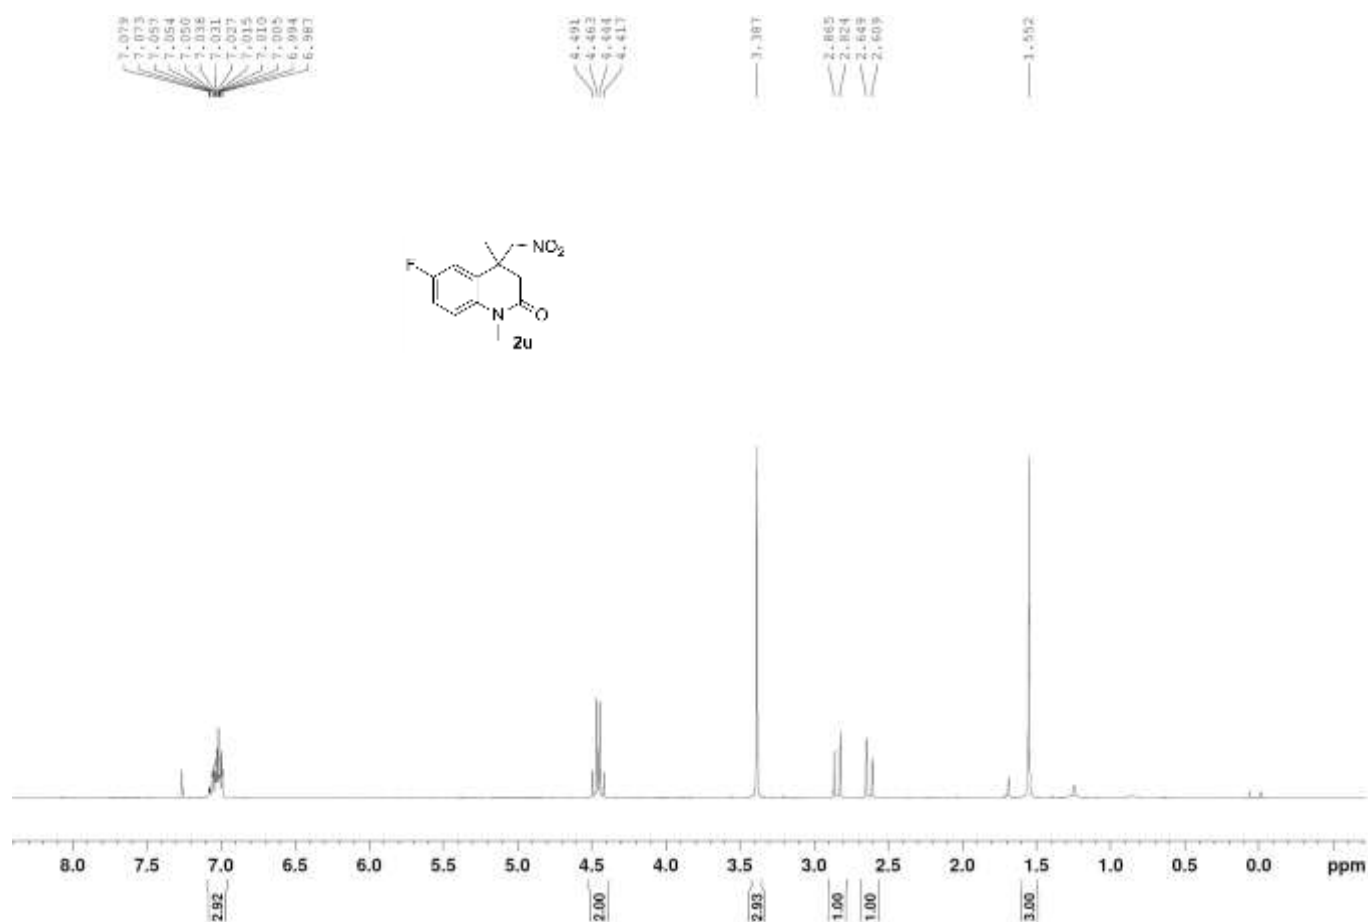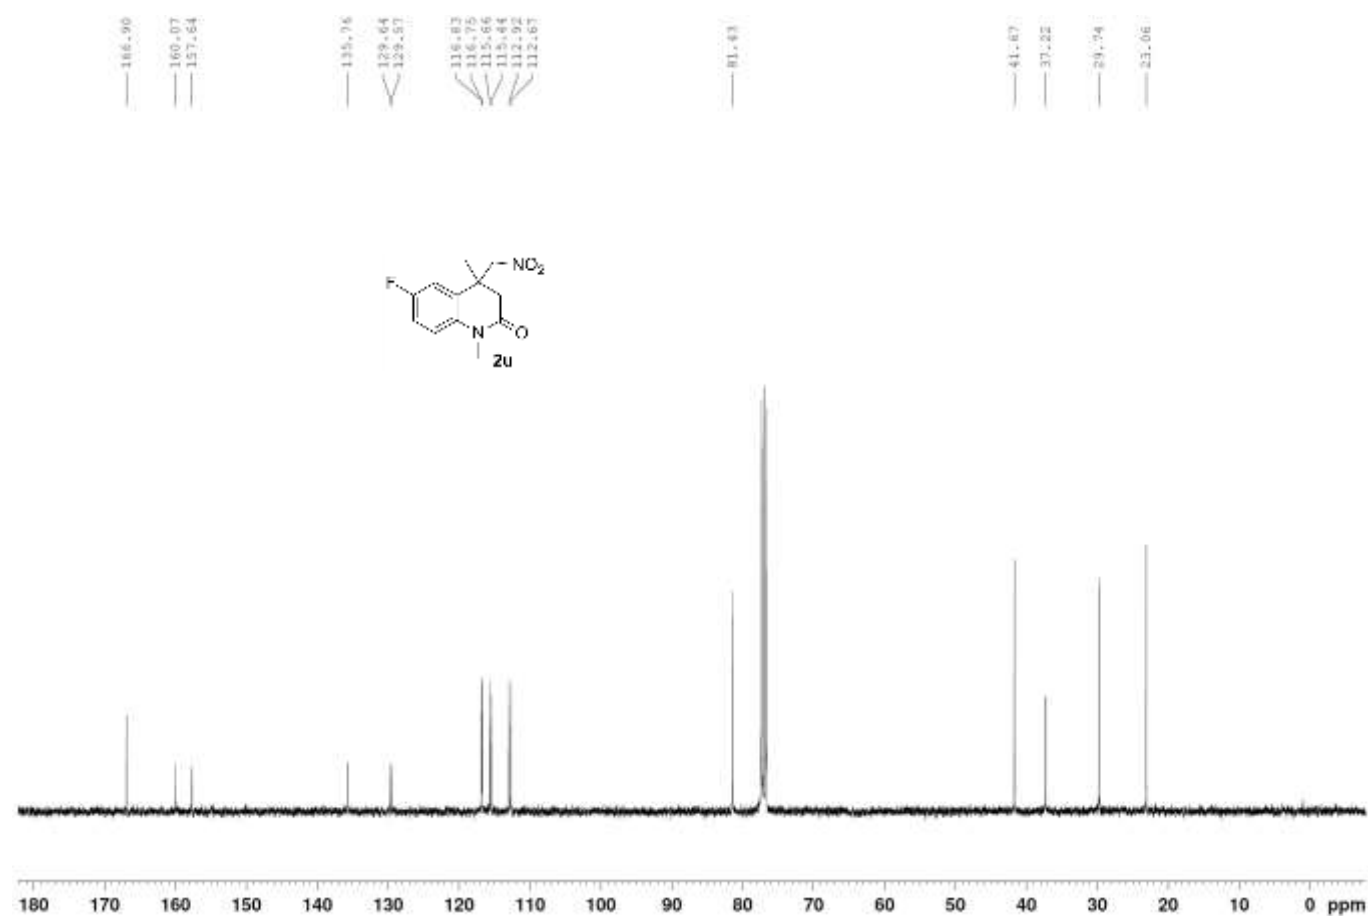

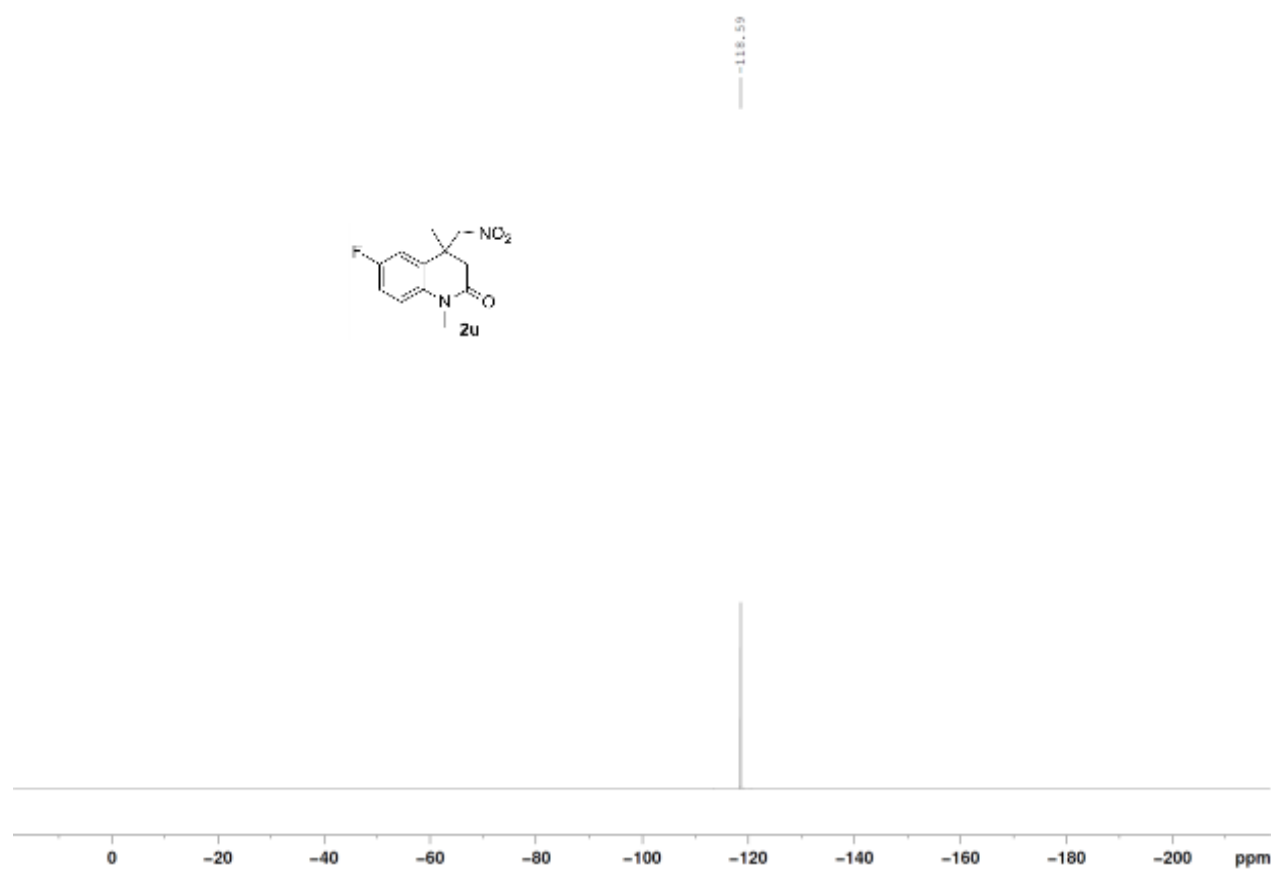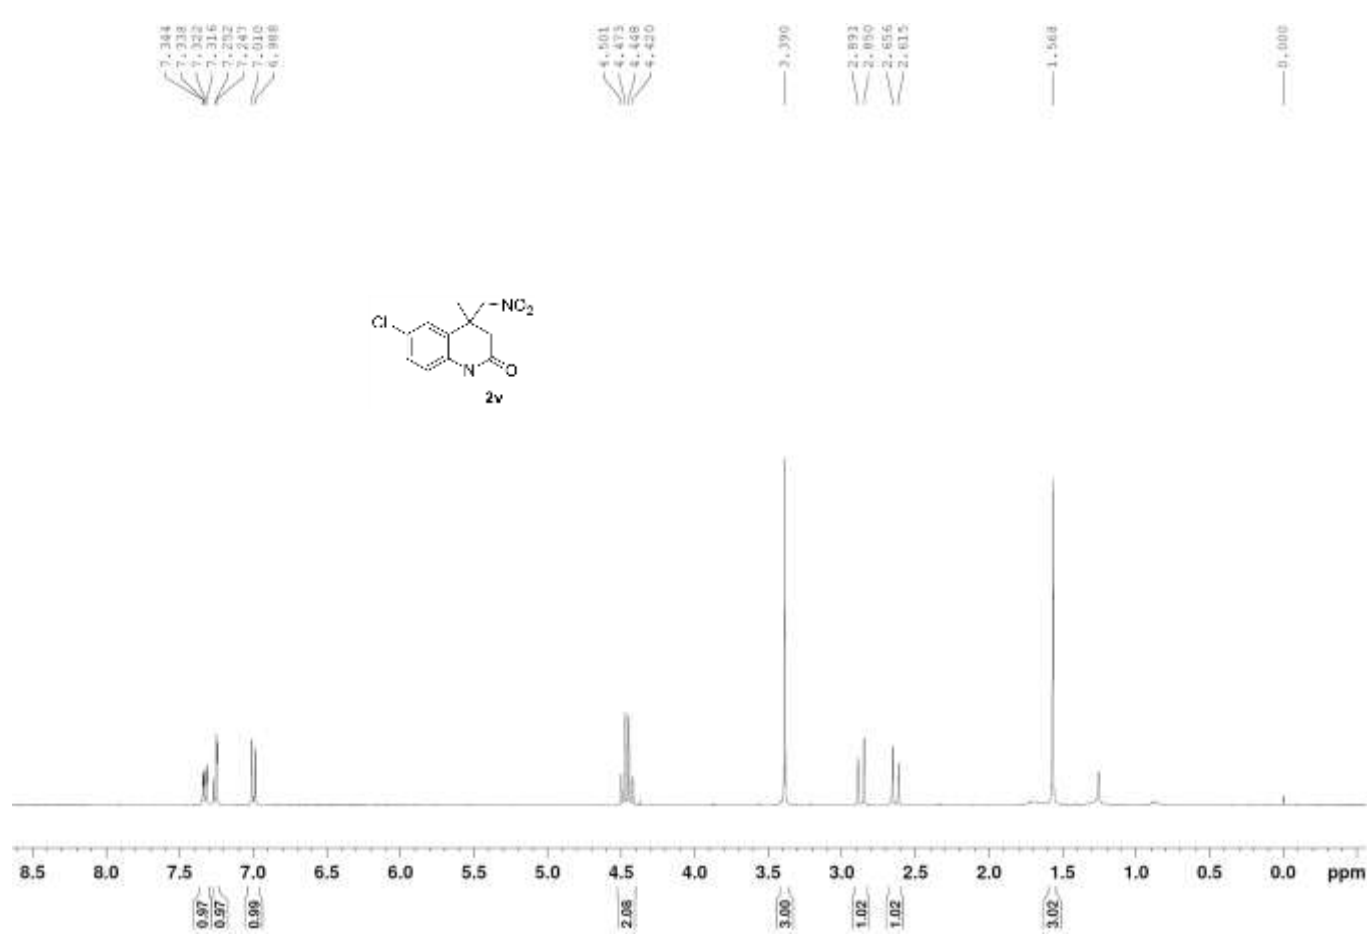

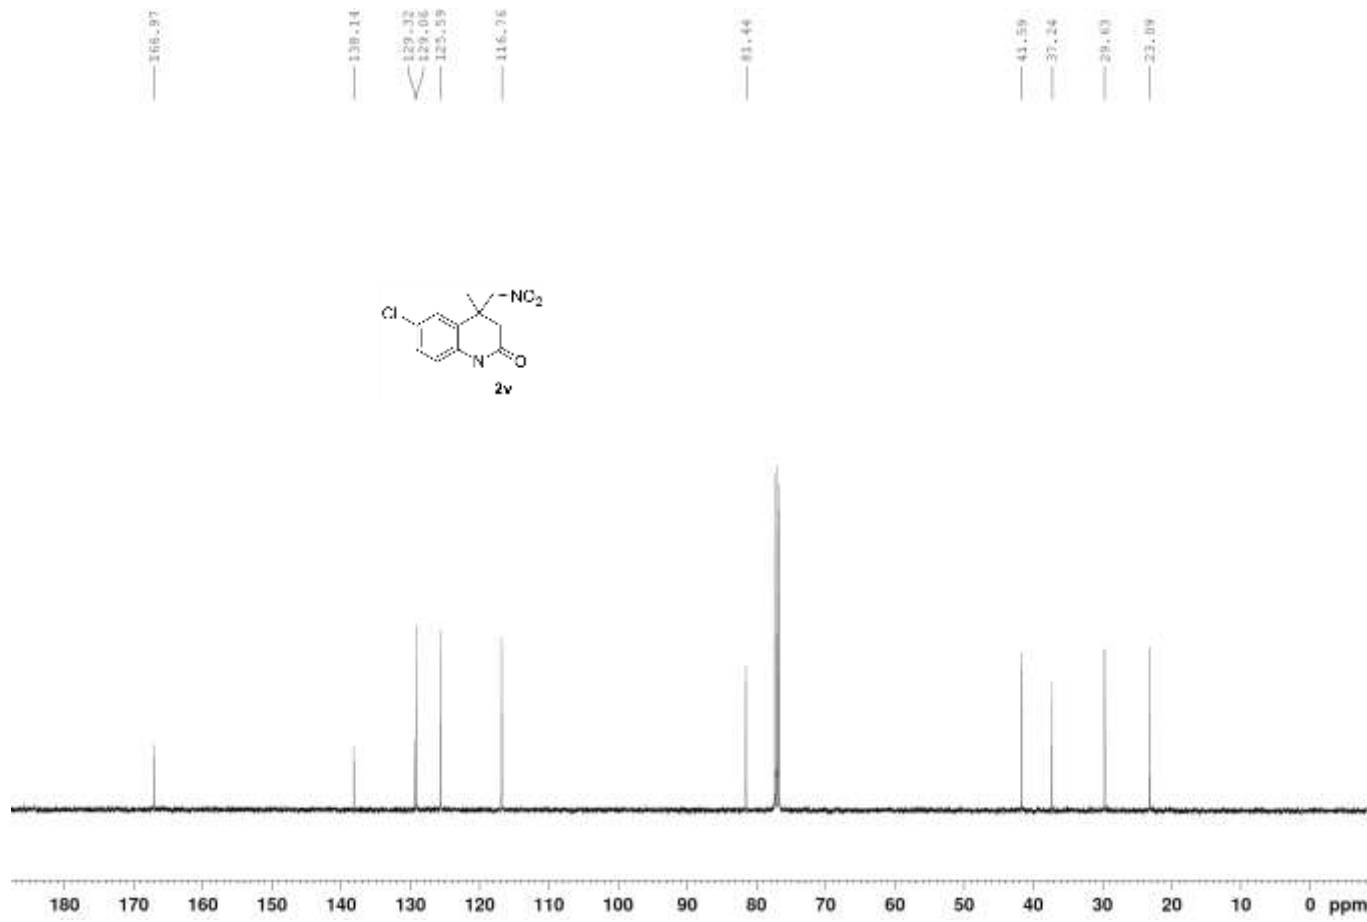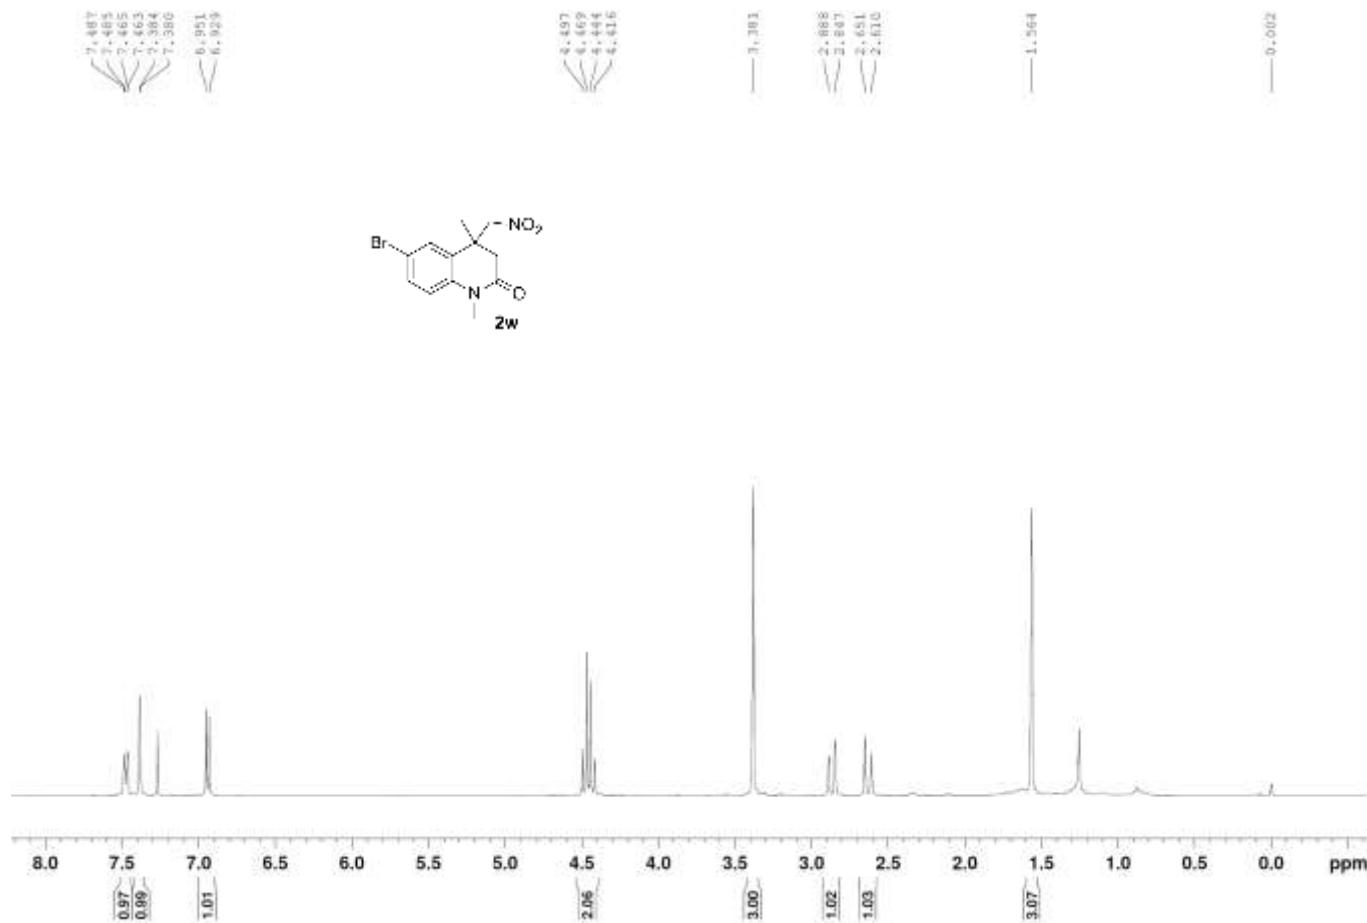

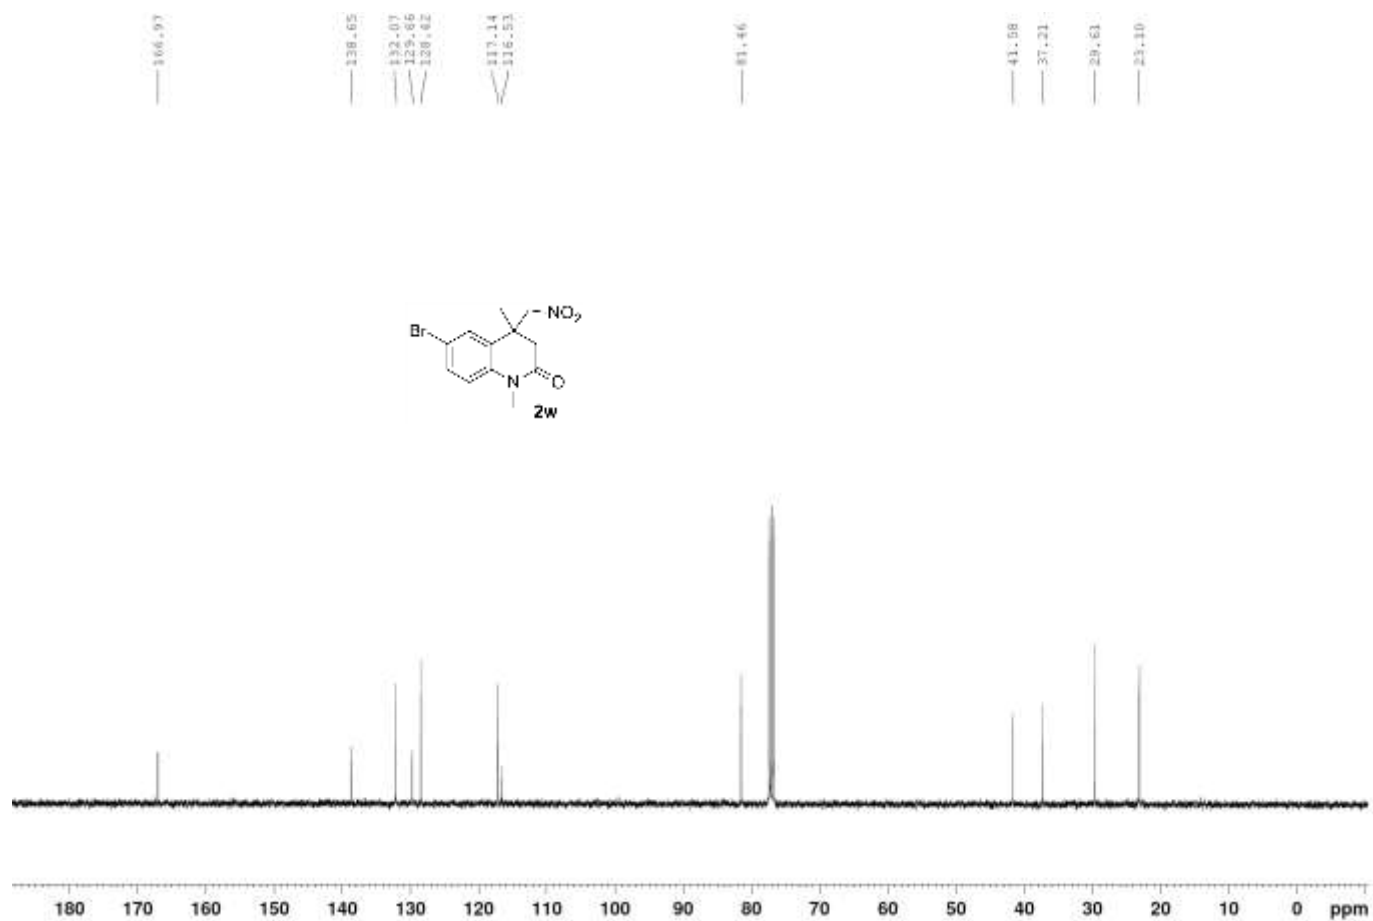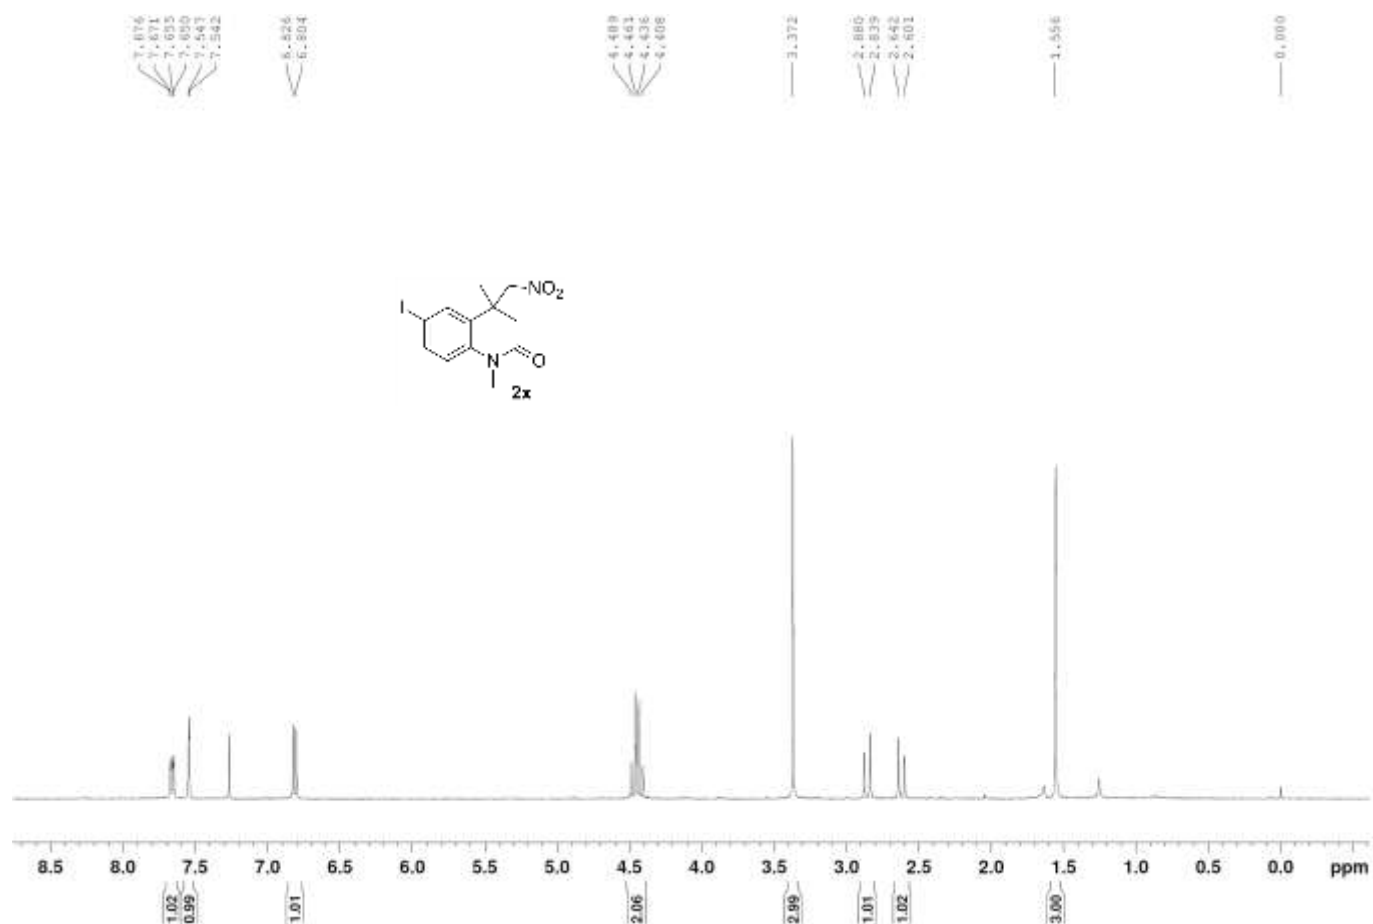

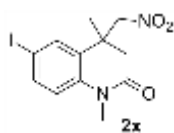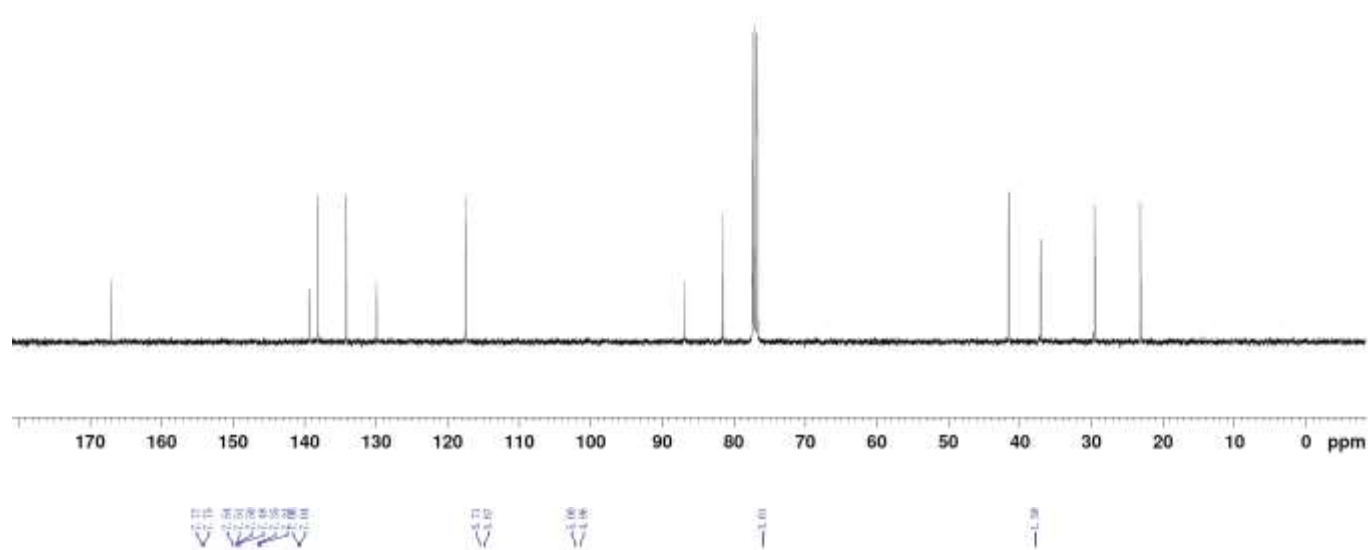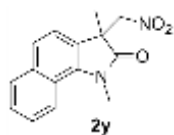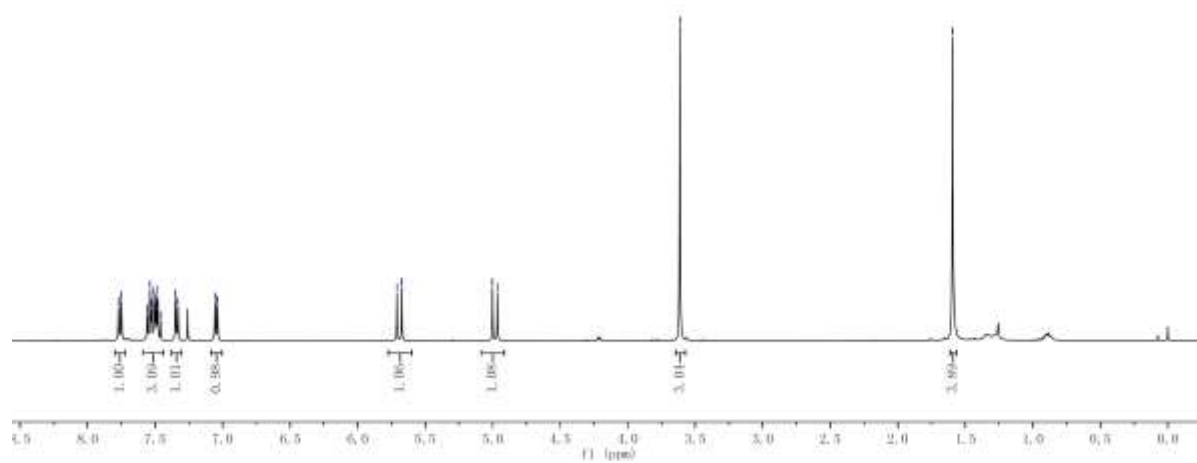

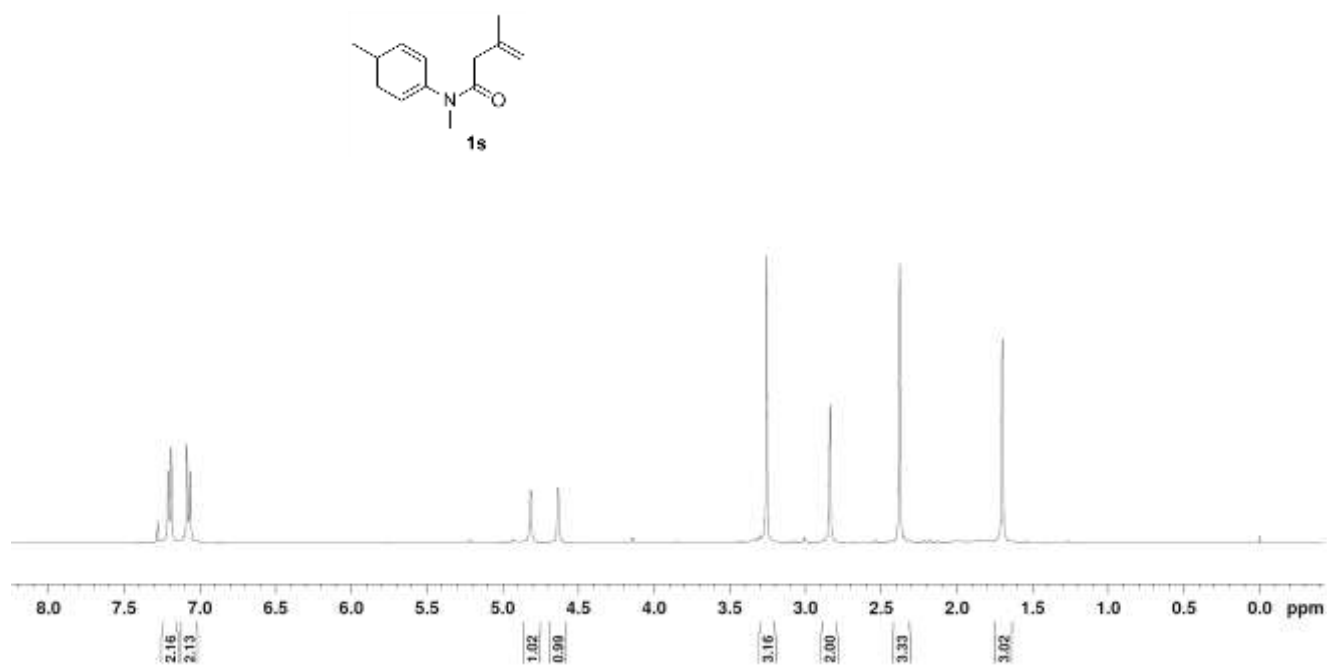

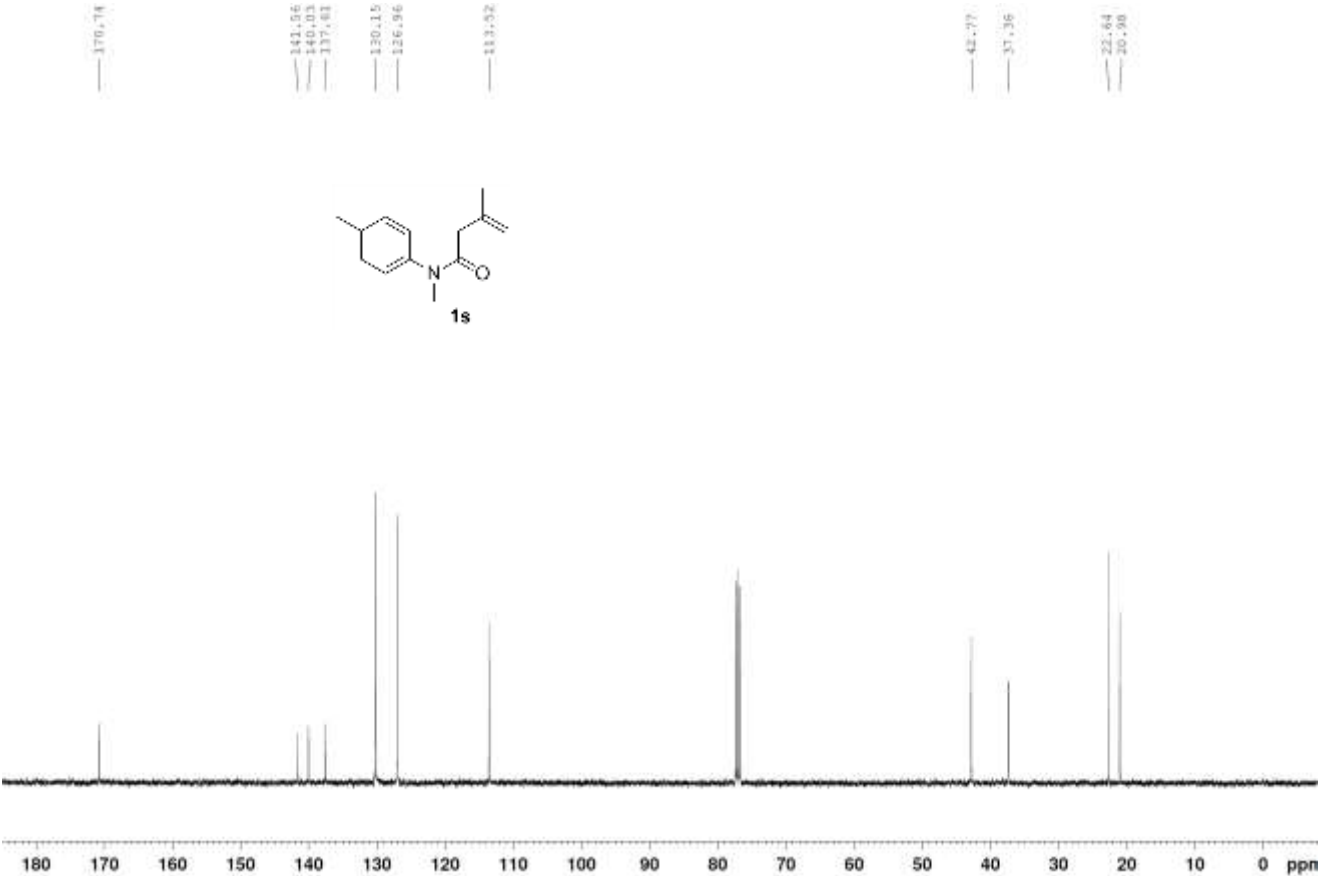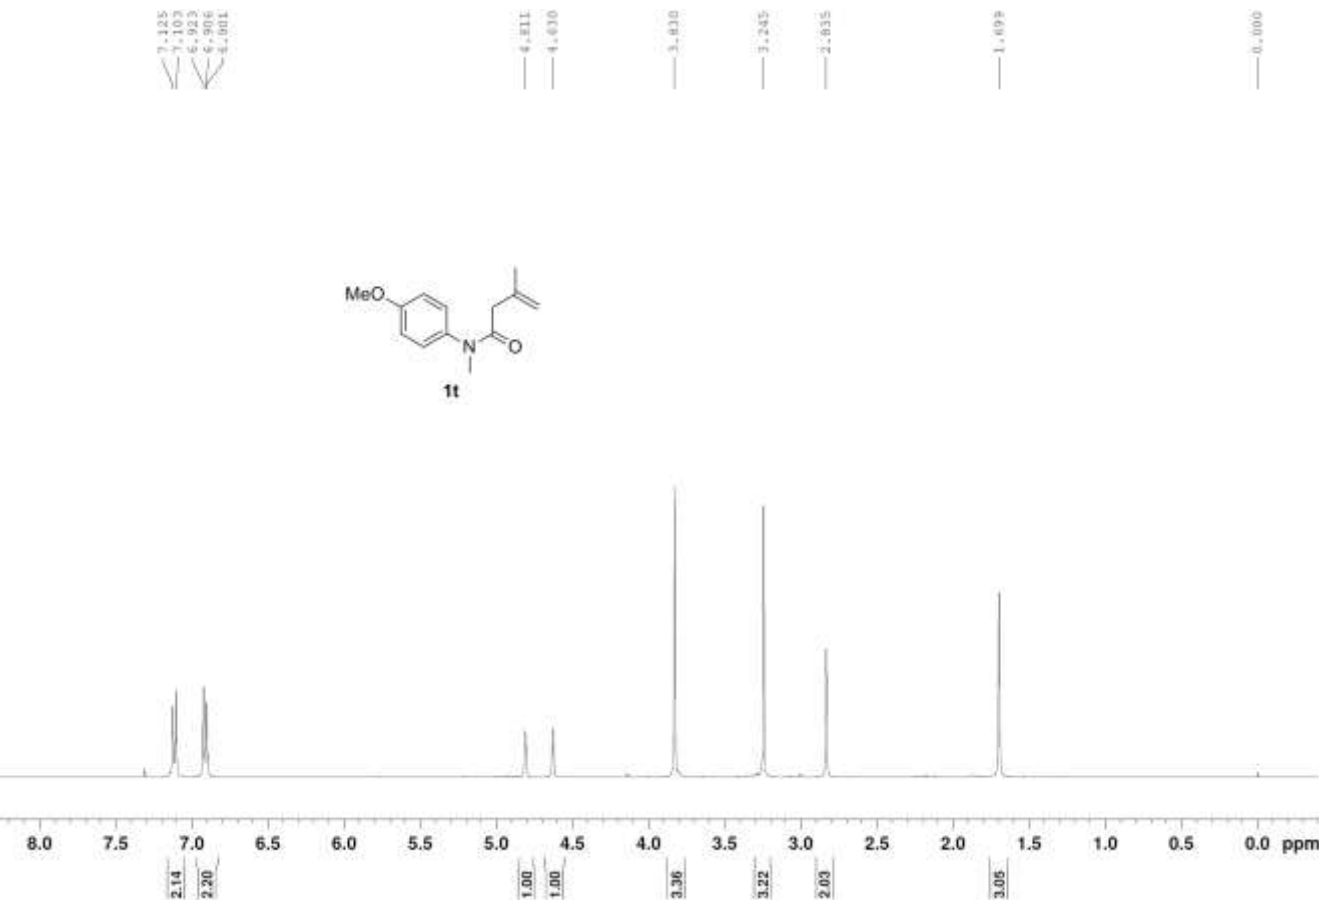

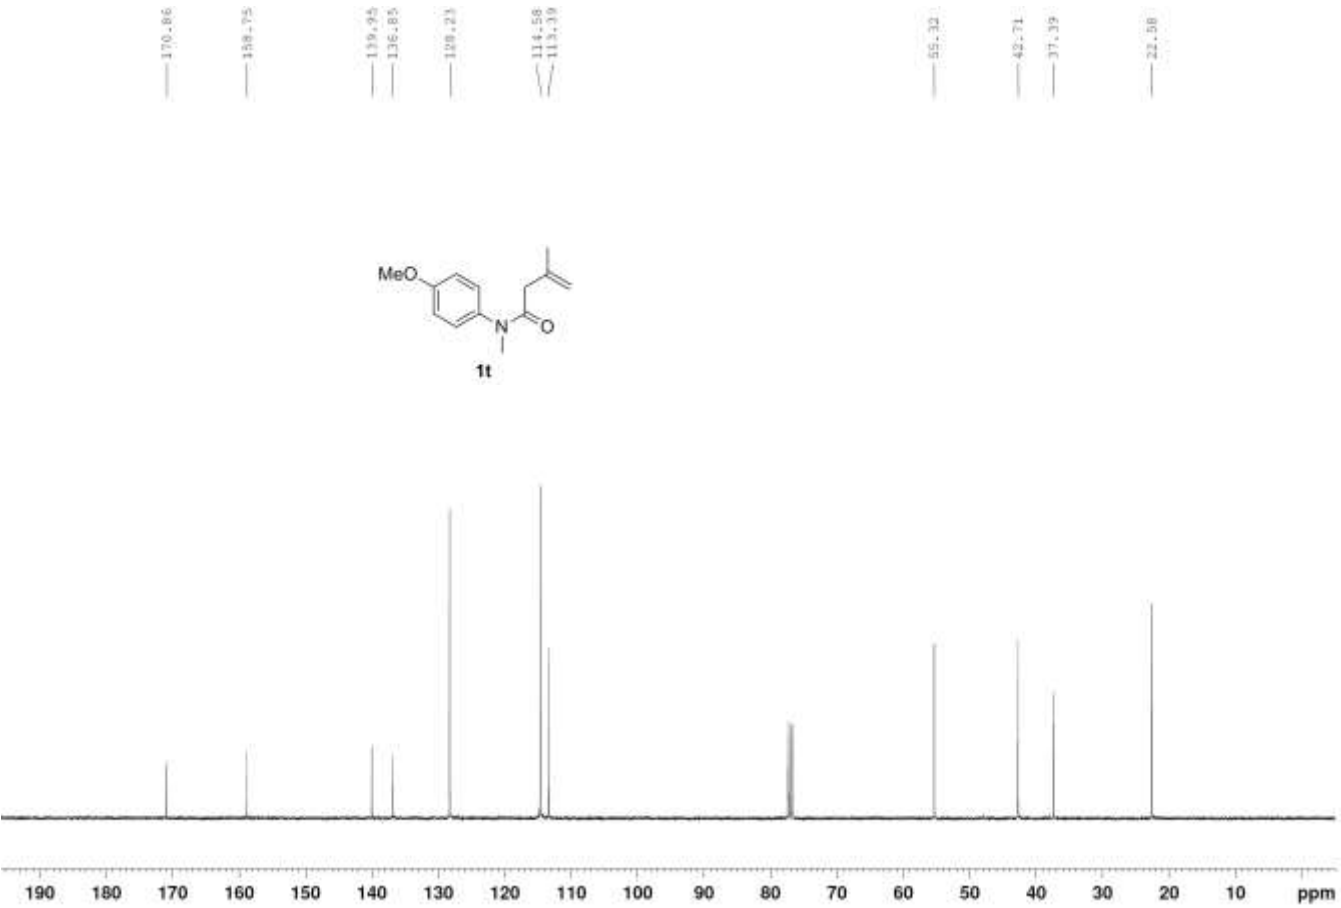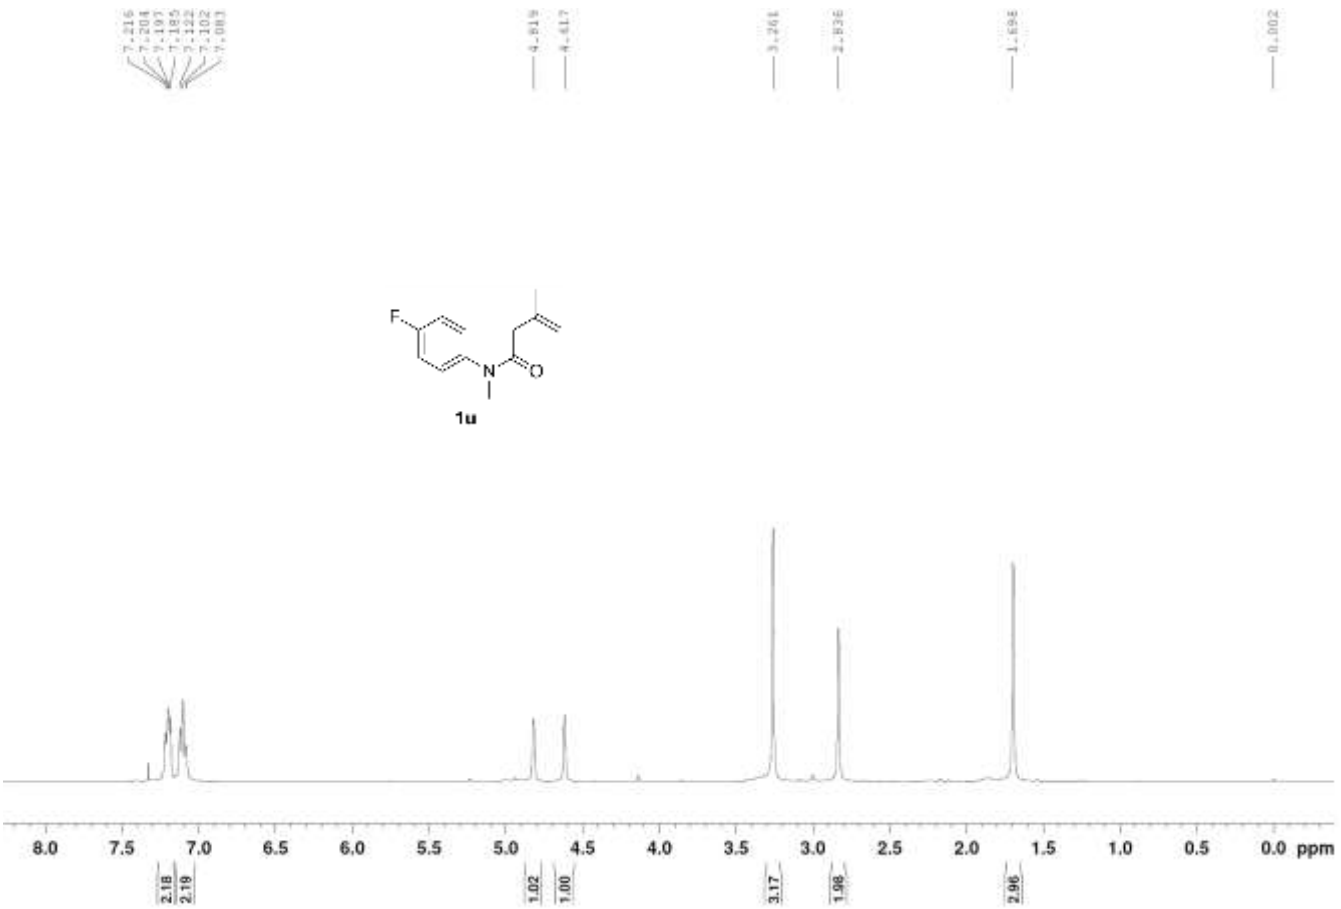

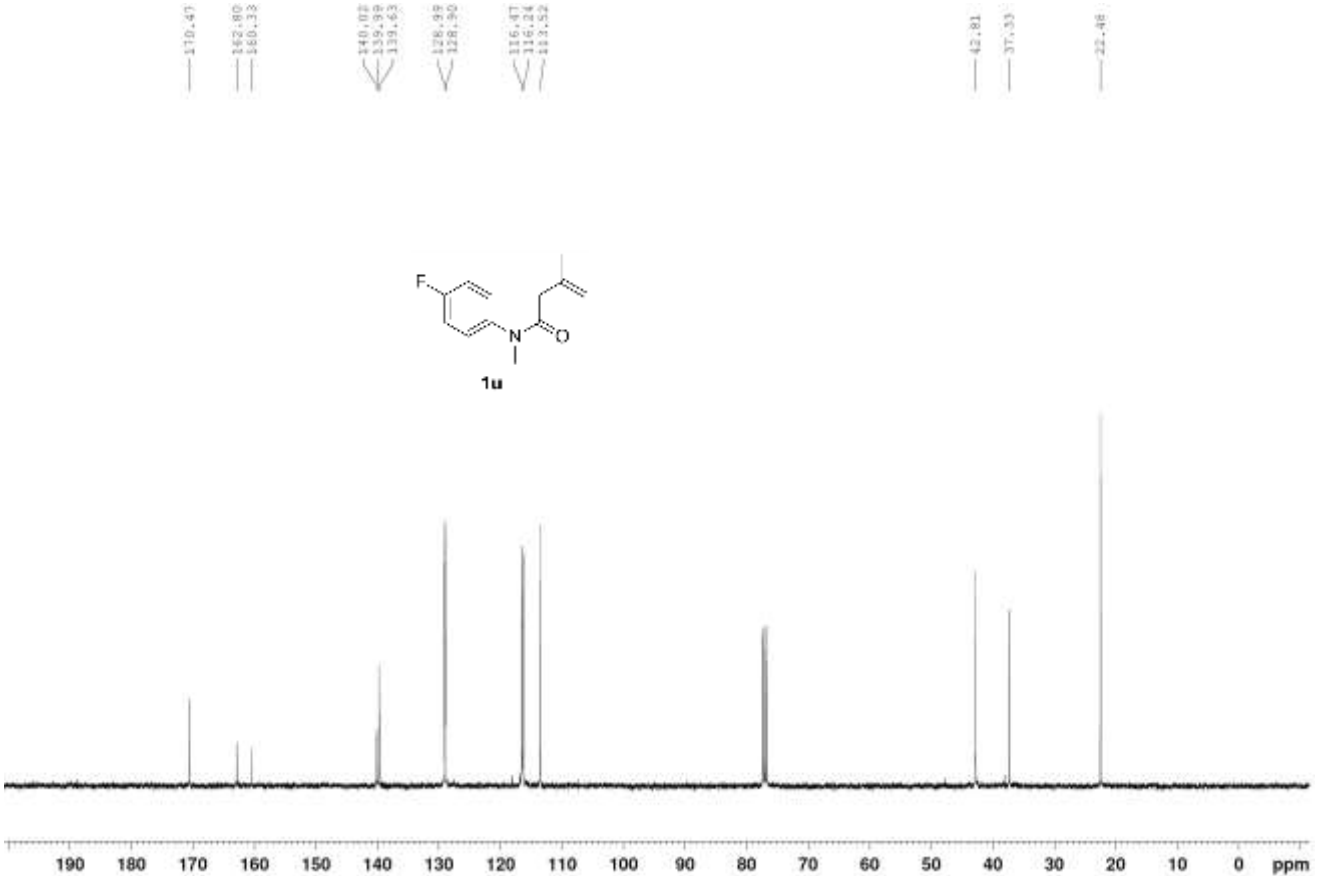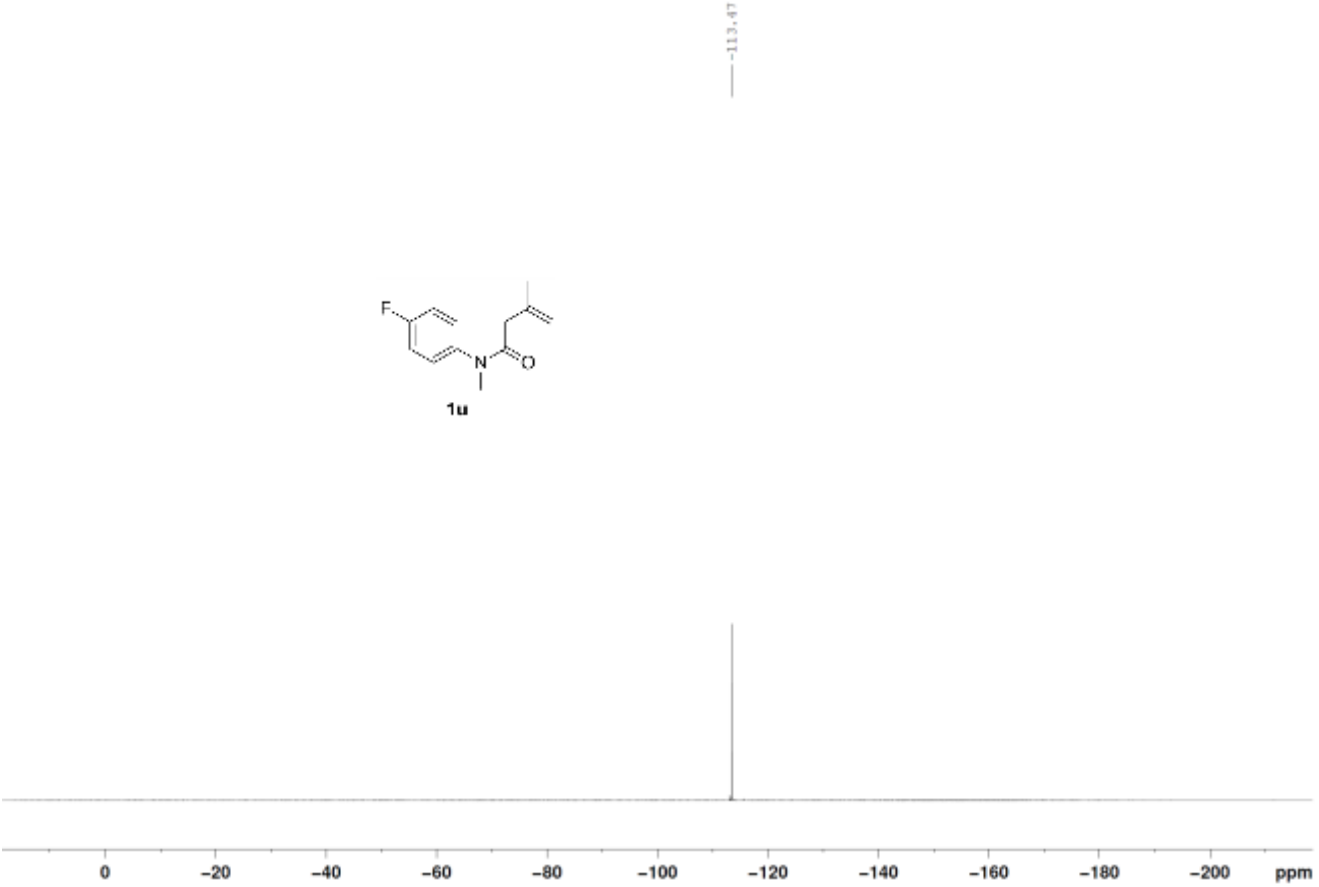

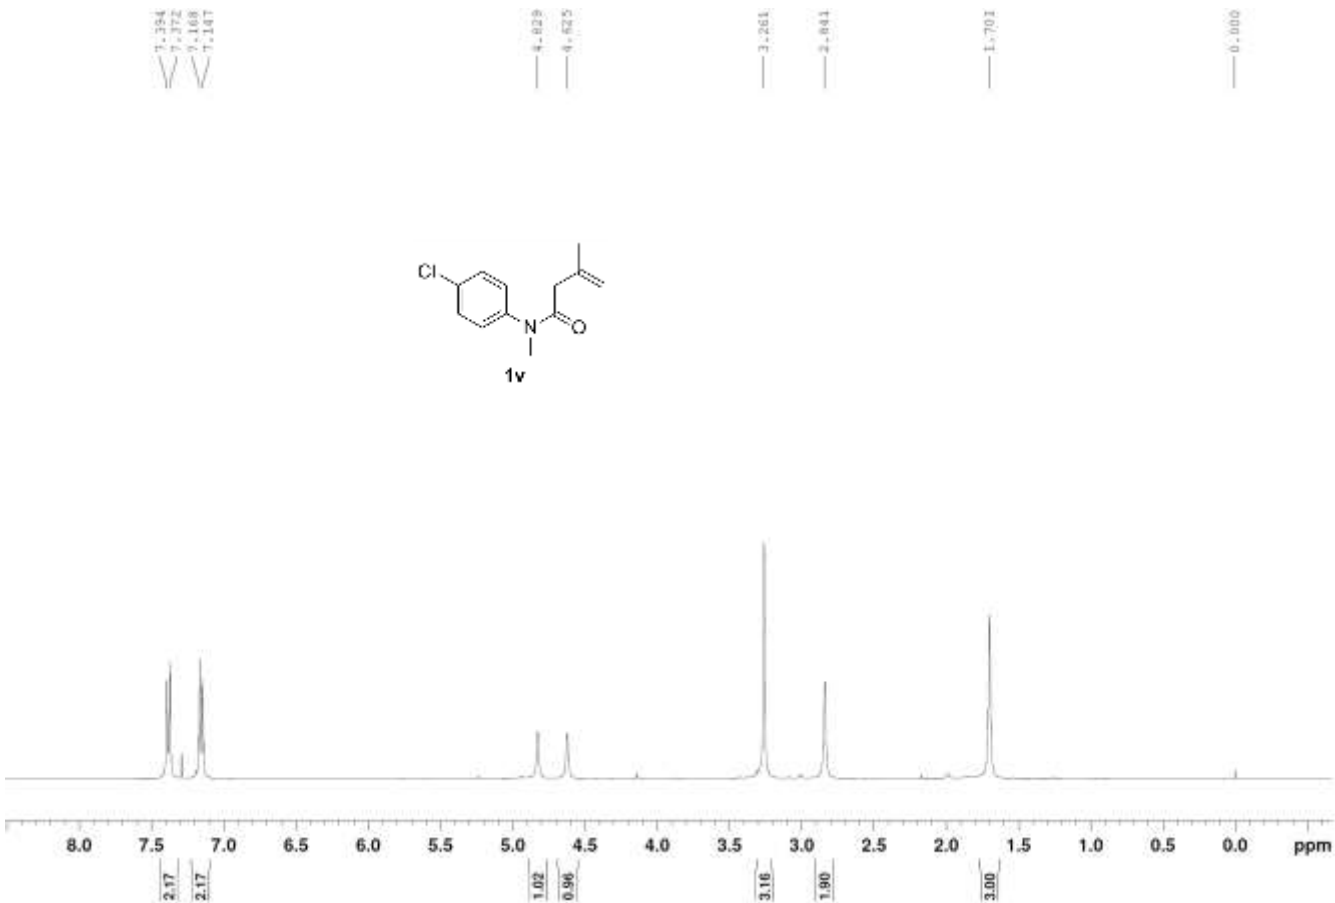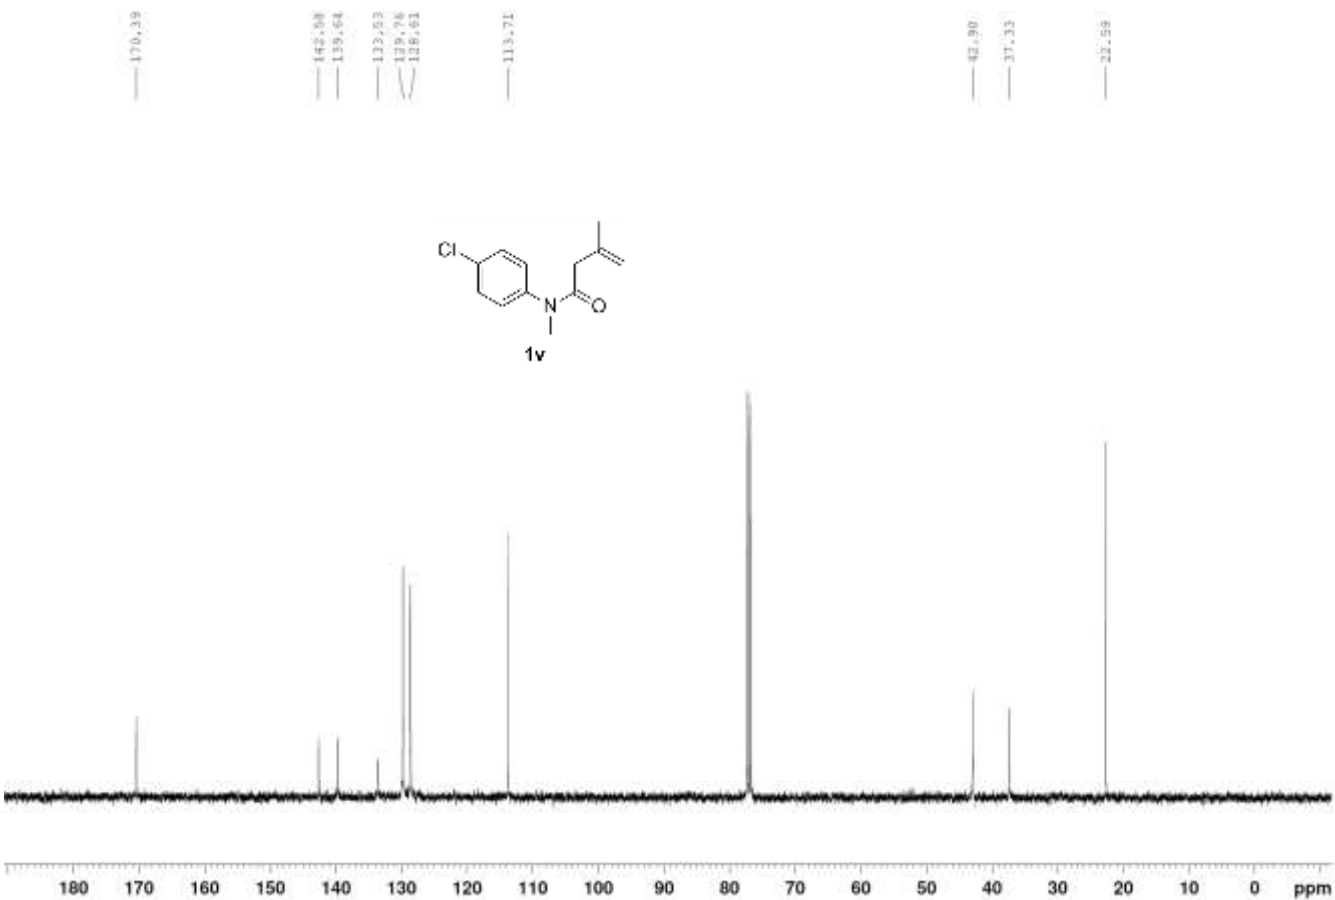

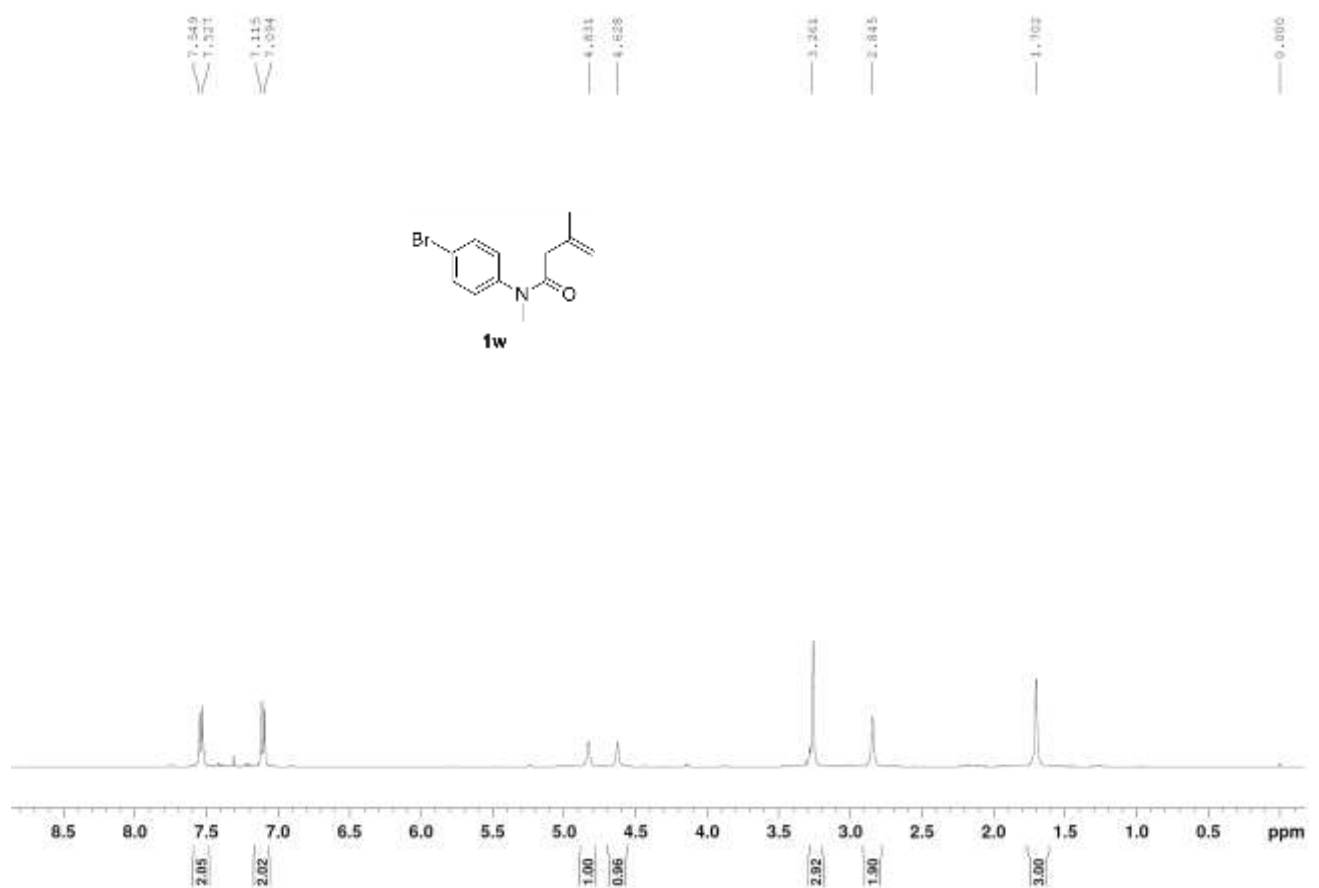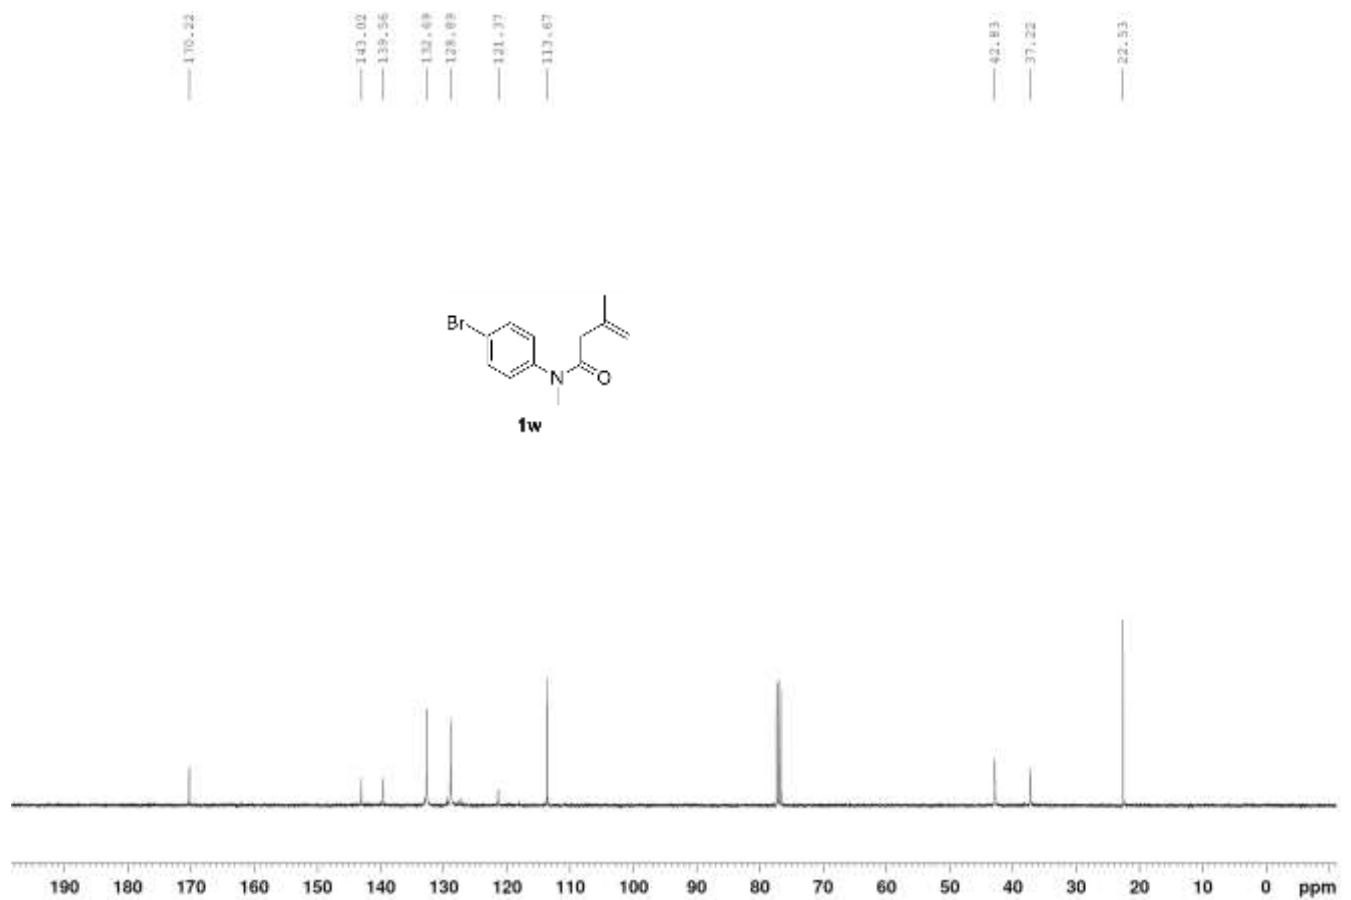

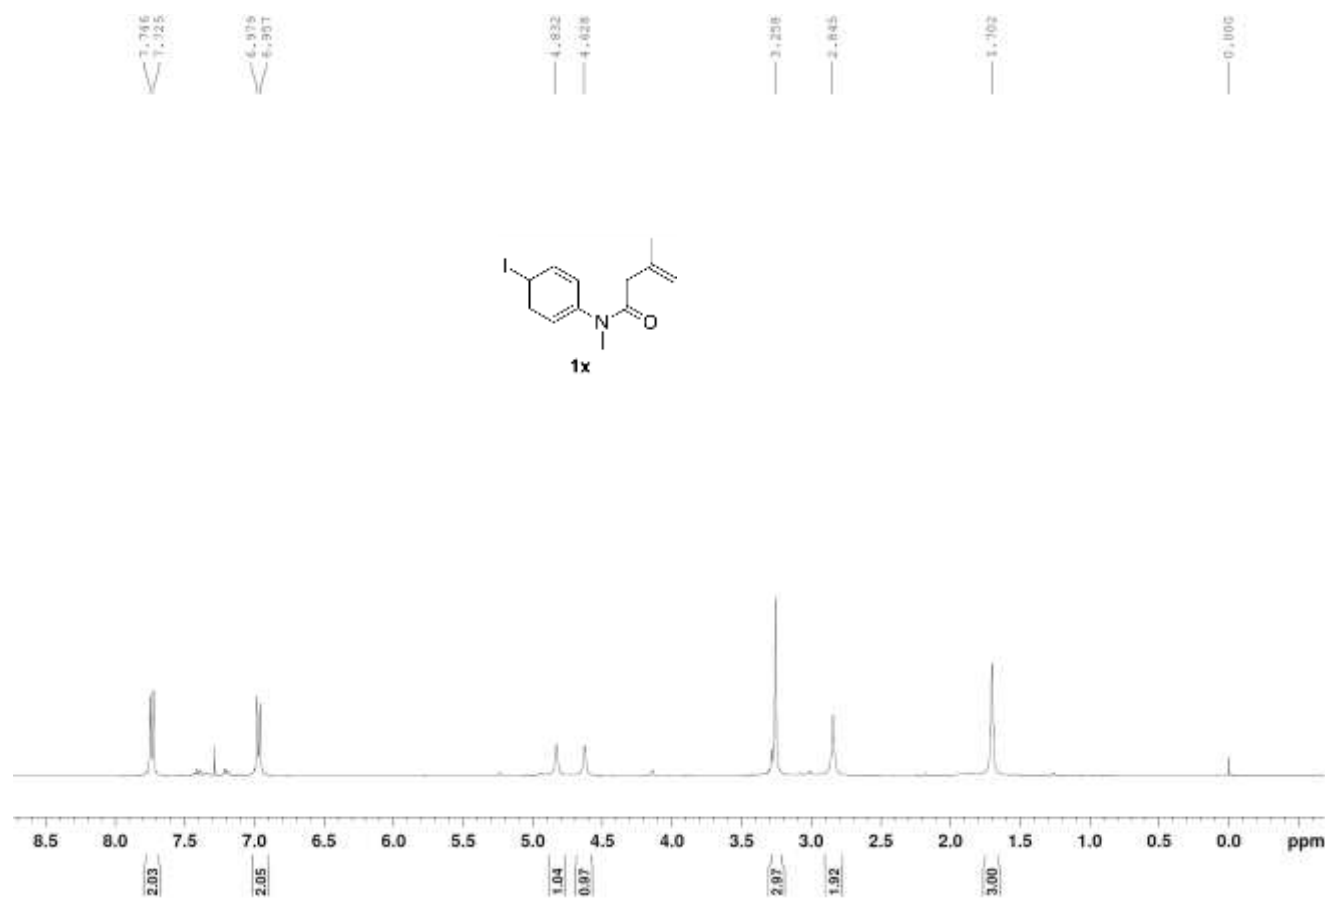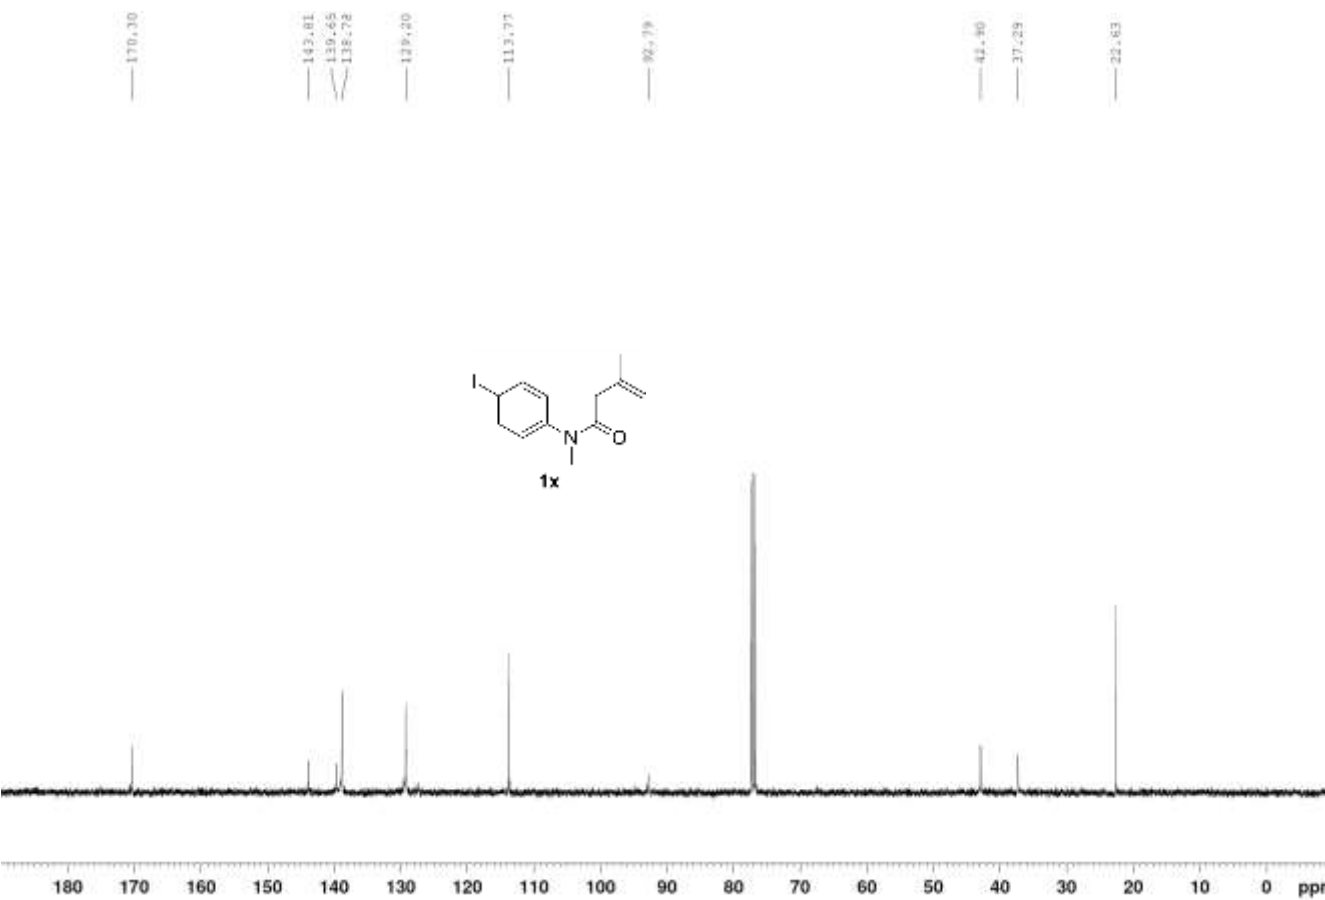

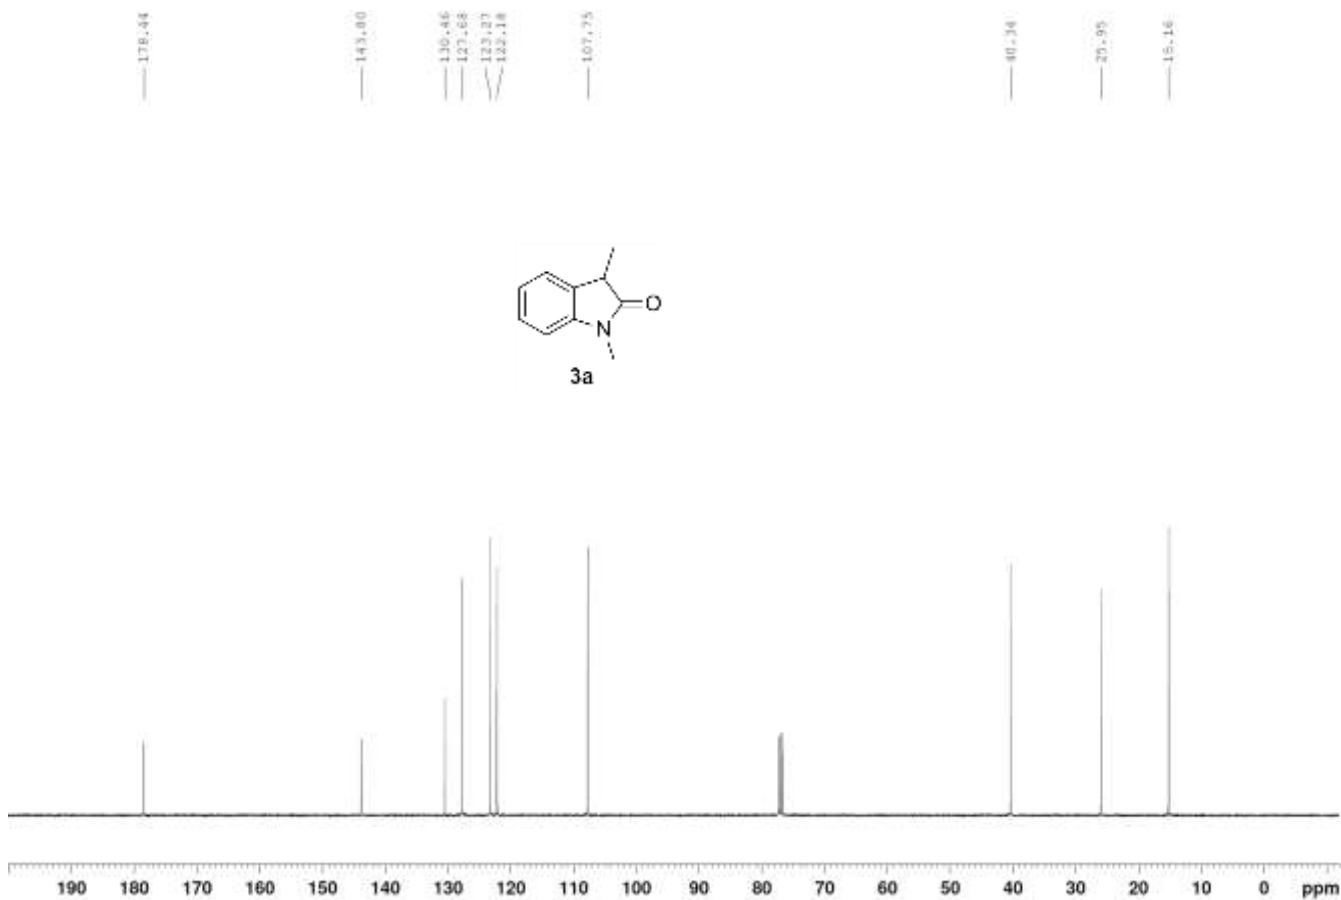

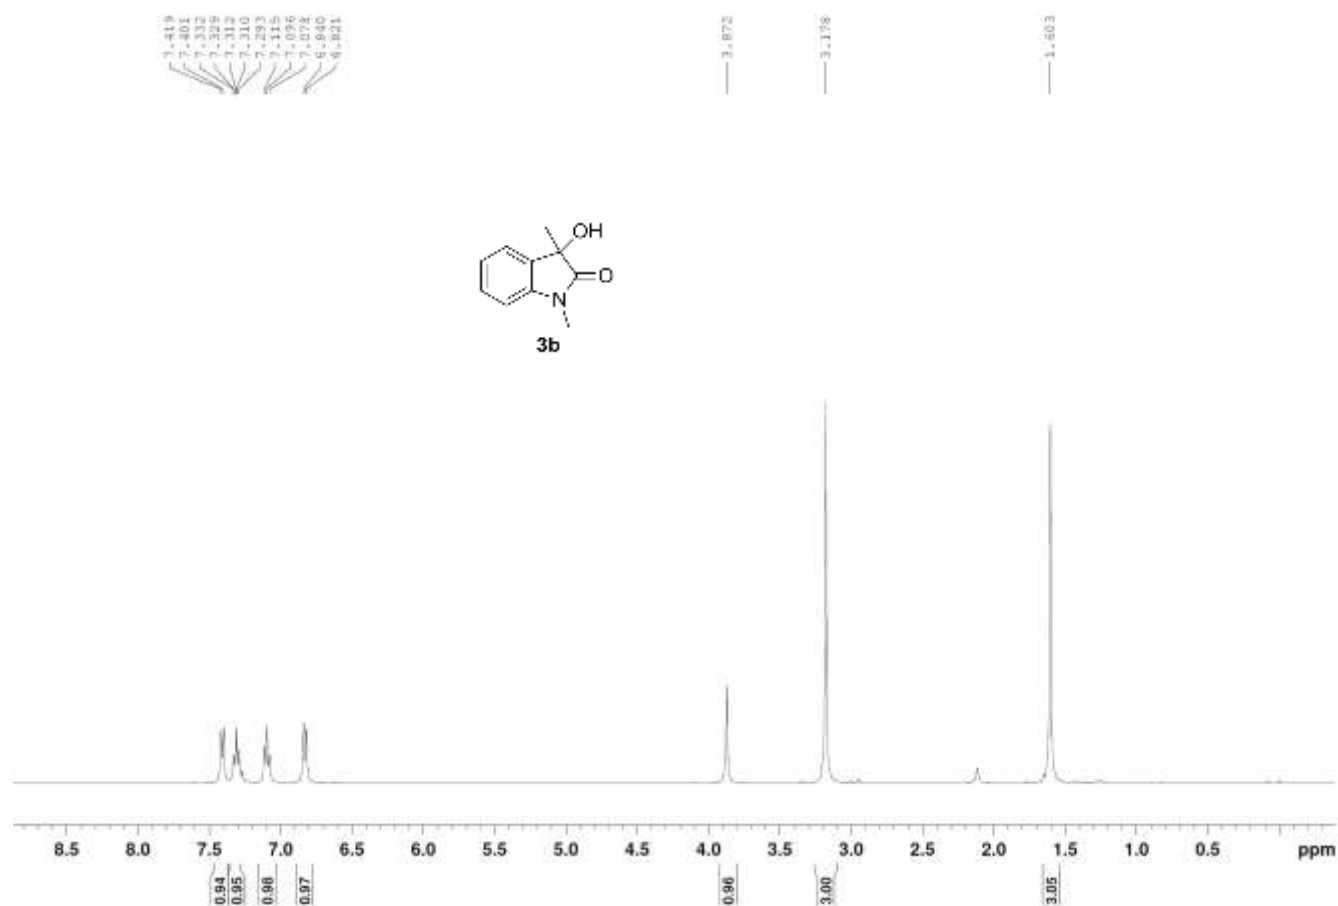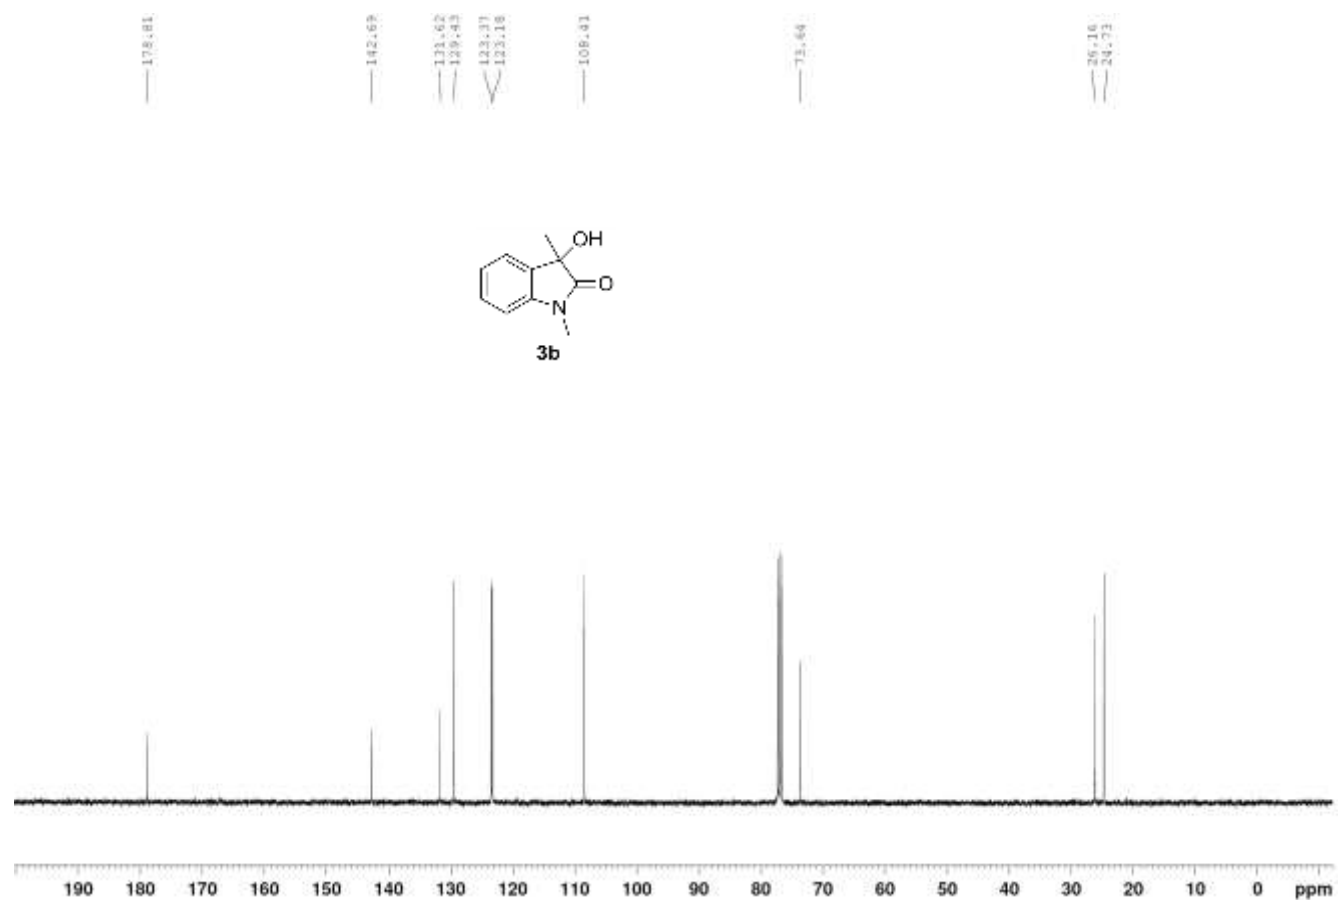

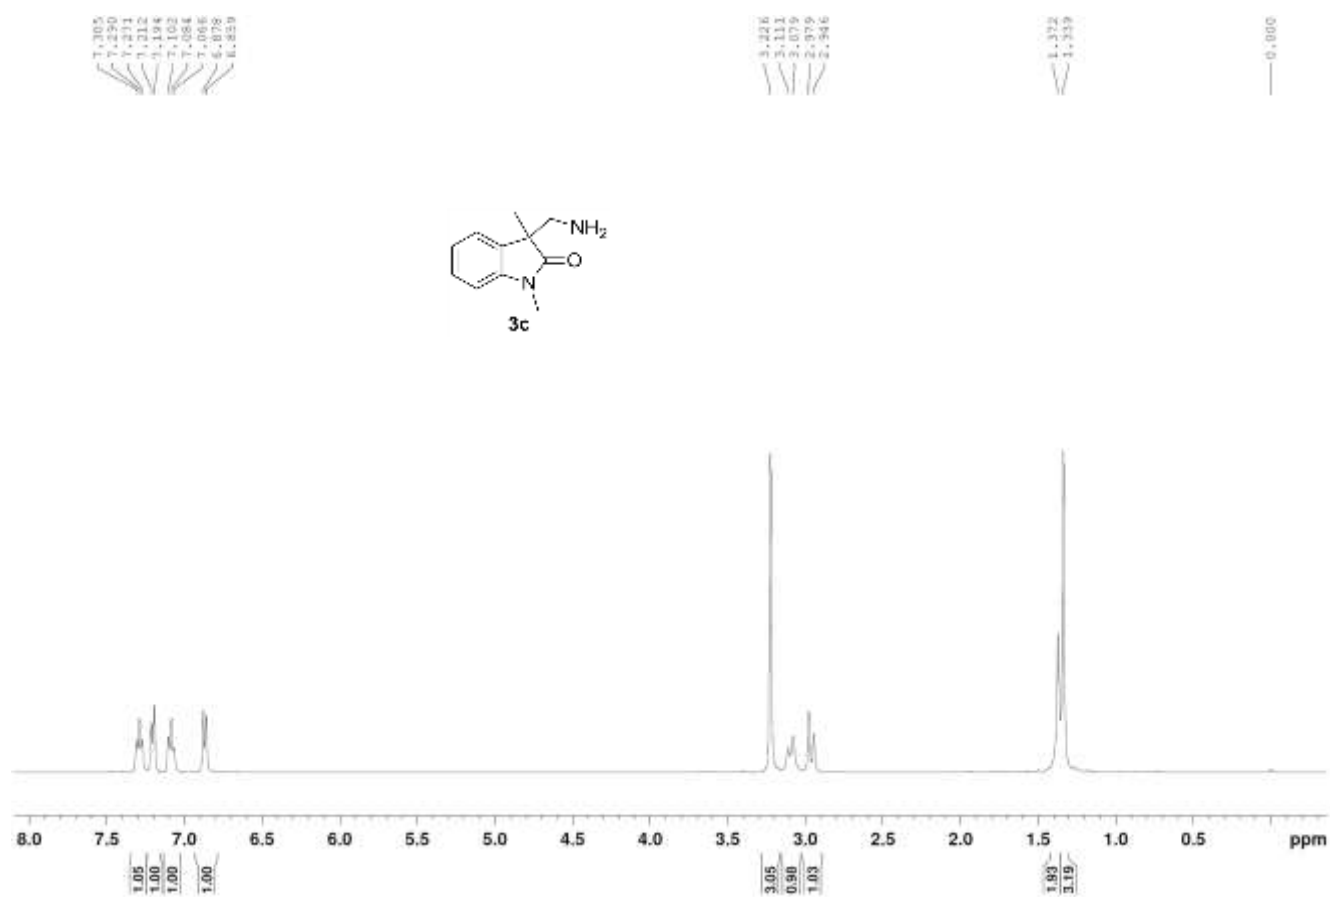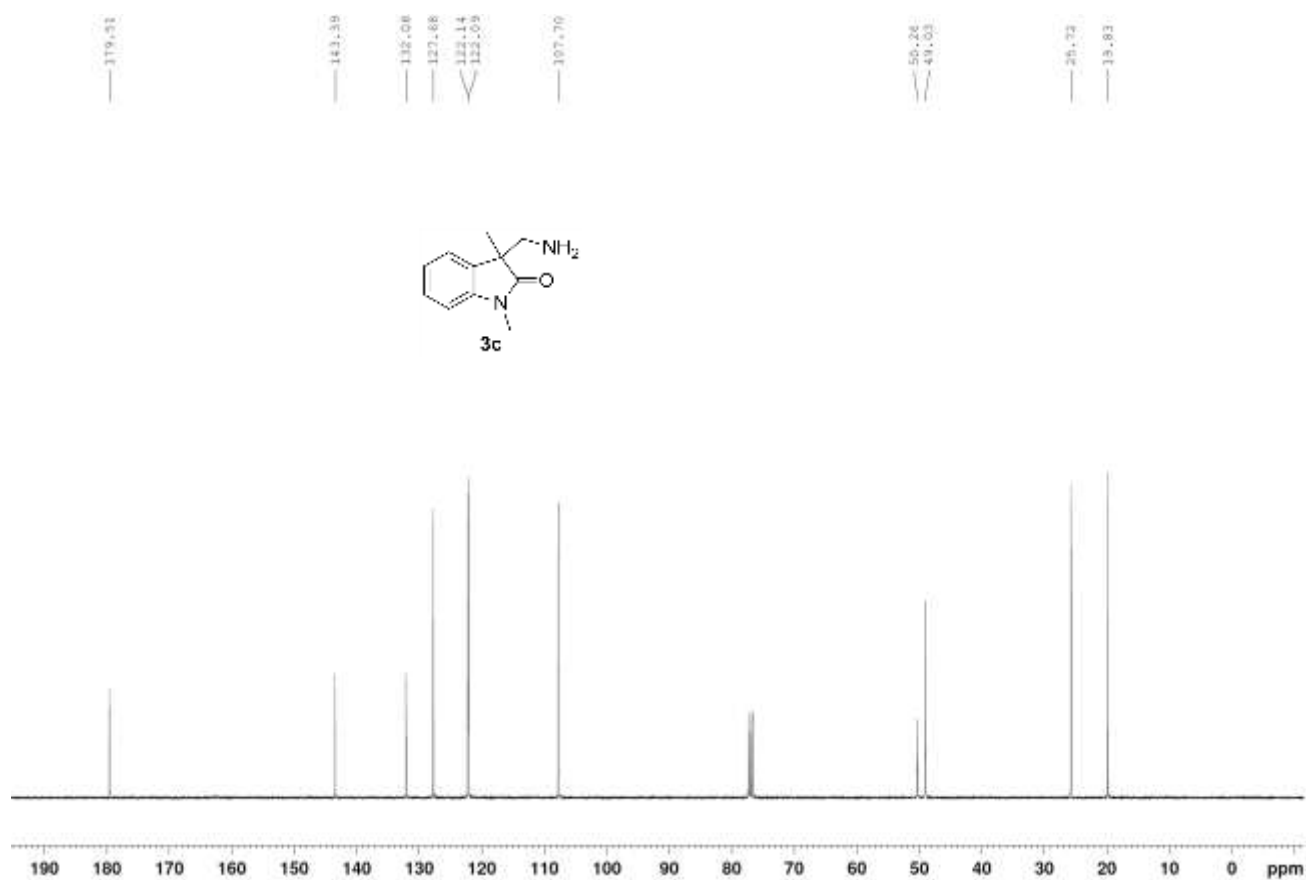

Supplement: c3cc47287f.pdf [file c3cc47287f.pdf]
